# Supplementary material for: Determination of the glycoprotein specificity of lectins on cell membranes through oxidative proteomics
Source: Chem Sci. 2020 Aug 17;11(35):9501–12. doi: 10.1039/d0sc04199h (PMC8162070; doi:10.1039/d0sc04199h)
Supplement: SC-011-D0SC04199H-s002 [file SC-011-D0SC04199H-s002.xlsx]

## Sheet: WGA
Protein Code	Protein Name	Oxidation Position
P08195	4F2	T221
P08195	4F2	F233
P21589	5NTD	V240
P21589	5NTD	M510
P15144	AMPN	F103
P15144	AMPN	Y161
P15144	AMPN	M486
P15144	AMPN	M693
P15144	AMPN	M444
Q9HDC9	APMAP	M278
Q12797	ASPH	I739
Q12797	ASPH	F496
Q12797	ASPH	V483
Q13740	CD166	M192
Q13740	CD166	Y384
P16070	CD44	F30
Q9H5V8	CDCP1	L137
Q9H5V8	CDCP1	T418
Q96KA5	CLP1L	F214
O96005	CLPT1	D263
Q8IWA5	CTL2	M260
Q8IWA5	CTL2	M688
Q14126	DSG2	F825
Q14126	DSG2	P142
P14625	ENPL	P571
P14625	ENPL	M658
P14625	ENPL	M335
P16422	EPCAM	M305
P16422	EPCAM	T134
Q96HE7	ERO1A	I171
P28799	GRN	V313
Q92896	GSLG1	F314
Q92896	GSLG1	M466
Q9Y4L1	HYOU1	M194
Q9NX62	IMPA3	M117
P17301	ITA2	Y949
P23229	ITA6	M1067
P06756	ITAV	F406
P06756	ITAV	M589
P05556	ITB1	C466
P05556	ITB1	M256
P05556	ITB1	M307
P05556	ITB1	L121
P16144	ITB4	W1147
P16144	ITB4	H1594
P16144	ITB4	M55
P32004	L1CAM	F687
Q13751	LAMB3	T1041
Q08380	LG3BP	F388
P11717	MPRI	V212
P11717	MPRI	P2103
P11717	MPRI	H94
Q5JPE7	NOMO2	P1086
Q5JPE7	NOMO2	M1232
O15118	NPC1	T405
O00469	PLOD2	P362
O15031	PLXB2	H1590
P05187	PPB1	M276
P50454	SERPH	M58
P50454	SERPH	P30
Q8TCJ2	STT3B	F589
Q8TCJ2	STT3B	M147
Q8TCJ2	STT3B	H100
Q8TCJ2	STT3B	M461
Q8TCJ2	STT3B	M322
Q9UH99	SUN2	M168
P09758	TACD2	Y104
P02786	TFR1	M432
Q9HD45	TM9S3	V87
Q9UHN6	TMEM2	T881
Q13641	TPBG	M302
P08582	TRFM	F253
Q96J42	TXD15	M338
P00533	EGFR	M1001
P00533	EGFR	M426
P00533	EGFR	M1
P10321	HLAC	M122
P05362	ICAM1	M1
P08069	IGF1R	M1247
P13612	ITA4	M756
P11279	LAMP1	M1
P07602	SAP	M76
Q99523	SORT	M518
Q9Y5Y6	ST14	M337
Q9Y5Y6	ST14	M173

## Sheet: SNA
Protein Code	Protein Name	Oxidation Position
P21589	5NTD	F193
P21589	5NTD	M105
P21589	5NTD	M113
O14672	ADA10	P631
Q12797	ASPH	H493
Q12797	ASPH	F719
P05026	AT1B1	Y242
O75976	CBPD	F516
Q6YHK3	CD109	Y1342
P48509	CD151	L98
Q13740	CD166	M192
Q08722	CD47	E201
Q9H5V8	CDCP1	I143
Q8IWA5	CTL2	P400
P27487	DPP4	D390
Q14126	DSG2	F825
P14625	ENPL	L259
P14625	ENPL	Y575
P14625	ENPL	M336
Q92896	GSLG1	F314
Q9Y4L1	HYOU1	F164
P17301	ITA2	T337
P06756	ITAV	M589
P06756	ITAV	M939
P05556	ITB1	F341
P16144	ITB4	H1594
P16144	ITB4	F398
P32004	L1CAM	F687
Q9UIQ6	LCAP	I148
P11717	MPRI	I1732
Q92542	NICA	F156
O15118	NPC1	T405
O00469	PLOD2	D316
O00469	PLOD2	M613
O00469	PLOD2	W622
O15031	PLXB2	H1590
Q8TEM1	PO210	M945
P05187	PPB1	M276
Q6ZRP7	QSOX2	H412
Q6ZRP7	QSOX2	H518
Q9UBV2	SE1L1	Y716
P50454	SERPH	T32
P50454	SERPH	M204
Q8TCJ2	STT3B	F589
Q8TCJ2	STT3B	M678
Q8TCJ2	STT3B	F760
Q8TCJ2	STT3B	L230
Q9UH99	SUN2	M168
Q16563	SYPL1	F82
Q9HD45	TM9S3	H278
Q9BVK6	TMED9	M49
Q13641	TPBG	H140
P15144	AMPN	M354
P15144	AMPN	M435
P15144	AMPN	M444
P15144	AMPN	M693
P15144	AMPN	V632
P00533	EGFR	M1007
P07602	SAP	M237
P11279	LAMP1	M1
Q5ZPR3	CD276	M147
Q9Y5Y6	ST14	M337
P10321	HLAC	M29
P08069	IGF1R	M1300
P18084	ITB5	M144
P18084	ITB5	M150
P18084	ITB5	M109
Q99729	ROAA	Y240

## Sheet: MAL
Protein Code	Protein Name	Oxidation Position
P15144	AMPN	M693
O75976	CBPD	F516
Q13740	CD166	L345
Q13740	CD166	F379
P16070	CD44	M724
P13987	CD59	K88
Q8IWA5	CTL2	V137
Q14126	DSG2	F825
Q14126	DSG2	V549
P14625	ENPL	M335
Q92896	GSLG1	F314
P17301	ITA2	T337
P17301	ITA2	Y949
P06756	ITAV	F385
P05556	ITB1	M306
P05556	ITB1	M307
P32004	L1CAM	F684
P32004	L1CAM	F681
P20645	MPRD	M119
P11717	MPRI	P173
P11717	MPRI	W49
P05187	PPB1	F370
P05187	PPB1	M275
P05187	PPB1	M276
P50454	SERPH	T32
P50454	SERPH	P30
P50454	SERPH	M204
P50454	SERPH	M203
Q8TCJ2	STT3B	F589
Q9BVK6	TMED9	Y140
Q13641	TPBG	M302

## Sheet: AAL
Supporting Data 1.xlsx	Protein Name	Oxidation Position
P08195	4F2	F569
P21589	5NTD	V240
P21589	5NTD	F120
P15144	AMPN	Y161
P15144	AMPN	M486
P15144	AMPN	M693
P15144	AMPN	M199
P15144	AMPN	M444
Q6YHK3	CD109	V1340
Q13740	CD166	L350
O96005	CLPT1	F375
P27487	DPP4	Y386
P27487	DPP4	T46
Q14126	DSG2	F825
P42892	ECE1	I500
P00533	EGFR	M426
P00533	EGFR	M793
Q96HE7	ERO1A	P220
Q8NBJ4	GOLM1	L92
Q9Y4L1	HYOU1	M358
P17301	ITA2	Y617
P26006	ITA3	T955
P23229	ITA6	W894
P23229	ITA6	Y1049
P06756	ITAV	F385
P06756	ITAV	F406
P05556	ITB1	C466
P05556	ITB1	C261
P05556	ITB1	C301
P05556	ITB1	F335
P16144	ITB4	F340
P32004	L1CAM	F687
P32004	L1CAM	T690
Q08380	LG3BP	F388
Q12907	LMAN2	F174
P20645	MPRD	W229
P11717	MPRI	C212
P11717	MPRI	C1427
P11717	MPRI	P1731
Q92542	NICA	F525
Q5JPE7	NOMO2	T390
Q5JPE7	NOMO2	C1234
O15118	NPC1	T405
Q9Y639	NPTN	Y42
Q02809	PLOD1	C680
O00469	PLOD2	Y603
O15031	PLXB2	F1635
Q8TEM1	PO210	C1611
P05187	PPB1	F384
P05187	PPB1	P308
P05187	PPB1	M296
P50454	SERPH	T32
P50454	SERPH	L270
P50454	SERPH	M204
Q8TCJ2	STT3B	L716
Q8TCJ2	STT3B	Y588
Q9UH99	SUN2	I431
P09758	TACD2	Y104
Q9BVK6	TMED9	L137
Q9BVK6	TMED9	L31
P13473	LAMP2	M1
P10321	HLAC	M122
Q99523	SORT	M581
P08069	IGF1R	M1300
Q92485	ASM3B	E243
P18084	ITB5	M144
P18084	ITB5	M150
Q99729	ROAA	Y235

## Sheet: PSA
Protein Code	Protein Name	Oxidation Position
Q9HDC9	APMAP	M278
Q9HDC9	APMAP	Y387
Q6YHK3	CD109	F483
Q13740	CD166	L350
Q14126	DSG2	F825
Q96HE7	ERO1A	F166
Q9Y4L1	HYOU1	M193
P17301	ITA2	F948
P23229	ITA6	W1076
P06756	ITAV	C172
P05556	ITB1	M307
P16144	ITB4	F911
P20645	MPRD	F154
P11717	MPRI	D202
P11717	MPRI	L138
P11717	MPRI	P1749
Q5JPE7	NOMO2	F171
Q02809	PLOD1	M573
O00469	PLOD2	T320
P05187	PPB1	Y389
P05187	PPB1	M288
P50454	SERPH	T327
P50454	SERPH	P30
P50454	SERPH	M204
Q8TCJ2	STT3B	M717
Q8TCJ2	STT3B	F589
Q8TCJ2	STT3B	M250
P02786	TFR1	Y402
P02786	TFR1	T248
P13473	LAMP2	M237
P10321	HLAC	M122
Q99523	SORT	I665
Q99523	SORT	M518

## Sheet: HHL
Protein Code	Protein Name	Oxidation Position
P21589	5NTD	M105
P21589	5NTD	Y345
Q14126	DSG2	F825
Q14126	DSG2	Y1015
P14625	ENPL	M335
Q92896	GSLG1	F314
P17301	ITA2	M515
P17301	ITA2	M517
P05556	ITB1	M307
P16144	ITB4	Y328
P16144	ITB4	F398
P32004	L1CAM	V683
P32004	L1CAM	H682
Q12907	LMAN2	M277
Q92542	NICA	Y523
Q5JPE7	NOMO2	F100
Q8TEM1	PO210	M957
Q8TEM1	PO210	M1017
Q8TEM1	PO210	Y1017
P05187	PPB1	H341
P05187	PPB1	M232
P05187	PPB1	M288
P05187	PPB1	M276
P50454	SERPH	M58
P46977	STT3A	P632
Q8TCJ2	STT3B	F589
Q8TCJ2	STT3B	Y588
P09758	TACD2	Y104
P15144	AMPN	F103
P30443	1A01	F133
P06756	ITAV	V403
P06756	ITAV	M939

## Sheet: PHA-E
Protein Code	Protein Name	Oxidation Position
P21589	5NTD	Y345
P15144	AMPN	M486
P15144	AMPN	M693
Q12797	ASPH	W560
Q12797	ASPH	H493
P53634	CATC	Y150
P27487	DPP4	Y43
Q14126	DSG2	F825
P16422	EPCAM	I133
Q96HE7	ERO1A	F284
Q92896	GSLG1	F314
Q92896	GSLG1	P633
Q92896	GSLG1	M403
Q92896	GSLG1	M466
P26006	ITA3	L96
P05556	ITB1	M307
P05556	ITB1	M193
P20645	MPRD	M119
P11717	MPRI	Y152
O15118	NPC1	M1001
P05187	PPB1	M155
P05187	PPB1	M232
P05187	PPB1	Y191
P05187	PPB1	M276
P53801	PTTG	Y165
P50454	SERPH	P30
P50454	SERPH	T32
P50454	SERPH	M271
P50454	SERPH	M58
P50454	SERPH	M235
Q8TCJ2	STT3B	Y588
Q8TCJ2	STT3B	F589
Q8TCJ2	STT3B	F760
Q9HD45	TM9S3	P427
Q9BVK6	TMED9	M59
Q9BVK6	TMED9	M136
Q13443	ADAM9	M372
P10321	HLAC	M122
P18084	ITB5	M144
P11279	LAMP1	M1
P13473	LAMP2	M48
P07602	SAP	M237
Q99523	SORT	M172
Q9Y5Y6	ST14	M337

## Sheet: PHA-L
Protein Code	Protein Name	Oxidation Position
P10314	1A32	F60
P15144	AMPN	M453
P05026	AT1B1	Y228
O75976	CBPD	F516
Q96KA5	CLP1L	Y208
Q96KA5	CLP1L	L208
O75718	CRTAP	M306
Q14126	DSG2	F825
Q92896	GSLG1	M478
Q92896	GSLG1	F314
P05556	ITB1	M334
P05556	ITB1	M193
P16144	ITB4	F398
Q08380	LG3BP	M96
P20645	MPRD	M137
P11717	MPRI	H151
O00469	PLOD2	M461
Q8TEM1	PO210	M945
P05187	PPB1	W190
P05187	PPB1	M243
P05187	PPB1	M276
P50454	SERPH	T32
P50454	SERPH	P30
P50454	SERPH	M235
Q8TCJ2	STT3B	Y588
Q8TCJ2	STT3B	F589
Q8TCJ2	STT3B	Y586
Q8TCJ2	STT3B	F101
Q8TCJ2	STT3B	F758
P02786	TFR1	F597
P02786	TFR1	M680
P02786	TFR1	Y614
P02751	FINC	M209
P11279	LAMP1	M1
