# Supplementary material for: Determination of the glycoprotein specificity of lectins on cell membranes through oxidative proteomics
Source: Chem Sci. 2020 Aug 17;11(35):9501–12. doi: 10.1039/d0sc04199h (PMC8162070; doi:10.1039/d0sc04199h)
Supplement: SC-011-D0SC04199H-s003 [file SC-011-D0SC04199H-s003.xlsx]

## Sheet: Sheet 1
Oxidizied Nonglycosylated Proteins (PNT2 Cells)
WGA	SNA	MAL	AAL	PSA	HHL	PHA-E	PHA-L
O94804	Q9UJZ1	Q01082	Q9UJZ1	P61586	Q01082	Q01082	Q15262
Q9UJZ1	P08865	P08865	Q01082	P63000	O95425	Q9P258	Q01082
Q01082	P61586	Q9P258	P61586	Q15019	P08865	Q15019	P08865
P08865	Q9P258	P63244	P63000	Q9NQC3	Q9P258	Q9NQC3	P61586
P61586	Q15019	Q9NQC3	Q15019	P35222	P63244	P01111	Q9P258
Q9P258	Q99808	Q9Y6M7	Q99808	Q9H4M9	P63000	Q9NZN4	Q8NFJ5
P63244	Q9NQC3	Q9NZN4	Q9NQC3	P15924	Q15019	P35222	P63244
P63000	Q9Y6M7	P35222	Q9Y6M7	Q07021	P15924	P15924	Q9Y6M7
P54920	Q9NZN4	P15924	P35222	P21926	Q03135	P58107	P62491
Q15019	P35222	Q9ULV4	Q9H4M9	Q9UDY2	Q6NZI2	O00499	P01111
Q9NQC3	Q9H4M9	P21926	P15924	Q9Y490	P21926	P12830	Q9H4M9
Q9Y6M7	P15924	P49755	P21926	Q8WXH0	Q9Y490	P21926	P15924
P61018	P58107	Q8WXH0	Q9UDY2	P23528	P21964	P46939	Q96AC1
Q9NZN4	P21926	Q01518	Q9P0L0	Q07065	O75923	P21796	Q07021
P35222	Q8NCG7	Q15758	P21796	Q15758	Q9BSJ8	Q9Y490	P21926
Q9H4M9	Q9UDY2	P12814	Q9Y490	P04083	P15311	P23634	Q9UDY2
P15924	Q9P0L0	P05023	P49755	O75923	Q9UKS6	P63010	Q9P0L0
P58107	Q9Y490	O75923	Q8WXH0	Q9BSJ8	P26038	P05023	O43493
Q07021	P49755	P15311	P25705	A0FGR8	Q13421	A0FGR8	Q9H0H5
Q6NZI2	Q96CP7	P26038	P23528	P15311	Q5JWF2	P15311	Q8NCT1
P21926	Q8WXH0	P33527	Q07065	Q5JWF2	P06213	P26038	O95471
Q8NCG7	Q96P48	Q16625	O94973	P33527	Q9Y2A7	Q14344	Q96CW1
Q9UDY2	P25705	Q9Y2A7	Q01518	Q9Y2A7	Q9NZM1	P06213	P63010
Q9P0L0	P23528	Q9UM54	Q15758	Q9NZM1	O00159	Q9Y2A7	Q9Y5S2
Q96GC9	P21964	Q9NZM1	P04083	Q15084	Q96HC4	Q9UM54	O75923
P21796	P13637	O00159	P30153	P07237	P46940	O00159	P15311
Q9Y490	O94973	Q13492	P05023	P11142	P30825	P07237	P26038
P49755	Q01518	P42356	O75923	P35221	P09429	P11142	Q9Y2A7
Q96CP7	Q15758	P11142	Q9BSJ8	O60716	P11166	P06733	Q9NZM1
Q8WXH0	Q96CW1	P04632	A0FGR8	P46940	Q14980	P46940	O00159
Q96P48	P63010	P06733	P15311	P09429	Q9UHB6	O60610	Q3SYG4
P23528	P30153	P35221	O75084	Q14980	Q8TCT9	P09429	P08238
P21964	P68104	P46940	Q5JWF2	Q9UHB6	Q9Y6L6	Q9H0U3	O75131
Q07065	Q9BSJ8	P09429	P33527	Q9UPN3	Q15046		P26232
P13637	A0FGR8	P07900	Q16625				P46940
O94973	P15311	Q14980	Q9Y2A7				P09429
Q15758	P26038	Q9UHB6	Q9UM54				P11166
Q96CW1	O75084	Q8TCT9	Q9NZM1				Q9UHB6
P04083	P63092	Q9UPN3	Q15084				Q92797
P63010	Q5JWF2		P07237
P05023	P33527		P42356
O75923	Q16625		P08238
P68104	Q9UM54		P11142
Q9BSJ8	Q9NZM1		P35221
A0FGR8	O00159		O60716
P15311	P07237		P46940
P26038	Q13492		O60610
O75084	P42356		P09429
P29992	Q96J02		P07900
P63092	P08238		P11166
Q5JWF2	P11142		Q14980
P33527	P35221		Q9UHB6
Q9Y2A7	O60716		Q92797
Q9UM54	P46940
Q9NZM1	P04264
O00159	O60610
Q15084	P09429
P07237	P07900
Q13492	Q9UPN3
Q96J02	Q15046
P08238
P11142
P06733
P35221
O60716
P46940
P04264
Q03001
Q6NSJ5
P09429
Q14980
Q9UHB6
Q8TCT9
Q9UPN3
Q15046
