# Supplementary material for: Determination of the glycoprotein specificity of lectins on cell membranes through oxidative proteomics
Source: Chem Sci. 2020 Aug 17;11(35):9501–12. doi: 10.1039/d0sc04199h (PMC8162070; doi:10.1039/d0sc04199h)
Supplement: SC-011-D0SC04199H-s004 [file SC-011-D0SC04199H-s004.xlsx]

## Sheet: Sheet1
PNT2 cell Glycoproteomics
UniProt ID	N-glycosites	Glycans	Glycan Code	Glycan Subtype
O00468	N250	Hex(9)HexNAc(2)	9_2_0_0	High mannose
O00468	N777	Hex(7)HexNAc(2)	7_2_0_0	High mannose
O00469	N63	Hex(8)HexNAc(7)Fuc(5)NeuAc(5)	8_7_5_5	Complex-Sialofucosylated
O00469	N63	Hex(9)HexNAc(9)NeuAc(2)	9_9_0_2	Complex-Sialylated
O00584	N212	Hex(6)HexNAc(2)	6_2_0_0	High mannose
O00584	N212	Hex(7)HexNAc(2)	7_2_0_0	High mannose
O00584	N212	Hex(8)HexNAc(2)	8_2_0_0	High mannose
O00584	N212	Hex(9)HexNAc(2)	9_2_0_0	High mannose
O00592	N360	Hex(5)HexNAc(4)Fuc(1)NeuAc(2)	5_4_1_2	Complex-Sialofucosylated
O00592	N360	Hex(5)HexNAc(4)Fuc(1)NeuAc(1)	5_4_1_1	Complex/Hybrid-Sialofucosylated
O00592	N360	Hex(6)HexNAc(5)Fuc(1)NeuAc(2)	6_5_1_2	Complex/Hybrid-Sialofucosylated
O14672	N278	Hex(8)HexNAc(2)	8_2_0_0	High mannose
O14672	N278	Hex(9)HexNAc(2)	9_2_0_0	High mannose
O14672	N439	Hex(6)HexNAc(2)	6_2_0_0	High mannose
O14672	N439	Hex(7)HexNAc(2)	7_2_0_0	High mannose
O14672	N439	Hex(8)HexNAc(2)	8_2_0_0	High mannose
O14672	N439	Hex(9)HexNAc(2)	9_2_0_0	High mannose
O14672	N551	Hex(5)HexNAc(4)Fuc(1)NeuAc(2)	5_4_1_2	Complex-Sialofucosylated
O14672	N551	Hex(5)HexNAc(4)Fuc(1)NeuAc(1)	5_4_1_1	Complex/Hybrid-Sialofucosylated
O14672	N551	Hex(5)HexNAc(4)Fuc(2)NeuAc(1)	5_4_2_1	Complex/Hybrid-Sialofucosylated
O14672	N551	Hex(5)HexNAc(4)Fuc(3)NeuAc(1)	5_4_3_1	Complex/Hybrid-Sialofucosylated
O14672	N551	Hex(8)HexNAc(2)	8_2_0_0	High mannose
O14672	N551	Hex(9)HexNAc(2)	9_2_0_0	High mannose
O14672	N551	Hex(6)HexNAc(3)NeuAc(1)	6_3_0_1	Hybrid-Sialylated
O15031	N1002	Hex(8)HexNAc(2)	8_2_0_0	High mannose
O15031	N1002	Hex(9)HexNAc(2)	9_2_0_0	High mannose
O15031	N1049	Hex(5)HexNAc(4)Fuc(2)NeuAc(1)	5_4_2_1	Complex/Hybrid-Sialofucosylated
O15031	N1068	Hex(5)HexNAc(5)Fuc(2)	5_5_2_0	Complex/Hybrid-Fucosylated
O15031	N1099	Hex(5)HexNAc(4)Fuc(1)NeuAc(1)	5_4_1_1	Complex/Hybrid-Sialofucosylated
O15031	N1099	Hex(5)HexNAc(4)Fuc(2)NeuAc(1)	5_4_2_1	Complex/Hybrid-Sialofucosylated
O15031	N1099	Hex(8)HexNAc(2)	8_2_0_0	High mannose
O15031	N1099	Hex(9)HexNAc(2)	9_2_0_0	High mannose
O15031	N1099	Hex(5)HexNAc(3)Fuc(1)NeuAc(1)	5_3_1_1	Hybrid-Sialofucosylated
O15031	N528	Hex(5)HexNAc(4)Fuc(1)NeuAc(2)	5_4_1_2	Complex-Sialofucosylated
O15031	N528	Hex(5)HexNAc(4)NeuAc(2)	5_4_0_2	Complex-Sialylated
O15031	N528	Hex(5)HexNAc(4)Fuc(2)NeuAc(1)	5_4_2_1	Complex/Hybrid-Sialofucosylated
O15031	N528	Hex(6)HexNAc(5)NeuAc(2)	6_5_0_2	Complex/Hybrid-Sialylated
O15031	N528	Hex(8)HexNAc(2)	8_2_0_0	High mannose
O15031	N528	Hex(9)HexNAc(2)	9_2_0_0	High mannose
O15031	N733	Hex(5)HexNAc(4)Fuc(1)NeuAc(2)	5_4_1_2	Complex-Sialofucosylated
O15031	N733	Hex(5)HexNAc(4)Fuc(2)	5_4_2_0	Complex/Hybrid-Fucosylated
O15031	N733	Hex(5)HexNAc(4)Fuc(2)NeuAc(1)	5_4_2_1	Complex/Hybrid-Sialofucosylated
O15031	N733	Hex(5)HexNAc(5)Fuc(1)NeuAc(1)	5_5_1_1	Complex/Hybrid-Sialofucosylated
O15031	N759	Hex(6)HexNAc(2)	6_2_0_0	High mannose
O15031	N759	Hex(7)HexNAc(2)	7_2_0_0	High mannose
O15031	N759	Hex(8)HexNAc(2)	8_2_0_0	High mannose
O15031	N759	Hex(9)HexNAc(2)	9_2_0_0	High mannose
O15031	N795	Hex(4)HexNAc(6)	4_6_0_0	Complex
O15031	N795	Hex(7)HexNAc(6)	7_6_0_0	Complex
O15031	N795	Hex(5)HexNAc(4)Fuc(1)NeuAc(2)	5_4_1_2	Complex-Sialofucosylated
O15031	N795	Hex(6)HexNAc(5)Fuc(1)NeuAc(3)	6_5_1_3	Complex-Sialofucosylated
O15031	N795	Hex(7)HexNAc(7)Fuc(1)NeuAc(1)	7_7_1_1	Complex-Sialofucosylated
O15031	N795	Hex(8)HexNAc(2)	8_2_0_0	High mannose
O15031	N795	Hex(9)HexNAc(2)	9_2_0_0	High mannose
O15118	N185	Hex(6)HexNAc(5)NeuAc(3)	6_5_0_3	Complex-Sialylated
O15118	N185	Hex(6)HexNAc(5)NeuAc(2)	6_5_0_2	Complex/Hybrid-Sialylated
O15230	N1330	Hex(9)HexNAc(2)	9_2_0_0	High mannose
O15230	N2209	Hex(9)HexNAc(2)	9_2_0_0	High mannose
O15230	N2568	Hex(5)HexNAc(4)Fuc(1)NeuAc(2)	5_4_1_2	Complex-Sialofucosylated
O15230	N2568	Hex(6)HexNAc(5)Fuc(1)NeuAc(3)	6_5_1_3	Complex-Sialofucosylated
O15230	N3287	Hex(3)HexNAc(6)	3_6_0_0	Complex
O15230	N3287	Hex(8)HexNAc(2)	8_2_0_0	High mannose
O15230	N95	Hex(5)HexNAc(5)Fuc(4)NeuAc(2)	5_5_4_2	Complex-Sialofucosylated
O15230	N95	Hex(9)HexNAc(2)	9_2_0_0	High mannose
O43157	N1253	Hex(5)HexNAc(4)Fuc(1)NeuAc(2)	5_4_1_2	Complex-Sialofucosylated
O43157	N1253	Hex(5)HexNAc(4)Fuc(2)NeuAc(1)	5_4_2_1	Complex/Hybrid-Sialofucosylated
O60635	N141	Hex(6)HexNAc(2)	6_2_0_0	High mannose
O60635	N141	Hex(7)HexNAc(2)	7_2_0_0	High mannose
O60635	N154	Hex(7)HexNAc(2)	7_2_0_0	High mannose
O60635	N154	Hex(8)HexNAc(2)	8_2_0_0	High mannose
O60635	N154	Hex(9)HexNAc(2)	9_2_0_0	High mannose
O60635	N154	Hex(5)HexNAc(3)Fuc(1)	5_3_1_0	Hybrid-Fucosylated
O60637	N167	Hex(5)HexNAc(4)Fuc(3)	5_4_3_0	Complex/Hybrid-Fucosylated
O60637	N167	Hex(6)HexNAc(5)Fuc(1)NeuAc(2)	6_5_1_2	Complex/Hybrid-Sialofucosylated
O60637	N167	Hex(5)HexNAc(3)Fuc(1)NeuAc(1)	5_3_1_1	Hybrid-Sialofucosylated
O75718	N363	Hex(7)HexNAc(2)	7_2_0_0	High mannose
O75718	N363	Hex(8)HexNAc(2)	8_2_0_0	High mannose
O75718	N87	Hex(8)HexNAc(8)Fuc(2)	8_8_2_0	Complex-Fucosylated
O75718	N87	Hex(6)HexNAc(6)Fuc(3)NeuAc(2)	6_6_3_2	Complex-Sialofucosylated
O75718	N87	Hex(7)HexNAc(6)Fuc(4)NeuAc(3)	7_6_4_3	Complex-Sialofucosylated
O75718	N87	Hex(6)HexNAc(6)NeuAc(2)	6_6_0_2	Complex-Sialylated
O75718	N87	Hex(7)HexNAc(2)	7_2_0_0	High mannose
O75718	N87	Hex(8)HexNAc(2)	8_2_0_0	High mannose
O75718	N87	Hex(9)HexNAc(2)	9_2_0_0	High mannose
O75882	N264	Hex(9)HexNAc(2)	9_2_0_0	High mannose
O75882	N731	Hex(9)HexNAc(2)	9_2_0_0	High mannose
O75976	N1070	Hex(5)HexNAc(4)Fuc(1)NeuAc(2)	5_4_1_2	Complex-Sialofucosylated
O75976	N1070	Hex(5)HexNAc(4)Fuc(3)	5_4_3_0	Complex/Hybrid-Fucosylated
O75976	N1070	Hex(5)HexNAc(4)Fuc(1)NeuAc(1)	5_4_1_1	Complex/Hybrid-Sialofucosylated
O75976	N1070	Hex(5)HexNAc(4)Fuc(2)NeuAc(1)	5_4_2_1	Complex/Hybrid-Sialofucosylated
O75976	N1070	Hex(5)HexNAc(4)Fuc(3)NeuAc(1)	5_4_3_1	Complex/Hybrid-Sialofucosylated
O75976	N1070	Hex(6)HexNAc(2)	6_2_0_0	High mannose
O75976	N1070	Hex(7)HexNAc(2)	7_2_0_0	High mannose
O75976	N172	Hex(5)HexNAc(4)Fuc(1)NeuAc(2)	5_4_1_2	Complex-Sialofucosylated
O75976	N172	Hex(6)HexNAc(5)Fuc(1)NeuAc(3)	6_5_1_3	Complex-Sialofucosylated
O75976	N172	Hex(6)HexNAc(5)Fuc(1)NeuAc(2)	6_5_1_2	Complex/Hybrid-Sialofucosylated
O75976	N172	Hex(6)HexNAc(5)Fuc(3)NeuAc(2)	6_5_3_2	Complex/Hybrid-Sialofucosylated
O75976	N522	Hex(5)HexNAc(4)Fuc(1)NeuAc(2)	5_4_1_2	Complex-Sialofucosylated
O75976	N855	Hex(5)HexNAc(4)Fuc(1)NeuAc(2)	5_4_1_2	Complex-Sialofucosylated
O75976	N855	Hex(5)HexNAc(4)Fuc(2)NeuAc(1)	5_4_2_1	Complex/Hybrid-Sialofucosylated
O75976	N978	Hex(5)HexNAc(4)Fuc(3)	5_4_3_0	Complex/Hybrid-Fucosylated
O75976	N978	Hex(5)HexNAc(4)Fuc(2)NeuAc(1)	5_4_2_1	Complex/Hybrid-Sialofucosylated
O95857	N137	Hex(5)HexNAc(4)Fuc(1)NeuAc(2)	5_4_1_2	Complex-Sialofucosylated
O95857	N137	Hex(5)HexNAc(4)Fuc(2)NeuAc(1)	5_4_2_1	Complex/Hybrid-Sialofucosylated
O96005	N295	Hex(6)HexNAc(2)	6_2_0_0	High mannose
O96005	N295	Hex(8)HexNAc(2)	8_2_0_0	High mannose
P00533	N196	Hex(5)HexNAc(4)Fuc(3)	5_4_3_0	Complex/Hybrid-Fucosylated
P00533	N196	Hex(6)HexNAc(2)	6_2_0_0	High mannose
P00533	N352	Hex(6)HexNAc(2)	6_2_0_0	High mannose
P00533	N352	Hex(7)HexNAc(2)	7_2_0_0	High mannose
P00533	N352	Hex(8)HexNAc(2)	8_2_0_0	High mannose
P00533	N361	Hex(7)HexNAc(2)	7_2_0_0	High mannose
P00533	N361	Hex(8)HexNAc(2)	8_2_0_0	High mannose
P00533	N528	Hex(5)HexNAc(4)Fuc(1)NeuAc(2)	5_4_1_2	Complex-Sialofucosylated
P00533	N528	Hex(5)HexNAc(4)Fuc(1)NeuAc(1)	5_4_1_1	Complex/Hybrid-Sialofucosylated
P00533	N528	Hex(6)HexNAc(5)Fuc(1)NeuAc(1)	6_5_1_1	Complex/Hybrid-Sialofucosylated
P00533	N528	Hex(6)HexNAc(5)Fuc(1)NeuAc(2)	6_5_1_2	Complex/Hybrid-Sialofucosylated
P00533	N568	Hex(7)HexNAc(6)Fuc(1)NeuAc(2)	7_6_1_2	Complex-Sialofucosylated
P00533	N568	Hex(7)HexNAc(6)Fuc(1)NeuAc(4)	7_6_1_4	Complex-Sialofucosylated
P00533	N568	Hex(6)HexNAc(5)Fuc(3)NeuAc(2)	6_5_3_2	Complex/Hybrid-Sialofucosylated
P00533	N623	Hex(6)HexNAc(2)	6_2_0_0	High mannose
P00533	N623	Hex(7)HexNAc(2)	7_2_0_0	High mannose
P00533	N623	Hex(8)HexNAc(2)	8_2_0_0	High mannose
P01889	N110	Hex(6)HexNAc(7)	6_7_0_0	Complex
P01889	N110	Hex(8)HexNAc(7)Fuc(1)	8_7_1_0	Complex-Fucosylated
P01889	N110	Hex(4)HexNAc(5)Fuc(1)NeuAc(2)	4_5_1_2	Complex-Sialofucosylated
P01889	N110	Hex(4)HexNAc(5)Fuc(2)NeuAc(1)	4_5_2_1	Complex-Sialofucosylated
P01889	N110	Hex(5)HexNAc(4)Fuc(1)NeuAc(2)	5_4_1_2	Complex-Sialofucosylated
P01889	N110	Hex(5)HexNAc(5)Fuc(1)NeuAc(2)	5_5_1_2	Complex-Sialofucosylated
P01889	N110	Hex(6)HexNAc(5)Fuc(1)NeuAc(3)	6_5_1_3	Complex-Sialofucosylated
P01889	N110	Hex(5)HexNAc(4)NeuAc(2)	5_4_0_2	Complex-Sialylated
P01889	N110	Hex(5)HexNAc(5)NeuAc(2)	5_5_0_2	Complex-Sialylated
P01889	N110	Hex(6)HexNAc(5)NeuAc(3)	6_5_0_3	Complex-Sialylated
P01889	N110	Hex(5)HexNAc(4)Fuc(2)NeuAc(1)	5_4_2_1	Complex/Hybrid-Sialofucosylated
P01889	N110	Hex(5)HexNAc(4)Fuc(3)NeuAc(1)	5_4_3_1	Complex/Hybrid-Sialofucosylated
P01889	N110	Hex(6)HexNAc(5)Fuc(1)NeuAc(2)	6_5_1_2	Complex/Hybrid-Sialofucosylated
P01889	N110	Hex(6)HexNAc(5)Fuc(2)NeuAc(2)	6_5_2_2	Complex/Hybrid-Sialofucosylated
P02751	N542	Hex(6)HexNAc(5)NeuAc(3)	6_5_0_3	Complex-Sialylated
P02751	N542	Hex(9)HexNAc(2)	9_2_0_0	High mannose
P02786	N251	Hex(5)HexNAc(4)Fuc(1)NeuAc(2)	5_4_1_2	Complex-Sialofucosylated
P02786	N251	Hex(6)HexNAc(5)Fuc(1)NeuAc(3)	6_5_1_3	Complex-Sialofucosylated
P02786	N251	Hex(7)HexNAc(6)Fuc(1)NeuAc(4)	7_6_1_4	Complex-Sialofucosylated
P02786	N251	Hex(7)HexNAc(6)Fuc(2)NeuAc(4)	7_6_2_4	Complex-Sialofucosylated
P02786	N251	Hex(5)HexNAc(4)Fuc(2)NeuAc(1)	5_4_2_1	Complex/Hybrid-Sialofucosylated
P02786	N251	Hex(5)HexNAc(4)Fuc(3)NeuAc(1)	5_4_3_1	Complex/Hybrid-Sialofucosylated
P02786	N251	Hex(6)HexNAc(5)Fuc(1)NeuAc(2)	6_5_1_2	Complex/Hybrid-Sialofucosylated
P02786	N251	Hex(6)HexNAc(4)Fuc(1)NeuAc(1)	6_4_1_1	Hybrid-Sialofucosylated
P02786	N727	Hex(8)HexNAc(2)	8_2_0_0	High mannose
P02786	N727	Hex(9)HexNAc(2)	9_2_0_0	High mannose
P04233	N130	Hex(6)HexNAc(2)	6_2_0_0	High mannose
P04233	N130	Hex(9)HexNAc(2)	9_2_0_0	High mannose
P04626	N530	Hex(5)HexNAc(4)Fuc(1)NeuAc(2)	5_4_1_2	Complex-Sialofucosylated
P04626	N530	Hex(6)HexNAc(5)NeuAc(2)	6_5_0_2	Complex/Hybrid-Sialylated
P05026	N158	Hex(7)HexNAc(6)Fuc(1)NeuAc(4)	7_6_1_4	Complex-Sialofucosylated
P05026	N158	Hex(8)HexNAc(7)Fuc(1)NeuAc(4)	8_7_1_4	Complex-Sialofucosylated
P05026	N158	Hex(8)HexNAc(7)Fuc(3)NeuAc(3)	8_7_3_3	Complex-Sialofucosylated
P05026	N158	Hex(9)HexNAc(8)Fuc(2)NeuAc(2)	9_8_2_2	Complex-Sialofucosylated
P05026	N193	Hex(7)HexNAc(6)Fuc(1)NeuAc(2)	7_6_1_2	Complex-Sialofucosylated
P05026	N193	Hex(7)HexNAc(6)Fuc(2)NeuAc(2)	7_6_2_2	Complex-Sialofucosylated
P05026	N265	Hex(6)HexNAc(7)Fuc(1)NeuAc(2)	6_7_1_2	Complex-Sialofucosylated
P05026	N265	Hex(7)HexNAc(7)Fuc(1)NeuAc(2)	7_7_1_2	Complex-Sialofucosylated
P05026	N265	Hex(7)HexNAc(7)NeuAc(2)	7_7_0_2	Complex-Sialylated
P05187	N144	Hex(4)HexNAc(5)Fuc(1)NeuAc(2)	4_5_1_2	Complex-Sialofucosylated
P05187	N144	Hex(5)HexNAc(4)Fuc(1)NeuAc(2)	5_4_1_2	Complex-Sialofucosylated
P05187	N144	Hex(5)HexNAc(5)Fuc(1)NeuAc(2)	5_5_1_2	Complex-Sialofucosylated
P05187	N144	Hex(5)HexNAc(4)Fuc(3)	5_4_3_0	Complex/Hybrid-Fucosylated
P05187	N144	Hex(5)HexNAc(5)Fuc(2)	5_5_2_0	Complex/Hybrid-Fucosylated
P05187	N144	Hex(5)HexNAc(4)Fuc(1)NeuAc(1)	5_4_1_1	Complex/Hybrid-Sialofucosylated
P05187	N144	Hex(5)HexNAc(4)Fuc(2)NeuAc(1)	5_4_2_1	Complex/Hybrid-Sialofucosylated
P05187	N144	Hex(5)HexNAc(4)Fuc(3)NeuAc(1)	5_4_3_1	Complex/Hybrid-Sialofucosylated
P05362	N267	Hex(7)HexNAc(6)Fuc(1)NeuAc(4)	7_6_1_4	Complex-Sialofucosylated
P05362	N406	Hex(5)HexNAc(4)Fuc(1)NeuAc(2)	5_4_1_2	Complex-Sialofucosylated
P05362	N406	Hex(5)HexNAc(4)Fuc(1)NeuAc(1)	5_4_1_1	Complex/Hybrid-Sialofucosylated
P05362	N406	Hex(5)HexNAc(4)Fuc(2)NeuAc(1)	5_4_2_1	Complex/Hybrid-Sialofucosylated
P05362	N406	Hex(5)HexNAc(4)Fuc(3)NeuAc(1)	5_4_3_1	Complex/Hybrid-Sialofucosylated
P05362	N406	Hex(6)HexNAc(5)Fuc(1)NeuAc(2)	6_5_1_2	Complex/Hybrid-Sialofucosylated
P05362	N406	Hex(6)HexNAc(3)NeuAc(1)	6_3_0_1	Hybrid-Sialylated
P05556	N212	Hex(3)HexNAc(7)Fuc(2)	3_7_2_0	Complex-Fucosylated
P05556	N212	Hex(6)HexNAc(6)Fuc(3)	6_6_3_0	Complex-Fucosylated
P05556	N212	Hex(4)HexNAc(4)Fuc(2)NeuAc(1)	4_4_2_1	Complex-Sialofucosylated
P05556	N212	Hex(5)HexNAc(4)Fuc(1)NeuAc(2)	5_4_1_2	Complex-Sialofucosylated
P05556	N212	Hex(6)HexNAc(5)Fuc(1)NeuAc(3)	6_5_1_3	Complex-Sialofucosylated
P05556	N212	Hex(6)HexNAc(6)Fuc(2)NeuAc(3)	6_6_2_3	Complex-Sialofucosylated
P05556	N212	Hex(7)HexNAc(6)Fuc(1)NeuAc(1)	7_6_1_1	Complex-Sialofucosylated
P05556	N212	Hex(7)HexNAc(6)Fuc(1)NeuAc(2)	7_6_1_2	Complex-Sialofucosylated
P05556	N212	Hex(7)HexNAc(6)Fuc(1)NeuAc(3)	7_6_1_3	Complex-Sialofucosylated
P05556	N212	Hex(6)HexNAc(6)NeuAc(3)	6_6_0_3	Complex-Sialylated
P05556	N212	Hex(5)HexNAc(4)Fuc(1)	5_4_1_0	Complex/Hybrid-Fucosylated
P05556	N212	Hex(5)HexNAc(4)Fuc(2)	5_4_2_0	Complex/Hybrid-Fucosylated
P05556	N212	Hex(5)HexNAc(4)Fuc(1)NeuAc(1)	5_4_1_1	Complex/Hybrid-Sialofucosylated
P05556	N212	Hex(5)HexNAc(4)Fuc(2)NeuAc(1)	5_4_2_1	Complex/Hybrid-Sialofucosylated
P05556	N212	Hex(6)HexNAc(5)Fuc(1)NeuAc(1)	6_5_1_1	Complex/Hybrid-Sialofucosylated
P05556	N212	Hex(6)HexNAc(5)Fuc(1)NeuAc(2)	6_5_1_2	Complex/Hybrid-Sialofucosylated
P05556	N212	Hex(6)HexNAc(5)Fuc(3)NeuAc(1)	6_5_3_1	Complex/Hybrid-Sialofucosylated
P05556	N212	Hex(5)HexNAc(3)Fuc(1)NeuAc(1)	5_3_1_1	Hybrid-Sialofucosylated
P05556	N212	Hex(6)HexNAc(3)NeuAc(1)	6_3_0_1	Hybrid-Sialylated
P05556	N406	Hex(5)HexNAc(4)Fuc(1)NeuAc(1)	5_4_1_1	Complex/Hybrid-Sialofucosylated
P05556	N481	Hex(6)HexNAc(5)Fuc(1)NeuAc(3)	6_5_1_3	Complex-Sialofucosylated
P05556	N481	Hex(7)HexNAc(6)Fuc(2)NeuAc(1)	7_6_2_1	Complex-Sialofucosylated
P05556	N481	Hex(7)HexNAc(6)Fuc(2)NeuAc(2)	7_6_2_2	Complex-Sialofucosylated
P05556	N481	Hex(5)HexNAc(4)NeuAc(2)	5_4_0_2	Complex-Sialylated
P05556	N481	Hex(6)HexNAc(5)NeuAc(3)	6_5_0_3	Complex-Sialylated
P05556	N481	Hex(7)HexNAc(6)NeuAc(2)	7_6_0_2	Complex-Sialylated
P05556	N481	Hex(7)HexNAc(6)NeuAc(3)	7_6_0_3	Complex-Sialylated
P05556	N481	Hex(7)HexNAc(6)NeuAc(4)	7_6_0_4	Complex-Sialylated
P05556	N481	Hex(6)HexNAc(5)Fuc(2)NeuAc(1)	6_5_2_1	Complex/Hybrid-Sialofucosylated
P05556	N481	Hex(6)HexNAc(5)NeuAc(2)	6_5_0_2	Complex/Hybrid-Sialylated
P05556	N50	Hex(4)HexNAc(6)	4_6_0_0	Complex
P05556	N50	Hex(3)HexNAc(4)Fuc(3)	3_4_3_0	Complex-Fucosylated
P05556	N50	Hex(7)HexNAc(6)Fuc(4)	7_6_4_0	Complex-Fucosylated
P05556	N50	Hex(6)HexNAc(5)Fuc(1)NeuAc(3)	6_5_1_3	Complex-Sialofucosylated
P05556	N50	Hex(6)HexNAc(5)Fuc(2)NeuAc(3)	6_5_2_3	Complex-Sialofucosylated
P05556	N50	Hex(6)HexNAc(5)Fuc(4)NeuAc(1)	6_5_4_1	Complex-Sialofucosylated
P05556	N50	Hex(7)HexNAc(6)Fuc(1)NeuAc(3)	7_6_1_3	Complex-Sialofucosylated
P05556	N50	Hex(7)HexNAc(6)Fuc(1)NeuAc(4)	7_6_1_4	Complex-Sialofucosylated
P05556	N50	Hex(7)HexNAc(6)Fuc(2)NeuAc(2)	7_6_2_2	Complex-Sialofucosylated
P05556	N50	Hex(7)HexNAc(6)Fuc(4)NeuAc(1)	7_6_4_1	Complex-Sialofucosylated
P05556	N50	Hex(7)HexNAc(6)Fuc(4)NeuAc(2)	7_6_4_2	Complex-Sialofucosylated
P05556	N50	Hex(7)HexNAc(6)Fuc(5)NeuAc(1)	7_6_5_1	Complex-Sialofucosylated
P05556	N50	Hex(8)HexNAc(7)Fuc(1)NeuAc(1)	8_7_1_1	Complex-Sialofucosylated
P05556	N50	Hex(8)HexNAc(7)Fuc(1)NeuAc(4)	8_7_1_4	Complex-Sialofucosylated
P05556	N50	Hex(5)HexNAc(6)NeuAc(2)	5_6_0_2	Complex-Sialylated
P05556	N50	Hex(6)HexNAc(5)NeuAc(3)	6_5_0_3	Complex-Sialylated
P05556	N50	Hex(7)HexNAc(6)NeuAc(3)	7_6_0_3	Complex-Sialylated
P05556	N50	Hex(7)HexNAc(6)NeuAc(4)	7_6_0_4	Complex-Sialylated
P05556	N50	Hex(8)HexNAc(7)NeuAc(1)	8_7_0_1	Complex-Sialylated
P05556	N50	Hex(5)HexNAc(4)Fuc(3)NeuAc(1)	5_4_3_1	Complex/Hybrid-Sialofucosylated
P05556	N50	Hex(6)HexNAc(5)Fuc(1)NeuAc(2)	6_5_1_2	Complex/Hybrid-Sialofucosylated
P05556	N50	Hex(6)HexNAc(5)Fuc(2)NeuAc(2)	6_5_2_2	Complex/Hybrid-Sialofucosylated
P05556	N50	Hex(6)HexNAc(5)Fuc(3)NeuAc(2)	6_5_3_2	Complex/Hybrid-Sialofucosylated
P05556	N50	Hex(7)HexNAc(5)Fuc(1)NeuAc(2)	7_5_1_2	Hybrid-Sialofucosylated
P05556	N50	Hex(7)HexNAc(5)Fuc(2)NeuAc(2)	7_5_2_2	Hybrid-Sialofucosylated
P05556	N520	Hex(7)HexNAc(6)Fuc(1)NeuAc(4)	7_6_1_4	Complex-Sialofucosylated
P05556	N520	Hex(7)HexNAc(6)Fuc(5)NeuAc(2)	7_6_5_2	Complex-Sialofucosylated
P05556	N520	Hex(4)HexNAc(3)Fuc(2)	4_3_2_0	Complex/Hybrid-Fucosylated
P05556	N520	Hex(6)HexNAc(3)Fuc(2)	6_3_2_0	Hybrid-Fucosylated
P05556	N520	Hex(6)HexNAc(3)NeuAc(1)	6_3_0_1	Hybrid-Sialylated
P05556	N584	Hex(4)HexNAc(4)Fuc(2)	4_4_2_0	Complex/Hybrid-Fucosylated
P05556	N669	Hex(5)HexNAc(4)Fuc(1)NeuAc(2)	5_4_1_2	Complex-Sialofucosylated
P05556	N669	Hex(6)HexNAc(5)Fuc(1)NeuAc(3)	6_5_1_3	Complex-Sialofucosylated
P05556	N669	Hex(6)HexNAc(5)Fuc(4)NeuAc(1)	6_5_4_1	Complex-Sialofucosylated
P05556	N669	Hex(7)HexNAc(6)Fuc(1)NeuAc(2)	7_6_1_2	Complex-Sialofucosylated
P05556	N669	Hex(7)HexNAc(6)Fuc(2)NeuAc(1)	7_6_2_1	Complex-Sialofucosylated
P05556	N669	Hex(7)HexNAc(6)Fuc(3)NeuAc(1)	7_6_3_1	Complex-Sialofucosylated
P05556	N669	Hex(7)HexNAc(6)Fuc(4)NeuAc(1)	7_6_4_1	Complex-Sialofucosylated
P05556	N669	Hex(5)HexNAc(4)NeuAc(2)	5_4_0_2	Complex-Sialylated
P05556	N669	Hex(6)HexNAc(5)NeuAc(3)	6_5_0_3	Complex-Sialylated
P05556	N669	Hex(7)HexNAc(6)NeuAc(2)	7_6_0_2	Complex-Sialylated
P05556	N669	Hex(5)HexNAc(4)Fuc(1)NeuAc(1)	5_4_1_1	Complex/Hybrid-Sialofucosylated
P05556	N669	Hex(5)HexNAc(4)Fuc(2)NeuAc(1)	5_4_2_1	Complex/Hybrid-Sialofucosylated
P05556	N669	Hex(5)HexNAc(4)Fuc(3)NeuAc(1)	5_4_3_1	Complex/Hybrid-Sialofucosylated
P05556	N669	Hex(6)HexNAc(5)Fuc(1)NeuAc(1)	6_5_1_1	Complex/Hybrid-Sialofucosylated
P05556	N669	Hex(6)HexNAc(5)Fuc(1)NeuAc(2)	6_5_1_2	Complex/Hybrid-Sialofucosylated
P05556	N669	Hex(6)HexNAc(5)Fuc(2)NeuAc(1)	6_5_2_1	Complex/Hybrid-Sialofucosylated
P05556	N669	Hex(6)HexNAc(5)Fuc(2)NeuAc(2)	6_5_2_2	Complex/Hybrid-Sialofucosylated
P05556	N669	Hex(6)HexNAc(5)Fuc(3)NeuAc(1)	6_5_3_1	Complex/Hybrid-Sialofucosylated
P06756	N615	Hex(3)HexNAc(7)	3_7_0_0	Complex
P06756	N615	Hex(10)HexNAc(2)	10_2_0_0	High mannose
P06756	N615	Hex(8)HexNAc(2)	8_2_0_0	High mannose
P06756	N615	Hex(9)HexNAc(2)	9_2_0_0	High mannose
P06756	N74	Hex(5)HexNAc(4)Fuc(1)NeuAc(2)	5_4_1_2	Complex-Sialofucosylated
P06756	N74	Hex(5)HexNAc(4)Fuc(1)	5_4_1_0	Complex/Hybrid-Fucosylated
P06756	N74	Hex(5)HexNAc(4)Fuc(2)	5_4_2_0	Complex/Hybrid-Fucosylated
P06756	N74	Hex(6)HexNAc(5)Fuc(3)	6_5_3_0	Complex/Hybrid-Fucosylated
P06756	N74	Hex(5)HexNAc(4)Fuc(1)NeuAc(1)	5_4_1_1	Complex/Hybrid-Sialofucosylated
P06756	N74	Hex(5)HexNAc(4)Fuc(2)NeuAc(1)	5_4_2_1	Complex/Hybrid-Sialofucosylated
P06756	N74	Hex(6)HexNAc(2)	6_2_0_0	High mannose
P06756	N74	Hex(7)HexNAc(2)	7_2_0_0	High mannose
P06756	N74	Hex(8)HexNAc(2)	8_2_0_0	High mannose
P06756	N74	Hex(5)HexNAc(3)Fuc(2)	5_3_2_0	Hybrid-Fucosylated
P06756	N74	Hex(5)HexNAc(3)Fuc(1)NeuAc(1)	5_3_1_1	Hybrid-Sialofucosylated
P06756	N74	Hex(6)HexNAc(3)NeuAc(1)	6_3_0_1	Hybrid-Sialylated
P06756	N874	Hex(8)HexNAc(2)	8_2_0_0	High mannose
P06756	N874	Hex(9)HexNAc(2)	9_2_0_0	High mannose
P06756	N945	Hex(7)HexNAc(2)	7_2_0_0	High mannose
P07602	N101	Hex(3)HexNAc(3)	3_3_0_0	Complex
P07602	N215	Hex(6)HexNAc(5)Fuc(1)NeuAc(3)	6_5_1_3	Complex-Sialofucosylated
P07602	N80	Hex(3)HexNAc(3)	3_3_0_0	Complex
P08069	N244	Hex(4)HexNAc(6)	4_6_0_0	Complex
P08069	N244	Hex(8)HexNAc(7)Fuc(1)	8_7_1_0	Complex-Fucosylated
P08069	N244	Hex(5)HexNAc(4)Fuc(3)NeuAc(1)	5_4_3_1	Complex/Hybrid-Sialofucosylated
P08069	N244	Hex(9)HexNAc(2)	9_2_0_0	High mannose
P08069	N314	Hex(9)HexNAc(2)	9_2_0_0	High mannose
P08174	N95	Hex(5)HexNAc(4)NeuAc(2)	5_4_0_2	Complex-Sialylated
P08174	N95	Hex(6)HexNAc(5)NeuAc(3)	6_5_0_3	Complex-Sialylated
P08195	N365	Hex(5)HexNAc(4)Fuc(1)NeuAc(2)	5_4_1_2	Complex-Sialofucosylated
P08195	N365	Hex(6)HexNAc(5)Fuc(1)NeuAc(3)	6_5_1_3	Complex-Sialofucosylated
P08195	N365	Hex(6)HexNAc(5)NeuAc(3)	6_5_0_3	Complex-Sialylated
P08195	N365	Hex(6)HexNAc(5)Fuc(1)NeuAc(2)	6_5_1_2	Complex/Hybrid-Sialofucosylated
P08195	N365	Hex(6)HexNAc(5)Fuc(2)NeuAc(1)	6_5_2_1	Complex/Hybrid-Sialofucosylated
P08195	N381	Hex(7)HexNAc(6)NeuAc(4)	7_6_0_4	Complex-Sialylated
P08582	N135	Hex(7)HexNAc(2)	7_2_0_0	High mannose
P08582	N135	Hex(8)HexNAc(2)	8_2_0_0	High mannose
P08582	N135	Hex(9)HexNAc(2)	9_2_0_0	High mannose
P08582	N38	Hex(6)HexNAc(5)Fuc(1)NeuAc(3)	6_5_1_3	Complex-Sialofucosylated
P08582	N515	Hex(5)HexNAc(4)Fuc(1)NeuAc(2)	5_4_1_2	Complex-Sialofucosylated
P08582	N515	Hex(5)HexNAc(5)Fuc(1)NeuAc(2)	5_5_1_2	Complex-Sialofucosylated
P08582	N515	Hex(6)HexNAc(5)Fuc(1)NeuAc(3)	6_5_1_3	Complex-Sialofucosylated
P08582	N515	Hex(6)HexNAc(5)Fuc(2)NeuAc(3)	6_5_2_3	Complex-Sialofucosylated
P08582	N515	Hex(6)HexNAc(5)Fuc(4)NeuAc(1)	6_5_4_1	Complex-Sialofucosylated
P08582	N515	Hex(5)HexNAc(4)NeuAc(3)	5_4_0_3	Complex-Sialylated
P08582	N515	Hex(6)HexNAc(5)NeuAc(3)	6_5_0_3	Complex-Sialylated
P08582	N515	Hex(8)HexNAc(7)NeuAc(1)	8_7_0_1	Complex-Sialylated
P08582	N515	Hex(5)HexNAc(4)Fuc(1)NeuAc(1)	5_4_1_1	Complex/Hybrid-Sialofucosylated
P08582	N515	Hex(5)HexNAc(4)Fuc(2)NeuAc(1)	5_4_2_1	Complex/Hybrid-Sialofucosylated
P08582	N515	Hex(5)HexNAc(4)Fuc(3)NeuAc(1)	5_4_3_1	Complex/Hybrid-Sialofucosylated
P08582	N515	Hex(6)HexNAc(5)Fuc(1)NeuAc(1)	6_5_1_1	Complex/Hybrid-Sialofucosylated
P08582	N515	Hex(6)HexNAc(5)Fuc(1)NeuAc(2)	6_5_1_2	Complex/Hybrid-Sialofucosylated
P08582	N515	Hex(6)HexNAc(5)Fuc(2)NeuAc(1)	6_5_2_1	Complex/Hybrid-Sialofucosylated
P08582	N515	Hex(6)HexNAc(5)Fuc(2)NeuAc(2)	6_5_2_2	Complex/Hybrid-Sialofucosylated
P08582	N515	Hex(6)HexNAc(5)Fuc(3)NeuAc(1)	6_5_3_1	Complex/Hybrid-Sialofucosylated
P08582	N515	Hex(6)HexNAc(5)Fuc(3)NeuAc(2)	6_5_3_2	Complex/Hybrid-Sialofucosylated
P08582	N515	Hex(6)HexNAc(5)NeuAc(2)	6_5_0_2	Complex/Hybrid-Sialylated
P08582	N515	Hex(6)HexNAc(4)Fuc(3)	6_4_3_0	Hybrid-Fucosylated
P08582	N515	Hex(6)HexNAc(4)Fuc(1)NeuAc(2)	6_4_1_2	Hybrid-Sialofucosylated
P08582	N515	Hex(6)HexNAc(4)Fuc(2)NeuAc(1)	6_4_2_1	Hybrid-Sialofucosylated
P08582	N515	Hex(7)HexNAc(5)Fuc(1)NeuAc(2)	7_5_1_2	Hybrid-Sialofucosylated
P08582	N515	Hex(6)HexNAc(4)NeuAc(2)	6_4_0_2	Hybrid-Sialylated
P08648	N868	Hex(5)HexNAc(4)Fuc(1)NeuAc(2)	5_4_1_2	Complex-Sialofucosylated
P08648	N868	Hex(5)HexNAc(4)NeuAc(2)	5_4_0_2	Complex-Sialylated
P08648	N868	Hex(5)HexNAc(4)Fuc(2)NeuAc(1)	5_4_2_1	Complex/Hybrid-Sialofucosylated
P08648	N868	Hex(5)HexNAc(4)Fuc(3)NeuAc(1)	5_4_3_1	Complex/Hybrid-Sialofucosylated
P08648	N868	Hex(9)HexNAc(2)	9_2_0_0	High mannose
P09758	N120	Hex(3)HexNAc(6)	3_6_0_0	Complex
P09758	N120	Hex(5)HexNAc(6)	5_6_0_0	Complex
P09758	N120	Hex(3)HexNAc(4)Fuc(3)	3_4_3_0	Complex-Fucosylated
P09758	N120	Hex(5)HexNAc(5)Fuc(3)NeuAc(2)	5_5_3_2	Complex-Sialofucosylated
P09758	N120	Hex(5)HexNAc(7)Fuc(4)NeuAc(1)	5_7_4_1	Complex-Sialofucosylated
P09758	N120	Hex(6)HexNAc(7)Fuc(1)NeuAc(3)	6_7_1_3	Complex-Sialofucosylated
P09758	N120	Hex(5)HexNAc(7)NeuAc(1)	5_7_0_1	Complex-Sialylated
P09758	N168	Hex(5)HexNAc(4)Fuc(1)NeuAc(2)	5_4_1_2	Complex-Sialofucosylated
P09758	N168	Hex(5)HexNAc(5)Fuc(2)NeuAc(2)	5_5_2_2	Complex-Sialofucosylated
P09758	N168	Hex(6)HexNAc(5)Fuc(1)NeuAc(3)	6_5_1_3	Complex-Sialofucosylated
P09758	N168	Hex(6)HexNAc(5)Fuc(4)NeuAc(1)	6_5_4_1	Complex-Sialofucosylated
P09758	N168	Hex(7)HexNAc(6)Fuc(1)NeuAc(3)	7_6_1_3	Complex-Sialofucosylated
P09758	N168	Hex(5)HexNAc(4)NeuAc(2)	5_4_0_2	Complex-Sialylated
P09758	N168	Hex(6)HexNAc(5)NeuAc(3)	6_5_0_3	Complex-Sialylated
P09758	N168	Hex(5)HexNAc(4)Fuc(2)NeuAc(1)	5_4_2_1	Complex/Hybrid-Sialofucosylated
P09758	N208	Hex(5)HexNAc(4)Fuc(1)NeuAc(2)	5_4_1_2	Complex-Sialofucosylated
P09758	N208	Hex(5)HexNAc(4)Fuc(1)NeuAc(1)	5_4_1_1	Complex/Hybrid-Sialofucosylated
P09758	N208	Hex(5)HexNAc(4)Fuc(2)NeuAc(1)	5_4_2_1	Complex/Hybrid-Sialofucosylated
P10314	N110	Hex(4)HexNAc(5)Fuc(1)NeuAc(1)	4_5_1_1	Complex-Sialofucosylated
P10314	N110	Hex(4)HexNAc(5)Fuc(2)NeuAc(1)	4_5_2_1	Complex-Sialofucosylated
P10314	N110	Hex(5)HexNAc(4)Fuc(1)NeuAc(2)	5_4_1_2	Complex-Sialofucosylated
P10314	N110	Hex(3)HexNAc(6)NeuAc(2)	3_6_0_2	Complex-Sialylated
P10321	N110	Hex(4)HexNAc(5)Fuc(1)NeuAc(2)	4_5_1_2	Complex-Sialofucosylated
P10321	N110	Hex(4)HexNAc(5)Fuc(2)NeuAc(1)	4_5_2_1	Complex-Sialofucosylated
P10321	N110	Hex(5)HexNAc(4)Fuc(1)NeuAc(2)	5_4_1_2	Complex-Sialofucosylated
P10321	N110	Hex(5)HexNAc(4)Fuc(2)NeuAc(2)	5_4_2_2	Complex-Sialofucosylated
P10321	N110	Hex(6)HexNAc(5)Fuc(1)NeuAc(3)	6_5_1_3	Complex-Sialofucosylated
P10321	N110	Hex(6)HexNAc(5)Fuc(4)NeuAc(1)	6_5_4_1	Complex-Sialofucosylated
P10321	N110	Hex(9)HexNAc(8)Fuc(6)NeuAc(2)	9_8_6_2	Complex-Sialofucosylated
P10321	N110	Hex(5)HexNAc(4)NeuAc(2)	5_4_0_2	Complex-Sialylated
P10321	N110	Hex(6)HexNAc(5)Fuc(2)NeuAc(2)	6_5_2_2	Complex/Hybrid-Sialofucosylated
P10321	N110	Hex(10)HexNAc(2)	10_2_0_0	High mannose
P10321	N110	Hex(8)HexNAc(2)	8_2_0_0	High mannose
P10321	N110	Hex(9)HexNAc(2)	9_2_0_0	High mannose
P10909	N291	Hex(7)HexNAc(2)	7_2_0_0	High mannose
P10909	N291	Hex(8)HexNAc(2)	8_2_0_0	High mannose
P11047	N1107	Hex(8)HexNAc(2)	8_2_0_0	High mannose
P11047	N1205	Hex(8)HexNAc(2)	8_2_0_0	High mannose
P11047	N1223	Hex(8)HexNAc(2)	8_2_0_0	High mannose
P11047	N1241	Hex(8)HexNAc(2)	8_2_0_0	High mannose
P11047	N1380	Hex(5)HexNAc(4)Fuc(1)NeuAc(2)	5_4_1_2	Complex-Sialofucosylated
P11047	N1395	Hex(8)HexNAc(2)	8_2_0_0	High mannose
P11047	N650	Hex(8)HexNAc(2)	8_2_0_0	High mannose
P11047	N650	Hex(9)HexNAc(2)	9_2_0_0	High mannose
P11117	N133	Hex(5)HexNAc(4)Fuc(1)NeuAc(2)	5_4_1_2	Complex-Sialofucosylated
P11117	N133	Hex(6)HexNAc(5)Fuc(1)NeuAc(3)	6_5_1_3	Complex-Sialofucosylated
P11117	N133	Hex(7)HexNAc(6)Fuc(1)NeuAc(3)	7_6_1_3	Complex-Sialofucosylated
P11117	N133	Hex(7)HexNAc(6)Fuc(1)NeuAc(4)	7_6_1_4	Complex-Sialofucosylated
P11279	N103	Hex(5)HexNAc(2)	5_2_0_0	High mannose
P11279	N103	Hex(6)HexNAc(2)	6_2_0_0	High mannose
P11279	N103	Hex(7)HexNAc(2)	7_2_0_0	High mannose
P11279	N103	Hex(8)HexNAc(2)	8_2_0_0	High mannose
P11279	N103	Hex(9)HexNAc(2)	9_2_0_0	High mannose
P11279	N103	Hex(6)HexNAc(3)NeuAc(1)	6_3_0_1	Hybrid-Sialylated
P11279	N249	Hex(4)HexNAc(3)Fuc(1)NeuAc(1)	4_3_1_1	Complex-Sialofucosylated
P11279	N249	Hex(5)HexNAc(4)Fuc(1)NeuAc(2)	5_4_1_2	Complex-Sialofucosylated
P11279	N249	Hex(6)HexNAc(5)Fuc(1)NeuAc(3)	6_5_1_3	Complex-Sialofucosylated
P11279	N249	Hex(4)HexNAc(3)Fuc(1)	4_3_1_0	Complex/Hybrid-Fucosylated
P11279	N249	Hex(5)HexNAc(4)Fuc(2)	5_4_2_0	Complex/Hybrid-Fucosylated
P11279	N249	Hex(5)HexNAc(4)Fuc(1)NeuAc(1)	5_4_1_1	Complex/Hybrid-Sialofucosylated
P11279	N249	Hex(6)HexNAc(5)Fuc(1)NeuAc(1)	6_5_1_1	Complex/Hybrid-Sialofucosylated
P11279	N249	Hex(6)HexNAc(5)Fuc(1)NeuAc(2)	6_5_1_2	Complex/Hybrid-Sialofucosylated
P11279	N249	Hex(6)HexNAc(5)Fuc(2)NeuAc(1)	6_5_2_1	Complex/Hybrid-Sialofucosylated
P11279	N261	Hex(7)HexNAc(6)Fuc(1)	7_6_1_0	Complex-Fucosylated
P11279	N261	Hex(7)HexNAc(6)Fuc(1)NeuAc(1)	7_6_1_1	Complex-Sialofucosylated
P11279	N261	Hex(6)HexNAc(5)Fuc(1)NeuAc(1)	6_5_1_1	Complex/Hybrid-Sialofucosylated
P11279	N261	Hex(6)HexNAc(5)Fuc(1)NeuAc(2)	6_5_1_2	Complex/Hybrid-Sialofucosylated
P11279	N261	Hex(5)HexNAc(2)	5_2_0_0	High mannose
P11279	N261	Hex(6)HexNAc(2)	6_2_0_0	High mannose
P11279	N261	Hex(7)HexNAc(2)	7_2_0_0	High mannose
P11279	N261	Hex(8)HexNAc(2)	8_2_0_0	High mannose
P11279	N261	Hex(6)HexNAc(3)	6_3_0_0	Hybrid
P11279	N261	Hex(6)HexNAc(3)NeuAc(1)	6_3_0_1	Hybrid-Sialylated
P11279	N322	Hex(8)HexNAc(2)	8_2_0_0	High mannose
P11279	N76	Hex(6)HexNAc(6)Fuc(1)NeuAc(2)	6_6_1_2	Complex-Sialofucosylated
P11279	N84	Hex(8)HexNAc(7)	8_7_0_0	Complex
P11279	N84	Hex(4)HexNAc(3)Fuc(1)NeuAc(1)	4_3_1_1	Complex-Sialofucosylated
P11279	N84	Hex(5)HexNAc(4)Fuc(1)NeuAc(2)	5_4_1_2	Complex-Sialofucosylated
P11279	N84	Hex(6)HexNAc(5)Fuc(1)NeuAc(3)	6_5_1_3	Complex-Sialofucosylated
P11279	N84	Hex(6)HexNAc(5)Fuc(4)NeuAc(3)	6_5_4_3	Complex-Sialofucosylated
P11279	N84	Hex(6)HexNAc(6)Fuc(1)NeuAc(3)	6_6_1_3	Complex-Sialofucosylated
P11279	N84	Hex(6)HexNAc(6)Fuc(2)NeuAc(3)	6_6_2_3	Complex-Sialofucosylated
P11279	N84	Hex(7)HexNAc(6)Fuc(1)NeuAc(2)	7_6_1_2	Complex-Sialofucosylated
P11279	N84	Hex(7)HexNAc(6)Fuc(1)NeuAc(3)	7_6_1_3	Complex-Sialofucosylated
P11279	N84	Hex(7)HexNAc(6)Fuc(1)NeuAc(4)	7_6_1_4	Complex-Sialofucosylated
P11279	N84	Hex(7)HexNAc(6)Fuc(3)NeuAc(1)	7_6_3_1	Complex-Sialofucosylated
P11279	N84	Hex(8)HexNAc(7)Fuc(1)NeuAc(4)	8_7_1_4	Complex-Sialofucosylated
P11279	N84	Hex(6)HexNAc(6)NeuAc(3)	6_6_0_3	Complex-Sialylated
P11279	N84	Hex(7)HexNAc(6)NeuAc(4)	7_6_0_4	Complex-Sialylated
P11279	N84	Hex(8)HexNAc(7)NeuAc(1)	8_7_0_1	Complex-Sialylated
P11279	N84	Hex(5)HexNAc(4)Fuc(3)	5_4_3_0	Complex/Hybrid-Fucosylated
P11279	N84	Hex(5)HexNAc(4)Fuc(1)NeuAc(1)	5_4_1_1	Complex/Hybrid-Sialofucosylated
P11279	N84	Hex(6)HexNAc(5)Fuc(1)NeuAc(2)	6_5_1_2	Complex/Hybrid-Sialofucosylated
P11279	N84	Hex(6)HexNAc(5)Fuc(2)NeuAc(2)	6_5_2_2	Complex/Hybrid-Sialofucosylated
P11279	N84	Hex(6)HexNAc(5)Fuc(3)NeuAc(1)	6_5_3_1	Complex/Hybrid-Sialofucosylated
P11279	N84	Hex(9)HexNAc(2)	9_2_0_0	High mannose
P11717	N112	Hex(7)HexNAc(6)	7_6_0_0	Complex
P11717	N112	Hex(5)HexNAc(4)Fuc(1)NeuAc(2)	5_4_1_2	Complex-Sialofucosylated
P11717	N2136	Hex(5)HexNAc(4)Fuc(1)NeuAc(2)	5_4_1_2	Complex-Sialofucosylated
P11717	N2136	Hex(5)HexNAc(4)Fuc(1)NeuAc(1)	5_4_1_1	Complex/Hybrid-Sialofucosylated
P11717	N2136	Hex(5)HexNAc(4)Fuc(2)NeuAc(1)	5_4_2_1	Complex/Hybrid-Sialofucosylated
P11717	N2136	Hex(5)HexNAc(4)Fuc(3)NeuAc(1)	5_4_3_1	Complex/Hybrid-Sialofucosylated
P11717	N2136	Hex(8)HexNAc(2)	8_2_0_0	High mannose
P11717	N2136	Hex(9)HexNAc(2)	9_2_0_0	High mannose
P11717	N400	Hex(7)HexNAc(2)	7_2_0_0	High mannose
P11717	N400	Hex(8)HexNAc(2)	8_2_0_0	High mannose
P11717	N400	Hex(9)HexNAc(2)	9_2_0_0	High mannose
P11717	N435	Hex(6)HexNAc(5)Fuc(1)NeuAc(3)	6_5_1_3	Complex-Sialofucosylated
P11717	N581	Hex(7)HexNAc(2)	7_2_0_0	High mannose
P11717	N581	Hex(8)HexNAc(2)	8_2_0_0	High mannose
P11717	N747	Hex(5)HexNAc(4)Fuc(1)NeuAc(2)	5_4_1_2	Complex-Sialofucosylated
P11717	N747	Hex(6)HexNAc(5)Fuc(1)NeuAc(3)	6_5_1_3	Complex-Sialofucosylated
P11717	N747	Hex(6)HexNAc(5)Fuc(1)NeuAc(1)	6_5_1_1	Complex/Hybrid-Sialofucosylated
P11717	N747	Hex(6)HexNAc(5)Fuc(1)NeuAc(2)	6_5_1_2	Complex/Hybrid-Sialofucosylated
P11717	N747	Hex(9)HexNAc(2)	9_2_0_0	High mannose
P11717	N871	Hex(5)HexNAc(4)Fuc(1)NeuAc(2)	5_4_1_2	Complex-Sialofucosylated
P11717	N871	Hex(5)HexNAc(4)Fuc(3)	5_4_3_0	Complex/Hybrid-Fucosylated
P11717	N871	Hex(5)HexNAc(4)Fuc(1)NeuAc(1)	5_4_1_1	Complex/Hybrid-Sialofucosylated
P11717	N871	Hex(5)HexNAc(4)Fuc(2)NeuAc(1)	5_4_2_1	Complex/Hybrid-Sialofucosylated
P11717	N871	Hex(9)HexNAc(2)	9_2_0_0	High mannose
P13473	N101	Hex(7)HexNAc(6)NeuAc(4)	7_6_0_4	Complex-Sialylated
P13473	N257	Hex(8)HexNAc(7)	8_7_0_0	Complex
P13473	N257	Hex(6)HexNAc(5)Fuc(4)	6_5_4_0	Complex-Fucosylated
P13473	N257	Hex(7)HexNAc(6)Fuc(1)	7_6_1_0	Complex-Fucosylated
P13473	N257	Hex(7)HexNAc(6)Fuc(2)	7_6_2_0	Complex-Fucosylated
P13473	N257	Hex(7)HexNAc(6)Fuc(3)	7_6_3_0	Complex-Fucosylated
P13473	N257	Hex(7)HexNAc(6)Fuc(4)	7_6_4_0	Complex-Fucosylated
P13473	N257	Hex(7)HexNAc(7)Fuc(2)	7_7_2_0	Complex-Fucosylated
P13473	N257	Hex(6)HexNAc(5)Fuc(1)NeuAc(3)	6_5_1_3	Complex-Sialofucosylated
P13473	N257	Hex(6)HexNAc(5)Fuc(4)NeuAc(1)	6_5_4_1	Complex-Sialofucosylated
P13473	N257	Hex(6)HexNAc(5)Fuc(4)NeuAc(2)	6_5_4_2	Complex-Sialofucosylated
P13473	N257	Hex(6)HexNAc(5)Fuc(4)NeuAc(3)	6_5_4_3	Complex-Sialofucosylated
P13473	N257	Hex(7)HexNAc(6)Fuc(1)NeuAc(1)	7_6_1_1	Complex-Sialofucosylated
P13473	N257	Hex(7)HexNAc(6)Fuc(1)NeuAc(2)	7_6_1_2	Complex-Sialofucosylated
P13473	N257	Hex(7)HexNAc(6)Fuc(2)NeuAc(1)	7_6_2_1	Complex-Sialofucosylated
P13473	N257	Hex(7)HexNAc(6)Fuc(3)NeuAc(1)	7_6_3_1	Complex-Sialofucosylated
P13473	N257	Hex(8)HexNAc(7)Fuc(1)NeuAc(1)	8_7_1_1	Complex-Sialofucosylated
P13473	N257	Hex(6)HexNAc(6)NeuAc(3)	6_6_0_3	Complex-Sialylated
P13473	N257	Hex(7)HexNAc(6)NeuAc(1)	7_6_0_1	Complex-Sialylated
P13473	N257	Hex(7)HexNAc(6)NeuAc(2)	7_6_0_2	Complex-Sialylated
P13473	N257	Hex(5)HexNAc(4)Fuc(1)	5_4_1_0	Complex/Hybrid-Fucosylated
P13473	N257	Hex(6)HexNAc(5)Fuc(1)	6_5_1_0	Complex/Hybrid-Fucosylated
P13473	N257	Hex(6)HexNAc(5)Fuc(2)	6_5_2_0	Complex/Hybrid-Fucosylated
P13473	N257	Hex(6)HexNAc(5)Fuc(3)	6_5_3_0	Complex/Hybrid-Fucosylated
P13473	N257	Hex(5)HexNAc(4)Fuc(1)NeuAc(1)	5_4_1_1	Complex/Hybrid-Sialofucosylated
P13473	N257	Hex(5)HexNAc(4)Fuc(2)NeuAc(1)	5_4_2_1	Complex/Hybrid-Sialofucosylated
P13473	N257	Hex(6)HexNAc(5)Fuc(1)NeuAc(1)	6_5_1_1	Complex/Hybrid-Sialofucosylated
P13473	N257	Hex(6)HexNAc(5)Fuc(1)NeuAc(2)	6_5_1_2	Complex/Hybrid-Sialofucosylated
P13473	N257	Hex(6)HexNAc(5)Fuc(2)NeuAc(1)	6_5_2_1	Complex/Hybrid-Sialofucosylated
P13473	N257	Hex(6)HexNAc(5)Fuc(2)NeuAc(2)	6_5_2_2	Complex/Hybrid-Sialofucosylated
P13473	N257	Hex(6)HexNAc(5)Fuc(3)NeuAc(1)	6_5_3_1	Complex/Hybrid-Sialofucosylated
P13473	N257	Hex(6)HexNAc(5)NeuAc(2)	6_5_0_2	Complex/Hybrid-Sialylated
P13473	N257	Hex(8)HexNAc(2)	8_2_0_0	High mannose
P13473	N257	Hex(9)HexNAc(2)	9_2_0_0	High mannose
P13473	N257	Hex(6)HexNAc(4)Fuc(1)NeuAc(1)	6_4_1_1	Hybrid-Sialofucosylated
P13473	N257	Hex(6)HexNAc(4)Fuc(3)NeuAc(2)	6_4_3_2	Hybrid-Sialofucosylated
P13473	N257	Hex(7)HexNAc(5)Fuc(1)NeuAc(1)	7_5_1_1	Hybrid-Sialofucosylated
P13473	N257	Hex(7)HexNAc(5)Fuc(2)NeuAc(1)	7_5_2_1	Hybrid-Sialofucosylated
P13473	N275	Hex(7)HexNAc(6)Fuc(1)NeuAc(2)	7_6_1_2	Complex-Sialofucosylated
P13473	N275	Hex(7)HexNAc(6)NeuAc(1)	7_6_0_1	Complex-Sialylated
P13473	N275	Hex(7)HexNAc(6)NeuAc(2)	7_6_0_2	Complex-Sialylated
P13473	N275	Hex(7)HexNAc(6)NeuAc(3)	7_6_0_3	Complex-Sialylated
P13473	N275	Hex(8)HexNAc(7)NeuAc(3)	8_7_0_3	Complex-Sialylated
P13473	N275	Hex(6)HexNAc(5)NeuAc(1)	6_5_0_1	Complex/Hybrid-Sialylated
P13473	N356	Hex(6)HexNAc(5)Fuc(4)	6_5_4_0	Complex-Fucosylated
P13473	N356	Hex(7)HexNAc(6)Fuc(2)	7_6_2_0	Complex-Fucosylated
P13473	N356	Hex(7)HexNAc(6)Fuc(1)NeuAc(1)	7_6_1_1	Complex-Sialofucosylated
P13473	N356	Hex(8)HexNAc(8)Fuc(2)NeuAc(1)	8_8_2_1	Complex-Sialofucosylated
P13473	N356	Hex(7)HexNAc(6)NeuAc(1)	7_6_0_1	Complex-Sialylated
P13473	N356	Hex(5)HexNAc(4)Fuc(3)	5_4_3_0	Complex/Hybrid-Fucosylated
P13473	N356	Hex(6)HexNAc(5)Fuc(1)	6_5_1_0	Complex/Hybrid-Fucosylated
P13473	N356	Hex(6)HexNAc(5)Fuc(2)	6_5_2_0	Complex/Hybrid-Fucosylated
P13473	N356	Hex(6)HexNAc(5)Fuc(3)	6_5_3_0	Complex/Hybrid-Fucosylated
P13473	N356	Hex(5)HexNAc(4)Fuc(1)NeuAc(1)	5_4_1_1	Complex/Hybrid-Sialofucosylated
P13473	N356	Hex(5)HexNAc(4)Fuc(2)NeuAc(1)	5_4_2_1	Complex/Hybrid-Sialofucosylated
P13473	N356	Hex(6)HexNAc(5)Fuc(1)NeuAc(1)	6_5_1_1	Complex/Hybrid-Sialofucosylated
P13473	N356	Hex(6)HexNAc(5)Fuc(1)NeuAc(2)	6_5_1_2	Complex/Hybrid-Sialofucosylated
P13473	N356	Hex(6)HexNAc(5)Fuc(2)NeuAc(1)	6_5_2_1	Complex/Hybrid-Sialofucosylated
P13473	N356	Hex(6)HexNAc(5)Fuc(3)NeuAc(1)	6_5_3_1	Complex/Hybrid-Sialofucosylated
P13473	N356	Hex(5)HexNAc(4)NeuAc(1)	5_4_0_1	Complex/Hybrid-Sialylated
P13473	N356	Hex(6)HexNAc(5)NeuAc(1)	6_5_0_1	Complex/Hybrid-Sialylated
P13473	N356	Hex(6)HexNAc(5)NeuAc(2)	6_5_0_2	Complex/Hybrid-Sialylated
P13473	N356	Hex(6)HexNAc(2)	6_2_0_0	High mannose
P13473	N356	Hex(7)HexNAc(2)	7_2_0_0	High mannose
P13473	N356	Hex(8)HexNAc(2)	8_2_0_0	High mannose
P13473	N356	Hex(6)HexNAc(3)NeuAc(1)	6_3_0_1	Hybrid-Sialylated
P13473	N75	Hex(7)HexNAc(6)Fuc(1)NeuAc(4)	7_6_1_4	Complex-Sialofucosylated
P13473	N75	Hex(7)HexNAc(6)Fuc(3)NeuAc(2)	7_6_3_2	Complex-Sialofucosylated
P13497	N91	Hex(3)HexNAc(6)	3_6_0_0	Complex
P13497	N91	Hex(5)HexNAc(6)	5_6_0_0	Complex
P13497	N91	Hex(9)HexNAc(2)	9_2_0_0	High mannose
P13612	N138	Hex(4)HexNAc(7)Fuc(2)	4_7_2_0	Complex-Fucosylated
P13612	N138	Hex(5)HexNAc(4)Fuc(1)NeuAc(2)	5_4_1_2	Complex-Sialofucosylated
P13612	N138	Hex(5)HexNAc(4)Fuc(1)NeuAc(1)	5_4_1_1	Complex/Hybrid-Sialofucosylated
P13612	N138	Hex(6)HexNAc(4)Fuc(2)	6_4_2_0	Hybrid-Fucosylated
P13612	N138	Hex(6)HexNAc(4)Fuc(2)NeuAc(1)	6_4_2_1	Hybrid-Sialofucosylated
P13987	N43	Hex(5)HexNAc(4)Fuc(1)NeuAc(2)	5_4_1_2	Complex-Sialofucosylated
P13987	N43	Hex(6)HexNAc(5)Fuc(4)NeuAc(1)	6_5_4_1	Complex-Sialofucosylated
P13987	N43	Hex(6)HexNAc(5)NeuAc(3)	6_5_0_3	Complex-Sialylated
P13987	N43	Hex(5)HexNAc(4)Fuc(1)NeuAc(1)	5_4_1_1	Complex/Hybrid-Sialofucosylated
P13987	N43	Hex(5)HexNAc(4)Fuc(2)NeuAc(1)	5_4_2_1	Complex/Hybrid-Sialofucosylated
P13987	N43	Hex(5)HexNAc(4)Fuc(3)NeuAc(1)	5_4_3_1	Complex/Hybrid-Sialofucosylated
P13987	N43	Hex(6)HexNAc(5)Fuc(2)NeuAc(2)	6_5_2_2	Complex/Hybrid-Sialofucosylated
P14625	N217	Hex(5)HexNAc(4)NeuAc(1)	5_4_0_1	Complex/Hybrid-Sialylated
P14625	N217	Hex(6)HexNAc(2)	6_2_0_0	High mannose
P14625	N217	Hex(8)HexNAc(2)	8_2_0_0	High mannose
P15144	N128	Hex(5)HexNAc(4)NeuAc(2)	5_4_0_2	Complex-Sialylated
P15144	N128	Hex(5)HexNAc(4)	5_4_0_0	Complex/Hybrid
P15144	N128	Hex(5)HexNAc(5)	5_5_0_0	Complex/Hybrid
P15144	N128	Hex(5)HexNAc(4)Fuc(1)	5_4_1_0	Complex/Hybrid-Fucosylated
P15144	N128	Hex(5)HexNAc(4)Fuc(2)	5_4_2_0	Complex/Hybrid-Fucosylated
P15144	N128	Hex(5)HexNAc(4)Fuc(1)NeuAc(1)	5_4_1_1	Complex/Hybrid-Sialofucosylated
P15144	N128	Hex(5)HexNAc(4)NeuAc(1)	5_4_0_1	Complex/Hybrid-Sialylated
P15144	N128	Hex(5)HexNAc(2)	5_2_0_0	High mannose
P15144	N128	Hex(6)HexNAc(2)	6_2_0_0	High mannose
P15144	N128	Hex(7)HexNAc(2)	7_2_0_0	High mannose
P15144	N128	Hex(8)HexNAc(2)	8_2_0_0	High mannose
P15144	N128	Hex(9)HexNAc(2)	9_2_0_0	High mannose
P15144	N234	Hex(5)HexNAc(4)Fuc(1)	5_4_1_0	Complex/Hybrid-Fucosylated
P15144	N234	Hex(5)HexNAc(4)Fuc(2)	5_4_2_0	Complex/Hybrid-Fucosylated
P15144	N234	Hex(5)HexNAc(4)NeuAc(1)	5_4_0_1	Complex/Hybrid-Sialylated
P15144	N234	Hex(6)HexNAc(5)NeuAc(1)	6_5_0_1	Complex/Hybrid-Sialylated
P15144	N234	Hex(6)HexNAc(5)NeuAc(2)	6_5_0_2	Complex/Hybrid-Sialylated
P15144	N234	Hex(5)HexNAc(3)Fuc(1)	5_3_1_0	Hybrid-Fucosylated
P15144	N234	Hex(6)HexNAc(3)NeuAc(1)	6_3_0_1	Hybrid-Sialylated
P15144	N265	Hex(4)HexNAc(5)Fuc(4)	4_5_4_0	Complex-Fucosylated
P15144	N265	Hex(5)HexNAc(4)Fuc(1)NeuAc(2)	5_4_1_2	Complex-Sialofucosylated
P15144	N265	Hex(5)HexNAc(5)Fuc(1)NeuAc(2)	5_5_1_2	Complex-Sialofucosylated
P15144	N265	Hex(5)HexNAc(5)Fuc(3)NeuAc(2)	5_5_3_2	Complex-Sialofucosylated
P15144	N265	Hex(5)HexNAc(6)Fuc(4)NeuAc(1)	5_6_4_1	Complex-Sialofucosylated
P15144	N265	Hex(7)HexNAc(6)Fuc(1)NeuAc(3)	7_6_1_3	Complex-Sialofucosylated
P15144	N265	Hex(5)HexNAc(4)NeuAc(2)	5_4_0_2	Complex-Sialylated
P15144	N265	Hex(6)HexNAc(5)NeuAc(3)	6_5_0_3	Complex-Sialylated
P15144	N265	Hex(5)HexNAc(4)Fuc(1)NeuAc(1)	5_4_1_1	Complex/Hybrid-Sialofucosylated
P15144	N265	Hex(6)HexNAc(5)Fuc(1)NeuAc(1)	6_5_1_1	Complex/Hybrid-Sialofucosylated
P15144	N265	Hex(6)HexNAc(5)Fuc(1)NeuAc(2)	6_5_1_2	Complex/Hybrid-Sialofucosylated
P15144	N265	Hex(6)HexNAc(5)Fuc(2)NeuAc(2)	6_5_2_2	Complex/Hybrid-Sialofucosylated
P15144	N265	Hex(5)HexNAc(4)NeuAc(1)	5_4_0_1	Complex/Hybrid-Sialylated
P15144	N265	Hex(6)HexNAc(5)NeuAc(1)	6_5_0_1	Complex/Hybrid-Sialylated
P15144	N265	Hex(6)HexNAc(5)NeuAc(2)	6_5_0_2	Complex/Hybrid-Sialylated
P15144	N681	Hex(7)HexNAc(5)Fuc(1)NeuAc(2)	7_5_1_2	Complex-Sialofucosylated
P15144	N681	Hex(7)HexNAc(6)Fuc(2)NeuAc(3)	7_6_2_3	Complex-Sialofucosylated
P15144	N681	Hex(6)HexNAc(5)NeuAc(3)	6_5_0_3	Complex-Sialylated
P15144	N681	Hex(7)HexNAc(6)NeuAc(2)	7_6_0_2	Complex-Sialylated
P15144	N681	Hex(7)HexNAc(6)NeuAc(3)	7_6_0_3	Complex-Sialylated
P15144	N681	Hex(7)HexNAc(6)NeuAc(4)	7_6_0_4	Complex-Sialylated
P15144	N681	Hex(5)HexNAc(4)NeuAc(1)	5_4_0_1	Complex/Hybrid-Sialylated
P15151	N120	Hex(8)HexNAc(7)	8_7_0_0	Complex
P15151	N120	Hex(5)HexNAc(4)Fuc(1)NeuAc(2)	5_4_1_2	Complex-Sialofucosylated
P15151	N120	Hex(6)HexNAc(5)Fuc(1)NeuAc(3)	6_5_1_3	Complex-Sialofucosylated
P15151	N120	Hex(5)HexNAc(4)Fuc(1)NeuAc(1)	5_4_1_1	Complex/Hybrid-Sialofucosylated
P15151	N120	Hex(5)HexNAc(4)Fuc(2)NeuAc(1)	5_4_2_1	Complex/Hybrid-Sialofucosylated
P15151	N120	Hex(5)HexNAc(4)Fuc(3)NeuAc(1)	5_4_3_1	Complex/Hybrid-Sialofucosylated
P15151	N120	Hex(6)HexNAc(5)Fuc(1)NeuAc(2)	6_5_1_2	Complex/Hybrid-Sialofucosylated
P15151	N120	Hex(6)HexNAc(5)Fuc(3)NeuAc(1)	6_5_3_1	Complex/Hybrid-Sialofucosylated
P15586	N362	Hex(7)HexNAc(2)	7_2_0_0	High mannose
P15586	N362	Hex(8)HexNAc(2)	8_2_0_0	High mannose
P15586	N362	Hex(9)HexNAc(2)	9_2_0_0	High mannose
P15586	N449	Hex(5)HexNAc(6)Fuc(1)NeuAc(2)	5_6_1_2	Complex-Sialofucosylated
P15586	N449	Hex(7)HexNAc(6)Fuc(1)NeuAc(2)	7_6_1_2	Complex-Sialofucosylated
P15586	N449	Hex(7)HexNAc(6)Fuc(3)NeuAc(1)	7_6_3_1	Complex-Sialofucosylated
P16070	N57	Hex(5)HexNAc(4)Fuc(1)NeuAc(2)	5_4_1_2	Complex-Sialofucosylated
P16070	N57	Hex(6)HexNAc(5)Fuc(1)NeuAc(3)	6_5_1_3	Complex-Sialofucosylated
P16070	N57	Hex(7)HexNAc(6)Fuc(1)NeuAc(4)	7_6_1_4	Complex-Sialofucosylated
P16144	N327	Hex(5)HexNAc(6)	5_6_0_0	Complex
P16144	N327	Hex(6)HexNAc(5)Fuc(1)NeuAc(3)	6_5_1_3	Complex-Sialofucosylated
P16144	N327	Hex(5)HexNAc(4)Fuc(3)	5_4_3_0	Complex/Hybrid-Fucosylated
P16144	N327	Hex(5)HexNAc(4)Fuc(1)NeuAc(1)	5_4_1_1	Complex/Hybrid-Sialofucosylated
P16144	N695	Hex(5)HexNAc(5)Fuc(1)NeuAc(1)	5_5_1_1	Complex/Hybrid-Sialofucosylated
P16422	N111	Hex(3)HexNAc(6)Fuc(4)	3_6_4_0	Complex-Fucosylated
P16422	N111	Hex(7)HexNAc(6)Fuc(1)	7_6_1_0	Complex-Fucosylated
P16422	N111	Hex(5)HexNAc(4)Fuc(1)NeuAc(2)	5_4_1_2	Complex-Sialofucosylated
P16422	N111	Hex(7)HexNAc(2)	7_2_0_0	High mannose
P16422	N111	Hex(8)HexNAc(2)	8_2_0_0	High mannose
P16422	N111	Hex(6)HexNAc(3)	6_3_0_0	Hybrid
P16422	N111	Hex(5)HexNAc(3)Fuc(1)	5_3_1_0	Hybrid-Fucosylated
P16422	N111	Hex(5)HexNAc(3)NeuAc(1)	5_3_0_1	Hybrid-Sialylated
P16422	N111	Hex(5)HexNAc(4)	5_3_0_0	Hybrid/Complex
P17301	N1057	Hex(5)HexNAc(4)Fuc(1)NeuAc(2)	5_4_1_2	Complex-Sialofucosylated
P17301	N1057	Hex(6)HexNAc(5)Fuc(1)NeuAc(3)	6_5_1_3	Complex-Sialofucosylated
P17301	N1057	Hex(5)HexNAc(4)Fuc(2)	5_4_2_0	Complex/Hybrid-Fucosylated
P17301	N1057	Hex(5)HexNAc(4)Fuc(3)	5_4_3_0	Complex/Hybrid-Fucosylated
P17301	N1057	Hex(5)HexNAc(4)Fuc(1)NeuAc(1)	5_4_1_1	Complex/Hybrid-Sialofucosylated
P17301	N1057	Hex(5)HexNAc(4)Fuc(2)NeuAc(1)	5_4_2_1	Complex/Hybrid-Sialofucosylated
P17301	N1057	Hex(6)HexNAc(5)Fuc(1)NeuAc(1)	6_5_1_1	Complex/Hybrid-Sialofucosylated
P17301	N1057	Hex(6)HexNAc(5)Fuc(1)NeuAc(2)	6_5_1_2	Complex/Hybrid-Sialofucosylated
P17301	N1057	Hex(6)HexNAc(5)Fuc(3)NeuAc(1)	6_5_3_1	Complex/Hybrid-Sialofucosylated
P17301	N1057	Hex(6)HexNAc(5)Fuc(3)NeuAc(2)	6_5_3_2	Complex/Hybrid-Sialofucosylated
P17301	N343	Hex(5)HexNAc(4)NeuAc(2)	5_4_0_2	Complex-Sialylated
P17301	N343	Hex(6)HexNAc(5)NeuAc(3)	6_5_0_3	Complex-Sialylated
P17301	N343	Hex(5)HexNAc(4)NeuAc(1)	5_4_0_1	Complex/Hybrid-Sialylated
P17301	N432	Hex(7)HexNAc(2)	7_2_0_0	High mannose
P17301	N432	Hex(8)HexNAc(2)	8_2_0_0	High mannose
P18084	N477	Hex(6)HexNAc(5)Fuc(1)NeuAc(3)	6_5_1_3	Complex-Sialofucosylated
P18084	N477	Hex(7)HexNAc(6)Fuc(1)NeuAc(4)	7_6_1_4	Complex-Sialofucosylated
P18084	N477	Hex(5)HexNAc(4)Fuc(3)NeuAc(1)	5_4_3_1	Complex/Hybrid-Sialofucosylated
P18084	N586	Hex(6)HexNAc(2)	6_2_0_0	High mannose
P18084	N586	Hex(8)HexNAc(2)	8_2_0_0	High mannose
P18084	N654	Hex(5)HexNAc(4)Fuc(1)NeuAc(1)	5_4_1_1	Complex/Hybrid-Sialofucosylated
P18084	N654	Hex(8)HexNAc(2)	8_2_0_0	High mannose
P20645	N83	Hex(6)HexNAc(5)Fuc(4)	6_5_4_0	Complex-Fucosylated
P20645	N83	Hex(5)HexNAc(4)Fuc(1)NeuAc(2)	5_4_1_2	Complex-Sialofucosylated
P20645	N83	Hex(6)HexNAc(5)Fuc(1)NeuAc(3)	6_5_1_3	Complex-Sialofucosylated
P20645	N83	Hex(6)HexNAc(5)Fuc(4)NeuAc(1)	6_5_4_1	Complex-Sialofucosylated
P20645	N83	Hex(8)HexNAc(7)NeuAc(1)	8_7_0_1	Complex-Sialylated
P20645	N83	Hex(5)HexNAc(4)Fuc(3)	5_4_3_0	Complex/Hybrid-Fucosylated
P20645	N83	Hex(5)HexNAc(4)Fuc(1)NeuAc(1)	5_4_1_1	Complex/Hybrid-Sialofucosylated
P20645	N83	Hex(5)HexNAc(4)Fuc(2)NeuAc(1)	5_4_2_1	Complex/Hybrid-Sialofucosylated
P20645	N83	Hex(5)HexNAc(4)Fuc(3)NeuAc(1)	5_4_3_1	Complex/Hybrid-Sialofucosylated
P20645	N83	Hex(6)HexNAc(5)Fuc(1)NeuAc(1)	6_5_1_1	Complex/Hybrid-Sialofucosylated
P20645	N83	Hex(6)HexNAc(5)Fuc(1)NeuAc(2)	6_5_1_2	Complex/Hybrid-Sialofucosylated
P20645	N83	Hex(6)HexNAc(5)Fuc(2)NeuAc(1)	6_5_2_1	Complex/Hybrid-Sialofucosylated
P20645	N83	Hex(6)HexNAc(5)Fuc(2)NeuAc(2)	6_5_2_2	Complex/Hybrid-Sialofucosylated
P20645	N83	Hex(6)HexNAc(5)Fuc(3)NeuAc(1)	6_5_3_1	Complex/Hybrid-Sialofucosylated
P21589	N333	Hex(5)HexNAc(4)Fuc(1)NeuAc(2)	5_4_1_2	Complex-Sialofucosylated
P21589	N333	Hex(6)HexNAc(5)Fuc(1)NeuAc(3)	6_5_1_3	Complex-Sialofucosylated
P21589	N333	Hex(7)HexNAc(6)Fuc(1)NeuAc(1)	7_6_1_1	Complex-Sialofucosylated
P21589	N333	Hex(7)HexNAc(6)Fuc(1)NeuAc(3)	7_6_1_3	Complex-Sialofucosylated
P21589	N333	Hex(5)HexNAc(4)Fuc(1)NeuAc(1)	5_4_1_1	Complex/Hybrid-Sialofucosylated
P21589	N333	Hex(5)HexNAc(4)Fuc(2)NeuAc(1)	5_4_2_1	Complex/Hybrid-Sialofucosylated
P21589	N333	Hex(6)HexNAc(5)Fuc(1)NeuAc(1)	6_5_1_1	Complex/Hybrid-Sialofucosylated
P21589	N333	Hex(6)HexNAc(5)Fuc(1)NeuAc(2)	6_5_1_2	Complex/Hybrid-Sialofucosylated
P23229	N323	Hex(8)HexNAc(2)	8_2_0_0	High mannose
P23229	N770	Hex(5)HexNAc(4)Fuc(1)	5_4_1_0	Complex/Hybrid-Fucosylated
P23229	N770	Hex(5)HexNAc(4)Fuc(1)NeuAc(1)	5_4_1_1	Complex/Hybrid-Sialofucosylated
P23229	N770	Hex(7)HexNAc(2)	7_2_0_0	High mannose
P23229	N966	Hex(8)HexNAc(2)	8_2_0_0	High mannose
P25942	N153	Hex(5)HexNAc(4)Fuc(1)NeuAc(2)	5_4_1_2	Complex-Sialofucosylated
P25942	N153	Hex(5)HexNAc(4)NeuAc(2)	5_4_0_2	Complex-Sialylated
P25942	N153	Hex(5)HexNAc(4)Fuc(1)NeuAc(1)	5_4_1_1	Complex/Hybrid-Sialofucosylated
P25942	N153	Hex(6)HexNAc(4)NeuAc(1)	6_4_0_1	Hybrid-Sialylated
P25942	N153	Hex(6)HexNAc(4)NeuAc(2)	6_4_0_2	Hybrid-Sialylated
P26006	N107	Hex(5)HexNAc(4)Fuc(1)NeuAc(2)	5_4_1_2	Complex-Sialofucosylated
P26006	N107	Hex(5)HexNAc(6)Fuc(1)NeuAc(2)	5_6_1_2	Complex-Sialofucosylated
P26006	N107	Hex(6)HexNAc(5)Fuc(1)NeuAc(3)	6_5_1_3	Complex-Sialofucosylated
P26006	N107	Hex(6)HexNAc(5)Fuc(2)NeuAc(3)	6_5_2_3	Complex-Sialofucosylated
P26006	N107	Hex(6)HexNAc(6)Fuc(1)NeuAc(3)	6_6_1_3	Complex-Sialofucosylated
P26006	N107	Hex(6)HexNAc(6)Fuc(2)NeuAc(2)	6_6_2_2	Complex-Sialofucosylated
P26006	N107	Hex(7)HexNAc(6)Fuc(1)NeuAc(4)	7_6_1_4	Complex-Sialofucosylated
P26006	N107	Hex(8)HexNAc(7)NeuAc(1)	8_7_0_1	Complex-Sialylated
P26006	N107	Hex(9)HexNAc(2)	9_2_0_0	High mannose
P26006	N265	Hex(5)HexNAc(4)Fuc(1)NeuAc(2)	5_4_1_2	Complex-Sialofucosylated
P26006	N265	Hex(5)HexNAc(4)NeuAc(2)	5_4_0_2	Complex-Sialylated
P26006	N265	Hex(5)HexNAc(4)Fuc(1)NeuAc(1)	5_4_1_1	Complex/Hybrid-Sialofucosylated
P26006	N265	Hex(5)HexNAc(4)NeuAc(1)	5_4_0_1	Complex/Hybrid-Sialylated
P26006	N265	Hex(6)HexNAc(5)NeuAc(2)	6_5_0_2	Complex/Hybrid-Sialylated
P26006	N265	Hex(6)HexNAc(2)	6_2_0_0	High mannose
P26006	N265	Hex(6)HexNAc(4)Fuc(1)NeuAc(1)	6_4_1_1	Hybrid-Sialofucosylated
P26006	N265	Hex(5)HexNAc(3)NeuAc(1)	5_3_0_1	Hybrid-Sialylated
P26006	N511	Hex(5)HexNAc(4)NeuAc(2)	5_4_0_2	Complex-Sialylated
P26006	N511	Hex(4)HexNAc(5)Fuc(2)	4_5_2_0	Complex/Hybrid-Fucosylated
P26006	N511	Hex(5)HexNAc(4)Fuc(2)	5_4_2_0	Complex/Hybrid-Fucosylated
P26006	N511	Hex(5)HexNAc(4)Fuc(1)NeuAc(1)	5_4_1_1	Complex/Hybrid-Sialofucosylated
P26006	N511	Hex(5)HexNAc(4)Fuc(2)NeuAc(1)	5_4_2_1	Complex/Hybrid-Sialofucosylated
P26006	N605	Hex(6)HexNAc(2)	6_2_0_0	High mannose
P26006	N605	Hex(7)HexNAc(2)	7_2_0_0	High mannose
P26006	N605	Hex(8)HexNAc(2)	8_2_0_0	High mannose
P26006	N605	Hex(9)HexNAc(2)	9_2_0_0	High mannose
P26006	N86	Hex(5)HexNAc(4)Fuc(1)NeuAc(2)	5_4_1_2	Complex-Sialofucosylated
P26006	N86	Hex(6)HexNAc(5)Fuc(1)NeuAc(3)	6_5_1_3	Complex-Sialofucosylated
P26006	N86	Hex(6)HexNAc(5)Fuc(1)NeuAc(2)	6_5_1_2	Complex/Hybrid-Sialofucosylated
P26006	N86	Hex(10)HexNAc(2)	10_2_0_0	High mannose
P26006	N86	Hex(9)HexNAc(2)	9_2_0_0	High mannose
P26006	N926	Hex(5)HexNAc(4)	5_4_0_0	Complex/Hybrid
P26006	N926	Hex(6)HexNAc(5)Fuc(1)	6_5_1_0	Complex/Hybrid-Fucosylated
P26006	N926	Hex(6)HexNAc(5)Fuc(2)	6_5_2_0	Complex/Hybrid-Fucosylated
P26006	N926	Hex(6)HexNAc(5)Fuc(3)	6_5_3_0	Complex/Hybrid-Fucosylated
P26006	N926	Hex(6)HexNAc(5)Fuc(1)NeuAc(1)	6_5_1_1	Complex/Hybrid-Sialofucosylated
P26006	N926	Hex(6)HexNAc(5)Fuc(2)NeuAc(1)	6_5_2_1	Complex/Hybrid-Sialofucosylated
P26006	N926	Hex(6)HexNAc(5)NeuAc(1)	6_5_0_1	Complex/Hybrid-Sialylated
P26006	N926	Hex(6)HexNAc(5)NeuAc(2)	6_5_0_2	Complex/Hybrid-Sialylated
P26006	N926	Hex(8)HexNAc(2)	8_2_0_0	High mannose
P26006	N926	Hex(9)HexNAc(2)	9_2_0_0	High mannose
P26006	N969	Hex(6)HexNAc(5)Fuc(2)	6_5_2_0	Complex/Hybrid-Fucosylated
P26006	N969	Hex(6)HexNAc(5)Fuc(1)NeuAc(1)	6_5_1_1	Complex/Hybrid-Sialofucosylated
P26006	N969	Hex(6)HexNAc(5)Fuc(2)NeuAc(1)	6_5_2_1	Complex/Hybrid-Sialofucosylated
P26006	N969	Hex(5)HexNAc(4)NeuAc(1)	5_4_0_1	Complex/Hybrid-Sialylated
P26006	N969	Hex(6)HexNAc(5)NeuAc(1)	6_5_0_1	Complex/Hybrid-Sialylated
P26006	N969	Hex(7)HexNAc(2)	7_2_0_0	High mannose
P27487	N150	Hex(6)HexNAc(5)Fuc(1)NeuAc(3)	6_5_1_3	Complex-Sialofucosylated
P28799	N368	Hex(8)HexNAc(2)	8_2_0_0	High mannose
P28799	N530	Hex(8)HexNAc(2)	8_2_0_0	High mannose
P28799	N530	Hex(9)HexNAc(2)	9_2_0_0	High mannose
P30443	N110	Hex(4)HexNAc(5)Fuc(1)NeuAc(2)	4_5_1_2	Complex-Sialofucosylated
P30443	N110	Hex(4)HexNAc(5)Fuc(2)NeuAc(1)	4_5_2_1	Complex-Sialofucosylated
P30443	N110	Hex(5)HexNAc(4)Fuc(1)NeuAc(2)	5_4_1_2	Complex-Sialofucosylated
P30443	N110	Hex(5)HexNAc(4)NeuAc(2)	5_4_0_2	Complex-Sialylated
P30443	N110	Hex(5)HexNAc(4)Fuc(3)NeuAc(1)	5_4_3_1	Complex/Hybrid-Sialofucosylated
P30462	N110	Hex(4)HexNAc(6)	4_6_0_0	Complex
P30462	N110	Hex(5)HexNAc(4)NeuAc(2)	5_4_0_2	Complex-Sialylated
P30462	N110	Hex(8)HexNAc(2)	8_2_0_0	High mannose
P30464	N110	Hex(5)HexNAc(4)Fuc(1)NeuAc(2)	5_4_1_2	Complex-Sialofucosylated
P30464	N110	Hex(6)HexNAc(5)Fuc(1)NeuAc(3)	6_5_1_3	Complex-Sialofucosylated
P30511	N107	Hex(10)HexNAc(2)	10_2_0_0	High mannose
P30511	N107	Hex(9)HexNAc(2)	9_2_0_0	High mannose
P32004	N247	Hex(5)HexNAc(4)Fuc(2)NeuAc(1)	5_4_2_1	Complex/Hybrid-Sialofucosylated
P32004	N433	Hex(5)HexNAc(6)Fuc(3)NeuAc(2)	5_6_3_2	Complex-Sialofucosylated
P32004	N433	Hex(6)HexNAc(5)Fuc(1)NeuAc(3)	6_5_1_3	Complex-Sialofucosylated
P32004	N433	Hex(7)HexNAc(6)Fuc(1)NeuAc(3)	7_6_1_3	Complex-Sialofucosylated
P32004	N433	Hex(7)HexNAc(6)Fuc(1)NeuAc(4)	7_6_1_4	Complex-Sialofucosylated
P32004	N433	Hex(7)HexNAc(6)Fuc(2)NeuAc(4)	7_6_2_4	Complex-Sialofucosylated
P32004	N433	Hex(7)HexNAc(6)Fuc(4)NeuAc(3)	7_6_4_3	Complex-Sialofucosylated
P32004	N433	Hex(7)HexNAc(6)Fuc(5)NeuAc(2)	7_6_5_2	Complex-Sialofucosylated
P32004	N671	Hex(5)HexNAc(4)Fuc(1)NeuAc(2)	5_4_1_2	Complex-Sialofucosylated
P32004	N671	Hex(5)HexNAc(5)Fuc(1)NeuAc(2)	5_5_1_2	Complex-Sialofucosylated
P32004	N671	Hex(6)HexNAc(5)Fuc(1)NeuAc(3)	6_5_1_3	Complex-Sialofucosylated
P32004	N671	Hex(5)HexNAc(4)Fuc(1)NeuAc(1)	5_4_1_1	Complex/Hybrid-Sialofucosylated
P32004	N671	Hex(6)HexNAc(5)Fuc(1)NeuAc(2)	6_5_1_2	Complex/Hybrid-Sialofucosylated
P32004	N777	Hex(6)HexNAc(5)Fuc(1)NeuAc(3)	6_5_1_3	Complex-Sialofucosylated
P32004	N777	Hex(7)HexNAc(6)Fuc(1)NeuAc(4)	7_6_1_4	Complex-Sialofucosylated
P32004	N979	Hex(5)HexNAc(6)Fuc(4)	5_6_4_0	Complex-Fucosylated
P32004	N979	Hex(6)HexNAc(5)Fuc(4)	6_5_4_0	Complex-Fucosylated
P32004	N979	Hex(6)HexNAc(6)Fuc(4)	6_6_4_0	Complex-Fucosylated
P32004	N979	Hex(4)HexNAc(5)Fuc(1)NeuAc(1)	4_5_1_1	Complex-Sialofucosylated
P32004	N979	Hex(5)HexNAc(6)Fuc(2)NeuAc(1)	5_6_2_1	Complex-Sialofucosylated
P32004	N979	Hex(6)HexNAc(5)Fuc(1)NeuAc(3)	6_5_1_3	Complex-Sialofucosylated
P32004	N979	Hex(6)HexNAc(5)Fuc(4)NeuAc(1)	6_5_4_1	Complex-Sialofucosylated
P32004	N979	Hex(7)HexNAc(6)Fuc(1)NeuAc(2)	7_6_1_2	Complex-Sialofucosylated
P32004	N979	Hex(6)HexNAc(5)NeuAc(3)	6_5_0_3	Complex-Sialylated
P32004	N979	Hex(4)HexNAc(4)Fuc(2)	4_4_2_0	Complex/Hybrid-Fucosylated
P32004	N979	Hex(4)HexNAc(5)Fuc(1)	4_5_1_0	Complex/Hybrid-Fucosylated
P32004	N979	Hex(4)HexNAc(5)Fuc(3)	4_5_3_0	Complex/Hybrid-Fucosylated
P32004	N979	Hex(5)HexNAc(4)Fuc(2)	5_4_2_0	Complex/Hybrid-Fucosylated
P32004	N979	Hex(5)HexNAc(4)Fuc(3)	5_4_3_0	Complex/Hybrid-Fucosylated
P32004	N979	Hex(5)HexNAc(5)Fuc(3)	5_5_3_0	Complex/Hybrid-Fucosylated
P32004	N979	Hex(6)HexNAc(5)Fuc(3)	6_5_3_0	Complex/Hybrid-Fucosylated
P32004	N979	Hex(5)HexNAc(4)Fuc(1)NeuAc(1)	5_4_1_1	Complex/Hybrid-Sialofucosylated
P32004	N979	Hex(5)HexNAc(4)Fuc(2)NeuAc(1)	5_4_2_1	Complex/Hybrid-Sialofucosylated
P32004	N979	Hex(5)HexNAc(5)Fuc(1)NeuAc(1)	5_5_1_1	Complex/Hybrid-Sialofucosylated
P32004	N979	Hex(6)HexNAc(5)Fuc(1)NeuAc(1)	6_5_1_1	Complex/Hybrid-Sialofucosylated
P32004	N979	Hex(6)HexNAc(5)Fuc(1)NeuAc(2)	6_5_1_2	Complex/Hybrid-Sialofucosylated
P32004	N979	Hex(6)HexNAc(5)Fuc(2)NeuAc(1)	6_5_2_1	Complex/Hybrid-Sialofucosylated
P32004	N979	Hex(6)HexNAc(5)Fuc(2)NeuAc(2)	6_5_2_2	Complex/Hybrid-Sialofucosylated
P32004	N979	Hex(6)HexNAc(5)Fuc(3)NeuAc(1)	6_5_3_1	Complex/Hybrid-Sialofucosylated
P32004	N979	Hex(6)HexNAc(5)NeuAc(2)	6_5_0_2	Complex/Hybrid-Sialylated
P36941	N177	Hex(5)HexNAc(4)Fuc(3)NeuAc(1)	5_4_3_1	Complex/Hybrid-Sialofucosylated
P36941	N177	Hex(9)HexNAc(2)	9_2_0_0	High mannose
P42892	N166	Hex(5)HexNAc(4)Fuc(1)	5_4_1_0	Complex/Hybrid-Fucosylated
P42892	N166	Hex(5)HexNAc(4)Fuc(1)NeuAc(1)	5_4_1_1	Complex/Hybrid-Sialofucosylated
P42892	N166	Hex(5)HexNAc(4)Fuc(2)NeuAc(1)	5_4_2_1	Complex/Hybrid-Sialofucosylated
P42892	N166	Hex(10)HexNAc(2)	10_2_0_0	High mannose
P42892	N166	Hex(6)HexNAc(2)	6_2_0_0	High mannose
P42892	N166	Hex(7)HexNAc(2)	7_2_0_0	High mannose
P42892	N166	Hex(8)HexNAc(2)	8_2_0_0	High mannose
P42892	N166	Hex(9)HexNAc(2)	9_2_0_0	High mannose
P42892	N210	Hex(6)HexNAc(5)Fuc(1)NeuAc(3)	6_5_1_3	Complex-Sialofucosylated
P42892	N210	Hex(7)HexNAc(6)Fuc(2)NeuAc(3)	7_6_2_3	Complex-Sialofucosylated
P42892	N210	Hex(7)HexNAc(6)Fuc(4)NeuAc(2)	7_6_4_2	Complex-Sialofucosylated
P42892	N210	Hex(6)HexNAc(5)NeuAc(3)	6_5_0_3	Complex-Sialylated
P42892	N210	Hex(7)HexNAc(6)NeuAc(4)	7_6_0_4	Complex-Sialylated
P42892	N210	Hex(9)HexNAc(8)NeuAc(4)	9_8_0_4	Complex-Sialylated
P42892	N270	Hex(6)HexNAc(5)Fuc(1)NeuAc(3)	6_5_1_3	Complex-Sialofucosylated
P42892	N270	Hex(7)HexNAc(6)Fuc(1)NeuAc(2)	7_6_1_2	Complex-Sialofucosylated
P42892	N270	Hex(7)HexNAc(6)Fuc(1)NeuAc(3)	7_6_1_3	Complex-Sialofucosylated
P42892	N270	Hex(6)HexNAc(5)Fuc(1)NeuAc(2)	6_5_1_2	Complex/Hybrid-Sialofucosylated
P43307	N136	Hex(3)HexNAc(7)	3_7_0_0	Complex
P43307	N136	Hex(8)HexNAc(2)	8_2_0_0	High mannose
P43307	N136	Hex(9)HexNAc(2)	9_2_0_0	High mannose
P43308	N88	Hex(8)HexNAc(2)	8_2_0_0	High mannose
P43308	N88	Hex(9)HexNAc(2)	9_2_0_0	High mannose
P48509	N159	Hex(7)HexNAc(7)Fuc(1)	7_7_1_0	Complex-Fucosylated
P48509	N159	Hex(4)HexNAc(4)Fuc(2)NeuAc(1)	4_4_2_1	Complex-Sialofucosylated
P48509	N159	Hex(5)HexNAc(5)Fuc(1)NeuAc(2)	5_5_1_2	Complex-Sialofucosylated
P48509	N159	Hex(5)HexNAc(5)Fuc(2)NeuAc(2)	5_5_2_2	Complex-Sialofucosylated
P48509	N159	Hex(5)HexNAc(5)Fuc(4)NeuAc(1)	5_5_4_1	Complex-Sialofucosylated
P48509	N159	Hex(5)HexNAc(4)NeuAc(2)	5_4_0_2	Complex-Sialylated
P48509	N159	Hex(6)HexNAc(5)NeuAc(3)	6_5_0_3	Complex-Sialylated
P48509	N159	Hex(5)HexNAc(4)Fuc(1)	5_4_1_0	Complex/Hybrid-Fucosylated
P48509	N159	Hex(5)HexNAc(4)Fuc(2)	5_4_2_0	Complex/Hybrid-Fucosylated
P48509	N159	Hex(5)HexNAc(4)Fuc(3)	5_4_3_0	Complex/Hybrid-Fucosylated
P48509	N159	Hex(5)HexNAc(4)Fuc(1)NeuAc(1)	5_4_1_1	Complex/Hybrid-Sialofucosylated
P48509	N159	Hex(6)HexNAc(5)Fuc(1)NeuAc(1)	6_5_1_1	Complex/Hybrid-Sialofucosylated
P48509	N159	Hex(6)HexNAc(5)Fuc(1)NeuAc(2)	6_5_1_2	Complex/Hybrid-Sialofucosylated
P48509	N159	Hex(6)HexNAc(5)Fuc(2)NeuAc(1)	6_5_2_1	Complex/Hybrid-Sialofucosylated
P48509	N159	Hex(6)HexNAc(5)Fuc(2)NeuAc(2)	6_5_2_2	Complex/Hybrid-Sialofucosylated
P48509	N159	Hex(6)HexNAc(5)Fuc(3)NeuAc(1)	6_5_3_1	Complex/Hybrid-Sialofucosylated
P48509	N159	Hex(5)HexNAc(4)NeuAc(1)	5_4_0_1	Complex/Hybrid-Sialylated
P48509	N159	Hex(6)HexNAc(5)NeuAc(2)	6_5_0_2	Complex/Hybrid-Sialylated
P48509	N159	Hex(7)HexNAc(2)	7_2_0_0	High mannose
P48960	N108	Hex(5)HexNAc(4)Fuc(1)NeuAc(2)	5_4_1_2	Complex-Sialofucosylated
P48960	N33	Hex(6)HexNAc(5)Fuc(3)NeuAc(1)	6_5_3_1	Complex/Hybrid-Sialofucosylated
P48960	N371	Hex(5)HexNAc(4)Fuc(1)NeuAc(1)	5_4_1_1	Complex/Hybrid-Sialofucosylated
P48960	N371	Hex(6)HexNAc(5)Fuc(1)NeuAc(1)	6_5_1_1	Complex/Hybrid-Sialofucosylated
P48960	N38	Hex(8)HexNAc(7)Fuc(2)	8_7_2_0	Complex-Fucosylated
P48960	N38	Hex(4)HexNAc(5)Fuc(1)NeuAc(2)	4_5_1_2	Complex-Sialofucosylated
P48960	N38	Hex(5)HexNAc(4)Fuc(1)NeuAc(2)	5_4_1_2	Complex-Sialofucosylated
P48960	N38	Hex(9)HexNAc(2)	9_2_0_0	High mannose
P50454	N120	Hex(5)HexNAc(7)Fuc(3)NeuAc(1)	5_7_3_1	Complex-Sialofucosylated
P50454	N120	Hex(7)HexNAc(2)	7_2_0_0	High mannose
P50454	N120	Hex(8)HexNAc(2)	8_2_0_0	High mannose
P50454	N120	Hex(9)HexNAc(2)	9_2_0_0	High mannose
P50454	N125	Hex(7)HexNAc(2)	7_2_0_0	High mannose
P50454	N125	Hex(8)HexNAc(2)	8_2_0_0	High mannose
P50454	N125	Hex(9)HexNAc(2)	9_2_0_0	High mannose
P53634	N119	Hex(7)HexNAc(2)	7_2_0_0	High mannose
P53634	N276	Hex(3)HexNAc(5)Fuc(1)	3_5_1_0	Complex-Fucosylated
P53634	N276	Hex(5)HexNAc(4)	5_4_0_0	Complex/Hybrid
P53634	N276	Hex(4)HexNAc(5)Fuc(2)	4_5_2_0	Complex/Hybrid-Fucosylated
P53634	N276	Hex(5)HexNAc(5)Fuc(1)	5_5_1_0	Complex/Hybrid-Fucosylated
P53634	N276	Hex(5)HexNAc(2)	5_2_0_0	High mannose
P53634	N276	Hex(6)HexNAc(2)	6_2_0_0	High mannose
P53634	N276	Hex(7)HexNAc(2)	7_2_0_0	High mannose
P53634	N276	Hex(8)HexNAc(2)	8_2_0_0	High mannose
P53634	N53	Hex(6)HexNAc(2)	6_2_0_0	High mannose
P53801	N54	Hex(6)HexNAc(2)	6_2_0_0	High mannose
P53801	N54	Hex(7)HexNAc(2)	7_2_0_0	High mannose
P53801	N54	Hex(8)HexNAc(2)	8_2_0_0	High mannose
P54709	N124	Hex(6)HexNAc(5)Fuc(4)	6_5_4_0	Complex-Fucosylated
P54709	N124	Hex(7)HexNAc(6)Fuc(4)	7_6_4_0	Complex-Fucosylated
P54709	N124	Hex(7)HexNAc(6)Fuc(5)	7_6_5_0	Complex-Fucosylated
P54709	N124	Hex(5)HexNAc(4)Fuc(1)NeuAc(2)	5_4_1_2	Complex-Sialofucosylated
P54709	N124	Hex(6)HexNAc(5)Fuc(4)NeuAc(2)	6_5_4_2	Complex-Sialofucosylated
P54709	N124	Hex(7)HexNAc(6)Fuc(1)NeuAc(1)	7_6_1_1	Complex-Sialofucosylated
P54709	N124	Hex(7)HexNAc(6)Fuc(1)NeuAc(2)	7_6_1_2	Complex-Sialofucosylated
P54709	N124	Hex(7)HexNAc(6)Fuc(1)NeuAc(3)	7_6_1_3	Complex-Sialofucosylated
P54709	N124	Hex(7)HexNAc(6)Fuc(2)NeuAc(1)	7_6_2_1	Complex-Sialofucosylated
P54709	N124	Hex(7)HexNAc(6)Fuc(3)NeuAc(1)	7_6_3_1	Complex-Sialofucosylated
P54709	N124	Hex(7)HexNAc(6)Fuc(3)NeuAc(2)	7_6_3_2	Complex-Sialofucosylated
P54709	N124	Hex(8)HexNAc(7)Fuc(1)NeuAc(1)	8_7_1_1	Complex-Sialofucosylated
P54709	N124	Hex(8)HexNAc(7)Fuc(3)NeuAc(1)	8_7_3_1	Complex-Sialofucosylated
P54709	N124	Hex(7)HexNAc(6)NeuAc(2)	7_6_0_2	Complex-Sialylated
P54709	N124	Hex(5)HexNAc(4)Fuc(2)	5_4_2_0	Complex/Hybrid-Fucosylated
P54709	N124	Hex(5)HexNAc(4)Fuc(3)	5_4_3_0	Complex/Hybrid-Fucosylated
P54709	N124	Hex(6)HexNAc(5)Fuc(2)	6_5_2_0	Complex/Hybrid-Fucosylated
P54709	N124	Hex(6)HexNAc(5)Fuc(3)	6_5_3_0	Complex/Hybrid-Fucosylated
P54709	N124	Hex(5)HexNAc(4)Fuc(1)NeuAc(1)	5_4_1_1	Complex/Hybrid-Sialofucosylated
P54709	N124	Hex(5)HexNAc(4)Fuc(2)NeuAc(1)	5_4_2_1	Complex/Hybrid-Sialofucosylated
P54709	N124	Hex(5)HexNAc(4)Fuc(3)NeuAc(1)	5_4_3_1	Complex/Hybrid-Sialofucosylated
P54709	N124	Hex(6)HexNAc(5)Fuc(1)NeuAc(1)	6_5_1_1	Complex/Hybrid-Sialofucosylated
P54709	N124	Hex(6)HexNAc(5)Fuc(1)NeuAc(2)	6_5_1_2	Complex/Hybrid-Sialofucosylated
P54709	N124	Hex(6)HexNAc(5)Fuc(2)NeuAc(1)	6_5_2_1	Complex/Hybrid-Sialofucosylated
P54709	N124	Hex(8)HexNAc(2)	8_2_0_0	High mannose
P54709	N124	Hex(6)HexNAc(4)Fuc(3)	6_4_3_0	Hybrid-Fucosylated
P54709	N124	Hex(6)HexNAc(4)Fuc(1)NeuAc(1)	6_4_1_1	Hybrid-Sialofucosylated
P55268	N1348	Hex(6)HexNAc(5)NeuAc(3)	6_5_0_3	Complex-Sialylated
P55268	N1348	Hex(8)HexNAc(2)	8_2_0_0	High mannose
P55899	N125	Hex(4)HexNAc(5)Fuc(2)NeuAc(1)	4_5_2_1	Complex-Sialofucosylated
P55899	N125	Hex(5)HexNAc(4)Fuc(1)NeuAc(2)	5_4_1_2	Complex-Sialofucosylated
P55899	N125	Hex(5)HexNAc(4)Fuc(3)NeuAc(1)	5_4_3_1	Complex/Hybrid-Sialofucosylated
P56199	N1113	Hex(8)HexNAc(2)	8_2_0_0	High mannose
P56199	N460	Hex(9)HexNAc(2)	9_2_0_0	High mannose
P78310	N106	Hex(5)HexNAc(4)NeuAc(2)	5_4_0_2	Complex-Sialylated
P78310	N106	Hex(5)HexNAc(4)Fuc(2)NeuAc(1)	5_4_2_1	Complex/Hybrid-Sialofucosylated
P78310	N106	Hex(6)HexNAc(4)Fuc(1)NeuAc(1)	6_4_1_1	Hybrid-Sialofucosylated
P78410	N115	Hex(5)HexNAc(4)Fuc(1)NeuAc(2)	5_4_1_2	Complex-Sialofucosylated
P78410	N115	Hex(8)HexNAc(2)	8_2_0_0	High mannose
P78536	N103	Hex(8)HexNAc(2)	8_2_0_0	High mannose
P78536	N174	Hex(8)HexNAc(2)	8_2_0_0	High mannose
P78536	N498	Hex(3)HexNAc(6)	3_6_0_0	Complex
P78536	N498	Hex(5)HexNAc(4)NeuAc(2)	5_4_0_2	Complex-Sialylated
P78536	N498	Hex(5)HexNAc(4)Fuc(1)NeuAc(1)	5_4_1_1	Complex/Hybrid-Sialofucosylated
P78536	N539	Hex(8)HexNAc(2)	8_2_0_0	High mannose
P78536	N594	Hex(6)HexNAc(5)Fuc(1)NeuAc(3)	6_5_1_3	Complex-Sialofucosylated
P78536	N594	Hex(5)HexNAc(4)Fuc(1)NeuAc(1)	5_4_1_1	Complex/Hybrid-Sialofucosylated
P78536	N594	Hex(6)HexNAc(5)Fuc(3)NeuAc(1)	6_5_3_1	Complex/Hybrid-Sialofucosylated
P78536	N594	Hex(7)HexNAc(2)	7_2_0_0	High mannose
P78536	N594	Hex(8)HexNAc(2)	8_2_0_0	High mannose
P78536	N594	Hex(9)HexNAc(2)	9_2_0_0	High mannose
Q02809	N197	Hex(3)HexNAc(6)Fuc(3)	3_6_3_0	Complex-Fucosylated
Q07954	N3333	Hex(9)HexNAc(2)	9_2_0_0	High mannose
Q07954	N3788	Hex(5)HexNAc(4)Fuc(1)NeuAc(2)	5_4_1_2	Complex-Sialofucosylated
Q07954	N3788	Hex(5)HexNAc(4)Fuc(1)NeuAc(1)	5_4_1_1	Complex/Hybrid-Sialofucosylated
Q07954	N4075	Hex(6)HexNAc(2)	6_2_0_0	High mannose
Q07954	N4075	Hex(8)HexNAc(2)	8_2_0_0	High mannose
Q08380	N125	Hex(6)HexNAc(2)	6_2_0_0	High mannose
Q08380	N125	Hex(7)HexNAc(2)	7_2_0_0	High mannose
Q08380	N125	Hex(8)HexNAc(2)	8_2_0_0	High mannose
Q08380	N125	Hex(9)HexNAc(2)	9_2_0_0	High mannose
Q08380	N398	Hex(10)HexNAc(2)	10_2_0_0	High mannose
Q08380	N398	Hex(8)HexNAc(2)	8_2_0_0	High mannose
Q08380	N398	Hex(9)HexNAc(2)	9_2_0_0	High mannose
Q08380	N551	Hex(5)HexNAc(4)Fuc(1)NeuAc(2)	5_4_1_2	Complex-Sialofucosylated
Q08380	N551	Hex(6)HexNAc(5)Fuc(1)NeuAc(1)	6_5_1_1	Complex/Hybrid-Sialofucosylated
Q08380	N551	Hex(6)HexNAc(5)Fuc(1)NeuAc(2)	6_5_1_2	Complex/Hybrid-Sialofucosylated
Q08380	N551	Hex(10)HexNAc(2)	10_2_0_0	High mannose
Q08380	N551	Hex(10)HexNAc(2)	10_2_0_0	High mannose
Q08380	N551	Hex(7)HexNAc(2)	7_2_0_0	High mannose
Q08380	N551	Hex(8)HexNAc(2)	8_2_0_0	High mannose
Q08380	N551	Hex(9)HexNAc(2)	9_2_0_0	High mannose
Q08380	N580	Hex(9)HexNAc(2)	9_2_0_0	High mannose
Q08380	N69	Hex(8)HexNAc(2)	8_2_0_0	High mannose
Q08380	N69	Hex(9)HexNAc(2)	9_2_0_0	High mannose
Q08722	N111	Hex(6)HexNAc(5)Fuc(1)NeuAc(1)	6_5_1_1	Complex/Hybrid-Sialofucosylated
Q08722	N111	Hex(6)HexNAc(5)Fuc(1)NeuAc(2)	6_5_1_2	Complex/Hybrid-Sialofucosylated
Q08722	N111	Hex(6)HexNAc(5)Fuc(2)NeuAc(1)	6_5_2_1	Complex/Hybrid-Sialofucosylated
Q08722	N111	Hex(6)HexNAc(5)Fuc(3)NeuAc(1)	6_5_3_1	Complex/Hybrid-Sialofucosylated
Q08722	N111	Hex(6)HexNAc(5)NeuAc(2)	6_5_0_2	Complex/Hybrid-Sialylated
Q08722	N73	Hex(7)HexNAc(2)	7_2_0_0	High mannose
Q08722	N73	Hex(8)HexNAc(2)	8_2_0_0	High mannose
Q08722	N73	Hex(6)HexNAc(3)Fuc(1)	6_3_1_0	Hybrid-Fucosylated
Q10589	N65	Hex(8)HexNAc(2)	8_2_0_0	High mannose
Q10589	N92	Hex(6)HexNAc(5)Fuc(1)NeuAc(3)	6_5_1_3	Complex-Sialofucosylated
Q10589	N92	Hex(7)HexNAc(6)Fuc(1)NeuAc(4)	7_6_1_4	Complex-Sialofucosylated
Q10589	N92	Hex(7)HexNAc(6)Fuc(5)NeuAc(2)	7_6_5_2	Complex-Sialofucosylated
Q11201	N323	Hex(7)HexNAc(6)Fuc(2)	7_6_2_0	Complex-Fucosylated
Q11201	N323	Hex(5)HexNAc(4)Fuc(3)NeuAc(2)	5_4_3_2	Complex-Sialofucosylated
Q12797	N12	Hex(4)HexNAc(2)	4_2_0_0	High mannose
Q12797	N706	Hex(6)HexNAc(7)Fuc(1)NeuAc(2)	6_7_1_2	Complex-Sialofucosylated
Q12884	N99	Hex(5)HexNAc(4)Fuc(1)NeuAc(2)	5_4_1_2	Complex-Sialofucosylated
Q12884	N99	Hex(5)HexNAc(4)Fuc(2)NeuAc(1)	5_4_2_1	Complex/Hybrid-Sialofucosylated
Q12907	N183	Hex(3)HexNAc(5)	3_5_0_0	Complex
Q12907	N183	Hex(3)HexNAc(6)	3_6_0_0	Complex
Q12907	N183	Hex(4)HexNAc(5)Fuc(1)	4_5_1_0	Complex/Hybrid-Fucosylated
Q12907	N183	Hex(5)HexNAc(5)Fuc(1)	5_5_1_0	Complex/Hybrid-Fucosylated
Q12907	N183	Hex(5)HexNAc(5)Fuc(2)	5_5_2_0	Complex/Hybrid-Fucosylated
Q12907	N183	Hex(5)HexNAc(5)NeuAc(1)	5_5_0_1	Complex/Hybrid-Sialylated
Q13308	N175	Hex(4)HexNAc(5)Fuc(1)NeuAc(2)	4_5_1_2	Complex-Sialofucosylated
Q13308	N175	Hex(5)HexNAc(4)Fuc(1)NeuAc(2)	5_4_1_2	Complex-Sialofucosylated
Q13308	N567	Hex(5)HexNAc(4)Fuc(3)	5_4_3_0	Complex/Hybrid-Fucosylated
Q13308	N646	Hex(6)HexNAc(2)	6_2_0_0	High mannose
Q13443	N381	Hex(8)HexNAc(2)	8_2_0_0	High mannose
Q13443	N487	Hex(5)HexNAc(4)NeuAc(1)	5_4_0_1	Complex/Hybrid-Sialylated
Q13443	N487	Hex(7)HexNAc(2)	7_2_0_0	High mannose
Q13443	N487	Hex(9)HexNAc(2)	9_2_0_0	High mannose
Q13443	N487	Hex(5)HexNAc(3)NeuAc(1)	5_3_0_1	Hybrid-Sialylated
Q13443	N487	Hex(6)HexNAc(3)NeuAc(1)	6_3_0_1	Hybrid-Sialylated
Q13641	N275	Hex(5)HexNAc(5)Fuc(2)NeuAc(2)	5_5_2_2	Complex-Sialofucosylated
Q13641	N275	Hex(6)HexNAc(5)Fuc(1)NeuAc(3)	6_5_1_3	Complex-Sialofucosylated
Q13641	N275	Hex(6)HexNAc(5)Fuc(1)NeuAc(2)	6_5_1_2	Complex/Hybrid-Sialofucosylated
Q13641	N275	Hex(6)HexNAc(5)Fuc(2)NeuAc(1)	6_5_2_1	Complex/Hybrid-Sialofucosylated
Q13641	N275	Hex(6)HexNAc(5)Fuc(2)NeuAc(2)	6_5_2_2	Complex/Hybrid-Sialofucosylated
Q13641	N81	Hex(6)HexNAc(5)Fuc(1)NeuAc(3)	6_5_1_3	Complex-Sialofucosylated
Q13740	N167	Hex(5)HexNAc(4)Fuc(1)NeuAc(2)	5_4_1_2	Complex-Sialofucosylated
Q13740	N167	Hex(9)HexNAc(8)Fuc(4)NeuAc(6)	9_8_4_6	Complex-Sialofucosylated
Q13740	N167	Hex(5)HexNAc(4)NeuAc(2)	5_4_0_2	Complex-Sialylated
Q13740	N167	Hex(5)HexNAc(5)Fuc(3)	5_5_3_0	Complex/Hybrid-Fucosylated
Q13740	N167	Hex(5)HexNAc(4)Fuc(1)NeuAc(1)	5_4_1_1	Complex/Hybrid-Sialofucosylated
Q13740	N167	Hex(5)HexNAc(4)Fuc(2)NeuAc(1)	5_4_2_1	Complex/Hybrid-Sialofucosylated
Q13740	N167	Hex(5)HexNAc(4)Fuc(3)NeuAc(1)	5_4_3_1	Complex/Hybrid-Sialofucosylated
Q13740	N167	Hex(5)HexNAc(5)Fuc(1)NeuAc(1)	5_5_1_1	Complex/Hybrid-Sialofucosylated
Q13740	N167	Hex(5)HexNAc(3)Fuc(1)	5_3_1_0	Hybrid-Fucosylated
Q13740	N265	Hex(6)HexNAc(5)Fuc(1)NeuAc(3)	6_5_1_3	Complex-Sialofucosylated
Q13740	N265	Hex(7)HexNAc(6)Fuc(1)NeuAc(2)	7_6_1_2	Complex-Sialofucosylated
Q13740	N265	Hex(7)HexNAc(6)Fuc(1)NeuAc(3)	7_6_1_3	Complex-Sialofucosylated
Q13740	N265	Hex(7)HexNAc(6)Fuc(1)NeuAc(4)	7_6_1_4	Complex-Sialofucosylated
Q13740	N361	Hex(4)HexNAc(5)Fuc(1)NeuAc(2)	4_5_1_2	Complex-Sialofucosylated
Q13740	N361	Hex(4)HexNAc(5)Fuc(2)NeuAc(1)	4_5_2_1	Complex-Sialofucosylated
Q13740	N361	Hex(5)HexNAc(4)Fuc(1)NeuAc(2)	5_4_1_2	Complex-Sialofucosylated
Q13740	N361	Hex(5)HexNAc(4)Fuc(2)NeuAc(2)	5_4_2_2	Complex-Sialofucosylated
Q13740	N361	Hex(5)HexNAc(6)Fuc(1)NeuAc(2)	5_6_1_2	Complex-Sialofucosylated
Q13740	N361	Hex(6)HexNAc(5)Fuc(1)NeuAc(3)	6_5_1_3	Complex-Sialofucosylated
Q13740	N361	Hex(7)HexNAc(6)Fuc(1)NeuAc(4)	7_6_1_4	Complex-Sialofucosylated
Q13740	N361	Hex(8)HexNAc(7)NeuAc(1)	8_7_0_1	Complex-Sialylated
Q13740	N361	Hex(5)HexNAc(4)Fuc(2)NeuAc(1)	5_4_2_1	Complex/Hybrid-Sialofucosylated
Q13740	N361	Hex(5)HexNAc(4)Fuc(3)NeuAc(1)	5_4_3_1	Complex/Hybrid-Sialofucosylated
Q13740	N361	Hex(6)HexNAc(5)Fuc(1)NeuAc(2)	6_5_1_2	Complex/Hybrid-Sialofucosylated
Q13740	N361	Hex(6)HexNAc(5)Fuc(2)NeuAc(2)	6_5_2_2	Complex/Hybrid-Sialofucosylated
Q13740	N361	Hex(6)HexNAc(5)Fuc(3)NeuAc(2)	6_5_3_2	Complex/Hybrid-Sialofucosylated
Q13740	N480	Hex(5)HexNAc(4)Fuc(1)NeuAc(2)	5_4_1_2	Complex-Sialofucosylated
Q13740	N480	Hex(6)HexNAc(5)Fuc(1)NeuAc(3)	6_5_1_3	Complex-Sialofucosylated
Q13740	N480	Hex(7)HexNAc(6)Fuc(1)NeuAc(2)	7_6_1_2	Complex-Sialofucosylated
Q13740	N480	Hex(7)HexNAc(6)Fuc(1)NeuAc(3)	7_6_1_3	Complex-Sialofucosylated
Q13740	N480	Hex(7)HexNAc(6)Fuc(3)NeuAc(2)	7_6_3_2	Complex-Sialofucosylated
Q13740	N480	Hex(8)HexNAc(8)Fuc(5)NeuAc(2)	8_8_5_2	Complex-Sialofucosylated
Q13740	N480	Hex(5)HexNAc(4)Fuc(3)	5_4_3_0	Complex/Hybrid-Fucosylated
Q13740	N480	Hex(6)HexNAc(5)Fuc(3)	6_5_3_0	Complex/Hybrid-Fucosylated
Q13740	N480	Hex(5)HexNAc(4)Fuc(1)NeuAc(1)	5_4_1_1	Complex/Hybrid-Sialofucosylated
Q13740	N480	Hex(5)HexNAc(4)Fuc(2)NeuAc(1)	5_4_2_1	Complex/Hybrid-Sialofucosylated
Q13740	N480	Hex(6)HexNAc(5)Fuc(1)NeuAc(1)	6_5_1_1	Complex/Hybrid-Sialofucosylated
Q13740	N480	Hex(6)HexNAc(5)Fuc(1)NeuAc(2)	6_5_1_2	Complex/Hybrid-Sialofucosylated
Q13740	N480	Hex(6)HexNAc(5)Fuc(2)NeuAc(1)	6_5_2_1	Complex/Hybrid-Sialofucosylated
Q13740	N480	Hex(6)HexNAc(5)Fuc(2)NeuAc(2)	6_5_2_2	Complex/Hybrid-Sialofucosylated
Q13740	N480	Hex(6)HexNAc(5)Fuc(3)NeuAc(1)	6_5_3_1	Complex/Hybrid-Sialofucosylated
Q13740	N480	Hex(6)HexNAc(5)NeuAc(2)	6_5_0_2	Complex/Hybrid-Sialylated
Q13740	N480	Hex(8)HexNAc(2)	8_2_0_0	High mannose
Q13740	N480	Hex(9)HexNAc(2)	9_2_0_0	High mannose
Q13740	N480	Hex(7)HexNAc(5)Fuc(2)	7_5_2_0	Hybrid-Fucosylated
Q13740	N480	Hex(7)HexNAc(5)Fuc(2)NeuAc(1)	7_5_2_1	Hybrid-Sialofucosylated
Q13751	N810	Hex(3)HexNAc(4)Fuc(3)	3_4_3_0	Complex-Fucosylated
Q13751	N810	Hex(6)HexNAc(2)	6_2_0_0	High mannose
Q13751	N810	Hex(7)HexNAc(2)	7_2_0_0	High mannose
Q13751	N810	Hex(8)HexNAc(2)	8_2_0_0	High mannose
Q13751	N810	Hex(9)HexNAc(2)	9_2_0_0	High mannose
Q14126	N182	Hex(4)HexNAc(5)Fuc(1)NeuAc(2)	4_5_1_2	Complex-Sialofucosylated
Q14126	N182	Hex(5)HexNAc(4)Fuc(1)NeuAc(2)	5_4_1_2	Complex-Sialofucosylated
Q14126	N182	Hex(4)HexNAc(5)Fuc(2)	4_5_2_0	Complex/Hybrid-Fucosylated
Q14126	N182	Hex(4)HexNAc(5)Fuc(3)	4_5_3_0	Complex/Hybrid-Fucosylated
Q14126	N182	Hex(5)HexNAc(4)Fuc(1)NeuAc(1)	5_4_1_1	Complex/Hybrid-Sialofucosylated
Q16563	N71	Hex(5)HexNAc(6)Fuc(1)NeuAc(1)	5_6_1_1	Complex-Sialofucosylated
Q16563	N71	Hex(10)HexNAc(2)	10_2_0_0	High mannose
Q16563	N71	Hex(5)HexNAc(2)	5_2_0_0	High mannose
Q16563	N71	Hex(6)HexNAc(2)	6_2_0_0	High mannose
Q16563	N71	Hex(7)HexNAc(2)	7_2_0_0	High mannose
Q16563	N71	Hex(5)HexNAc(3)Fuc(1)NeuAc(1)	5_3_1_1	Hybrid-Sialofucosylated
Q16563	N71	Hex(6)HexNAc(3)Fuc(1)NeuAc(1)	6_3_1_1	Hybrid-Sialofucosylated
Q16563	N71	Hex(6)HexNAc(3)NeuAc(1)	6_3_0_1	Hybrid-Sialylated
Q29963	N110	Hex(4)HexNAc(5)Fuc(1)NeuAc(2)	4_5_1_2	Complex-Sialofucosylated
Q29963	N110	Hex(5)HexNAc(4)Fuc(1)NeuAc(2)	5_4_1_2	Complex-Sialofucosylated
Q5JPE7	N218	Hex(7)HexNAc(6)NeuAc(2)	7_6_0_2	Complex-Sialylated
Q5JTV8	N268	Hex(5)HexNAc(4)Fuc(1)NeuAc(2)	5_4_1_2	Complex-Sialofucosylated
Q5JTV8	N399	Hex(8)HexNAc(2)	8_2_0_0	High mannose
Q5VW38	N169	Hex(5)HexNAc(4)Fuc(1)NeuAc(2)	5_4_1_2	Complex-Sialofucosylated
Q5VW38	N169	Hex(5)HexNAc(4)Fuc(1)NeuAc(3)	5_4_1_3	Complex-Sialofucosylated
Q5VW38	N169	Hex(5)HexNAc(4)Fuc(2)NeuAc(2)	5_4_2_2	Complex-Sialofucosylated
Q5VW38	N169	Hex(5)HexNAc(4)NeuAc(3)	5_4_0_3	Complex-Sialylated
Q5VW38	N169	Hex(5)HexNAc(4)Fuc(3)NeuAc(1)	5_4_3_1	Complex/Hybrid-Sialofucosylated
Q5ZPR3	N104	Hex(6)HexNAc(5)Fuc(1)NeuAc(3)	6_5_1_3	Complex-Sialofucosylated
Q5ZPR3	N104	Hex(6)HexNAc(5)NeuAc(3)	6_5_0_3	Complex-Sialylated
Q5ZPR3	N104	Hex(6)HexNAc(5)NeuAc(2)	6_5_0_2	Complex/Hybrid-Sialylated
Q5ZPR3	N215	Hex(6)HexNAc(5)Fuc(1)NeuAc(2)	6_5_1_2	Complex/Hybrid-Sialofucosylated
Q5ZPR3	N322	Hex(4)HexNAc(5)Fuc(2)NeuAc(1)	4_5_2_1	Complex-Sialofucosylated
Q5ZPR3	N322	Hex(5)HexNAc(4)Fuc(1)NeuAc(2)	5_4_1_2	Complex-Sialofucosylated
Q5ZPR3	N322	Hex(5)HexNAc(4)NeuAc(2)	5_4_0_2	Complex-Sialylated
Q5ZPR3	N433	Hex(6)HexNAc(5)Fuc(1)NeuAc(3)	6_5_1_3	Complex-Sialofucosylated
Q5ZPR3	N433	Hex(6)HexNAc(5)Fuc(2)NeuAc(2)	6_5_2_2	Complex/Hybrid-Sialofucosylated
Q5ZPR3	N91	Hex(5)HexNAc(4)Fuc(1)NeuAc(2)	5_4_1_2	Complex-Sialofucosylated
Q6UXH1	N251	Hex(6)HexNAc(2)	6_2_0_0	High mannose
Q6UXH1	N251	Hex(8)HexNAc(2)	8_2_0_0	High mannose
Q6YHK3	N1086	Hex(6)HexNAc(5)Fuc(1)NeuAc(3)	6_5_1_3	Complex-Sialofucosylated
Q6YHK3	N1086	Hex(7)HexNAc(6)NeuAc(4)	7_6_0_4	Complex-Sialylated
Q6YHK3	N1086	Hex(9)HexNAc(2)	9_2_0_0	High mannose
Q6YHK3	N247	Hex(8)HexNAc(2)	8_2_0_0	High mannose
Q6YHK3	N337	Hex(8)HexNAc(2)	8_2_0_0	High mannose
Q6YHK3	N397	Hex(9)HexNAc(2)	9_2_0_0	High mannose
Q6YHK3	N419	Hex(9)HexNAc(2)	9_2_0_0	High mannose
Q6ZRP7	N266	Hex(5)HexNAc(4)Fuc(2)NeuAc(2)	5_4_2_2	Complex-Sialofucosylated
Q86SQ4	N563	Hex(6)HexNAc(5)Fuc(1)NeuAc(3)	6_5_1_3	Complex-Sialofucosylated
Q86SQ4	N563	Hex(6)HexNAc(5)Fuc(3)NeuAc(2)	6_5_3_2	Complex/Hybrid-Sialofucosylated
Q8IV08	N284	Hex(7)HexNAc(6)Fuc(1)NeuAc(1)	7_6_1_1	Complex-Sialofucosylated
Q8IV08	N284	Hex(7)HexNAc(2)	7_2_0_0	High mannose
Q8IV08	N284	Hex(8)HexNAc(2)	8_2_0_0	High mannose
Q8IWA5	N417	Hex(5)HexNAc(4)Fuc(1)NeuAc(2)	5_4_1_2	Complex-Sialofucosylated
Q8IWA5	N417	Hex(5)HexNAc(4)Fuc(2)NeuAc(1)	5_4_2_1	Complex/Hybrid-Sialofucosylated
Q8IWA5	N417	Hex(8)HexNAc(2)	8_2_0_0	High mannose
Q8IZA0	N890	Hex(7)HexNAc(2)	7_2_0_0	High mannose
Q8IZA0	N890	Hex(8)HexNAc(2)	8_2_0_0	High mannose
Q8NBJ4	N109	Hex(3)HexNAc(6)Fuc(2)NeuAc(1)	3_6_2_1	Complex-Sialofucosylated
Q8NBJ4	N109	Hex(4)HexNAc(5)Fuc(1)NeuAc(2)	4_5_1_2	Complex-Sialofucosylated
Q8NBJ4	N109	Hex(4)HexNAc(5)Fuc(3)NeuAc(1)	4_5_3_1	Complex-Sialofucosylated
Q8NBJ4	N109	Hex(5)HexNAc(4)NeuAc(3)	5_4_0_3	Complex-Sialylated
Q8NBJ4	N144	Hex(4)HexNAc(5)Fuc(1)NeuAc(2)	4_5_1_2	Complex-Sialofucosylated
Q8NBJ4	N144	Hex(4)HexNAc(5)Fuc(2)NeuAc(1)	4_5_2_1	Complex-Sialofucosylated
Q8NBJ4	N144	Hex(5)HexNAc(4)Fuc(1)NeuAc(2)	5_4_1_2	Complex-Sialofucosylated
Q8NBJ4	N144	Hex(5)HexNAc(4)Fuc(2)NeuAc(2)	5_4_2_2	Complex-Sialofucosylated
Q8NBJ4	N144	Hex(5)HexNAc(4)Fuc(3)NeuAc(2)	5_4_3_2	Complex-Sialofucosylated
Q8NBJ4	N144	Hex(7)HexNAc(6)NeuAc(1)	7_6_0_1	Complex-Sialylated
Q8TCJ2	N641	Hex(5)HexNAc(4)Fuc(1)NeuAc(2)	5_4_1_2	Complex-Sialofucosylated
Q8TCJ2	N641	Hex(6)HexNAc(5)Fuc(1)NeuAc(3)	6_5_1_3	Complex-Sialofucosylated
Q8TCJ2	N641	Hex(6)HexNAc(6)Fuc(1)NeuAc(2)	6_6_1_2	Complex-Sialofucosylated
Q8TCJ2	N641	Hex(6)HexNAc(6)NeuAc(3)	6_6_0_3	Complex-Sialylated
Q8TCJ2	N641	Hex(9)HexNAc(2)	9_2_0_0	High mannose
Q8TEM1	N1441	Hex(7)HexNAc(6)Fuc(3)NeuAc(4)	7_6_3_4	Complex-Sialofucosylated
Q8TEM1	N1441	Hex(8)HexNAc(2)	8_2_0_0	High mannose
Q8TEM1	N1441	Hex(9)HexNAc(2)	9_2_0_0	High mannose
Q8TEM1	N44	Hex(8)HexNAc(7)Fuc(2)	8_7_2_0	Complex-Fucosylated
Q8TEM1	N44	Hex(9)HexNAc(2)	9_2_0_0	High mannose
Q8TEM1	N484	Hex(6)HexNAc(2)	6_2_0_0	High mannose
Q8WVQ1	N88	Hex(5)HexNAc(4)Fuc(2)NeuAc(2)	5_4_2_2	Complex-Sialofucosylated
Q8WWI5	N135	Hex(6)HexNAc(2)	6_2_0_0	High mannose
Q8WWI5	N135	Hex(7)HexNAc(2)	7_2_0_0	High mannose
Q92485	N343	Hex(7)HexNAc(6)Fuc(1)NeuAc(2)	7_6_1_2	Complex-Sialofucosylated
Q92485	N343	Hex(7)HexNAc(6)Fuc(1)NeuAc(3)	7_6_1_3	Complex-Sialofucosylated
Q92485	N343	Hex(7)HexNAc(6)NeuAc(2)	7_6_0_2	Complex-Sialylated
Q92485	N343	Hex(7)HexNAc(6)NeuAc(3)	7_6_0_3	Complex-Sialylated
Q92485	N343	Hex(7)HexNAc(6)NeuAc(4)	7_6_0_4	Complex-Sialylated
Q92485	N343	Hex(6)HexNAc(5)NeuAc(2)	6_5_0_2	Complex/Hybrid-Sialylated
Q92542	N435	Hex(6)HexNAc(2)	6_2_0_0	High mannose
Q92542	N435	Hex(7)HexNAc(2)	7_2_0_0	High mannose
Q92542	N435	Hex(8)HexNAc(2)	8_2_0_0	High mannose
Q92542	N435	Hex(9)HexNAc(2)	9_2_0_0	High mannose
Q92542	N45	Hex(10)HexNAc(2)	10_2_0_0	High mannose
Q92542	N45	Hex(8)HexNAc(2)	8_2_0_0	High mannose
Q92542	N45	Hex(9)HexNAc(2)	9_2_0_0	High mannose
Q92542	N506	Hex(7)HexNAc(6)Fuc(1)NeuAc(4)	7_6_1_4	Complex-Sialofucosylated
Q92542	N530	Hex(9)HexNAc(2)	9_2_0_0	High mannose
Q92563	N225	Hex(5)HexNAc(4)Fuc(1)NeuAc(2)	5_4_1_2	Complex-Sialofucosylated
Q92563	N225	Hex(8)HexNAc(2)	8_2_0_0	High mannose
Q92563	N225	Hex(9)HexNAc(2)	9_2_0_0	High mannose
Q92626	N1178	Hex(8)HexNAc(2)	8_2_0_0	High mannose
Q92626	N1368	Hex(10)HexNAc(2)	10_2_0_0	High mannose
Q92626	N1368	Hex(8)HexNAc(2)	8_2_0_0	High mannose
Q92626	N1368	Hex(6)HexNAc(3)Fuc(1)NeuAc(1)	6_3_1_1	Hybrid-Sialofucosylated
Q92626	N731	Hex(9)HexNAc(2)	9_2_0_0	High mannose
Q92791	N79	Hex(8)HexNAc(2)	8_2_0_0	High mannose
Q92896	N165	Hex(5)HexNAc(4)Fuc(2)NeuAc(2)	5_4_2_2	Complex-Sialofucosylated
Q92896	N210	Hex(3)HexNAc(6)Fuc(3)	3_6_3_0	Complex-Fucosylated
Q92896	N210	Hex(3)HexNAc(6)Fuc(2)NeuAc(1)	3_6_2_1	Complex-Sialofucosylated
Q92896	N210	Hex(4)HexNAc(5)Fuc(3)NeuAc(1)	4_5_3_1	Complex-Sialofucosylated
Q92896	N210	Hex(5)HexNAc(4)Fuc(3)NeuAc(2)	5_4_3_2	Complex-Sialofucosylated
Q96HE7	N280	Hex(9)HexNAc(2)	9_2_0_0	High mannose
Q96J42	N165	Hex(8)HexNAc(2)	8_2_0_0	High mannose
Q96J42	N293	Hex(8)HexNAc(2)	8_2_0_0	High mannose
Q96J84	N297	Hex(6)HexNAc(5)Fuc(1)NeuAc(2)	6_5_1_2	Complex/Hybrid-Sialofucosylated
Q96JJ7	N258	Hex(8)HexNAc(2)	8_2_0_0	High mannose
Q96KA5	N229	Hex(8)HexNAc(2)	8_2_0_0	High mannose
Q96KA5	N91	Hex(8)HexNAc(2)	8_2_0_0	High mannose
Q99523	N162	Hex(5)HexNAc(4)Fuc(1)NeuAc(2)	5_4_1_2	Complex-Sialofucosylated
Q99523	N406	Hex(10)HexNAc(2)	10_2_0_0	High mannose
Q99523	N406	Hex(9)HexNAc(2)	9_2_0_0	High mannose
Q99523	N98	Hex(5)HexNAc(4)Fuc(1)NeuAc(2)	5_4_1_2	Complex-Sialofucosylated
Q99571	N75	Hex(5)HexNAc(4)Fuc(1)NeuAc(2)	5_4_1_2	Complex-Sialofucosylated
Q99715	N1763	Hex(9)HexNAc(2)	9_2_0_0	High mannose
Q99729	N60	Hex(4)HexNAc(6)	4_6_0_0	Complex
Q99729	N60	Hex(5)HexNAc(7)Fuc(5)	5_7_5_0	Complex-Fucosylated
Q99729	N60	Hex(6)HexNAc(6)Fuc(4)	6_6_4_0	Complex-Fucosylated
Q99729	N60	Hex(7)HexNAc(6)Fuc(3)	7_6_3_0	Complex-Fucosylated
Q99729	N60	Hex(7)HexNAc(7)Fuc(1)	7_7_1_0	Complex-Fucosylated
Q99729	N60	Hex(6)HexNAc(6)Fuc(2)NeuAc(1)	6_6_2_1	Complex-Sialofucosylated
Q99729	N60	Hex(6)HexNAc(6)NeuAc(2)	6_6_0_2	Complex-Sialylated
Q99729	N60	Hex(7)HexNAc(4)Fuc(3)NeuAc(1)	7_4_3_1	Hybrid-Sialofucosylated
Q9BVK6	N125	Hex(5)HexNAc(4)Fuc(1)NeuAc(2)	5_4_1_2	Complex-Sialofucosylated
Q9BVK6	N125	Hex(5)HexNAc(4)Fuc(2)NeuAc(1)	5_4_2_1	Complex/Hybrid-Sialofucosylated
Q9C0H2	N351	Hex(6)HexNAc(5)Fuc(3)NeuAc(2)	6_5_3_2	Complex/Hybrid-Sialofucosylated
Q9H0X4	N389	Hex(6)HexNAc(5)NeuAc(3)	6_5_0_3	Complex-Sialylated
Q9H0X4	N389	Hex(8)HexNAc(2)	8_2_0_0	High mannose
Q9H330	N551	Hex(8)HexNAc(2)	8_2_0_0	High mannose
Q9H5V8	N122	Hex(3)HexNAc(6)	3_6_0_0	Complex
Q9H5V8	N122	Hex(8)HexNAc(2)	8_2_0_0	High mannose
Q9H5V8	N180	Hex(6)HexNAc(5)NeuAc(2)	6_5_0_2	Complex/Hybrid-Sialylated
Q9H5V8	N270	Hex(6)HexNAc(5)Fuc(1)NeuAc(3)	6_5_1_3	Complex-Sialofucosylated
Q9H5V8	N310	Hex(8)HexNAc(2)	8_2_0_0	High mannose
Q9H5V8	N339	Hex(5)HexNAc(4)Fuc(2)NeuAc(1)	5_4_2_1	Complex/Hybrid-Sialofucosylated
Q9H5V8	N339	Hex(9)HexNAc(2)	9_2_0_0	High mannose
Q9H5V8	N386	Hex(8)HexNAc(7)	8_7_0_0	Complex
Q9H5V8	N386	Hex(5)HexNAc(4)Fuc(1)NeuAc(2)	5_4_1_2	Complex-Sialofucosylated
Q9H5V8	N386	Hex(6)HexNAc(5)Fuc(1)NeuAc(3)	6_5_1_3	Complex-Sialofucosylated
Q9H5V8	N386	Hex(5)HexNAc(4)NeuAc(2)	5_4_0_2	Complex-Sialylated
Q9H5V8	N386	Hex(6)HexNAc(5)Fuc(3)	6_5_3_0	Complex/Hybrid-Fucosylated
Q9H5V8	N386	Hex(5)HexNAc(4)Fuc(1)NeuAc(1)	5_4_1_1	Complex/Hybrid-Sialofucosylated
Q9H5V8	N386	Hex(5)HexNAc(4)Fuc(2)NeuAc(1)	5_4_2_1	Complex/Hybrid-Sialofucosylated
Q9H5V8	N386	Hex(5)HexNAc(4)Fuc(3)NeuAc(1)	5_4_3_1	Complex/Hybrid-Sialofucosylated
Q9H5V8	N477	Hex(5)HexNAc(4)NeuAc(2)	5_4_0_2	Complex-Sialylated
Q9H5V8	N477	Hex(5)HexNAc(4)Fuc(2)NeuAc(1)	5_4_2_1	Complex/Hybrid-Sialofucosylated
Q9H5V8	N512	Hex(8)HexNAc(2)	8_2_0_0	High mannose
Q9H5V8	N639	Hex(8)HexNAc(2)	8_2_0_0	High mannose
Q9HAV5	N74	Hex(5)HexNAc(4)Fuc(1)NeuAc(2)	5_4_1_2	Complex-Sialofucosylated
Q9HAV5	N74	Hex(5)HexNAc(4)Fuc(2)NeuAc(1)	5_4_2_1	Complex/Hybrid-Sialofucosylated
Q9HAV5	N74	Hex(6)HexNAc(5)Fuc(1)NeuAc(1)	6_5_1_1	Complex/Hybrid-Sialofucosylated
Q9HD45	N174	Hex(6)HexNAc(5)Fuc(4)	6_5_4_0	Complex-Fucosylated
Q9HD45	N174	Hex(5)HexNAc(4)Fuc(1)NeuAc(2)	5_4_1_2	Complex-Sialofucosylated
Q9HD45	N174	Hex(5)HexNAc(4)NeuAc(2)	5_4_0_2	Complex-Sialylated
Q9HD45	N174	Hex(5)HexNAc(4)Fuc(3)	5_4_3_0	Complex/Hybrid-Fucosylated
Q9HDC9	N160	Hex(3)HexNAc(3)Fuc(1)	3_3_1_0	Complex-Fucosylated
Q9HDC9	N160	Hex(3)HexNAc(4)Fuc(1)	3_4_1_0	Complex-Fucosylated
Q9HDC9	N160	Hex(4)HexNAc(3)Fuc(2)	4_3_2_0	Complex/Hybrid-Fucosylated
Q9HDC9	N160	Hex(6)HexNAc(2)	6_2_0_0	High mannose
Q9HDC9	N160	Hex(7)HexNAc(2)	7_2_0_0	High mannose
Q9HDC9	N160	Hex(8)HexNAc(2)	8_2_0_0	High mannose
Q9NS15	N349	Hex(9)HexNAc(2)	9_2_0_0	High mannose
Q9NS15	N349	Hex(5)HexNAc(3)Fuc(1)NeuAc(1)	5_3_1_1	Hybrid-Sialofucosylated
Q9NX62	N259	Hex(3)HexNAc(6)Fuc(2)NeuAc(1)	3_6_2_1	Complex-Sialofucosylated
Q9NX62	N259	Hex(4)HexNAc(5)Fuc(1)NeuAc(2)	4_5_1_2	Complex-Sialofucosylated
Q9NX62	N259	Hex(4)HexNAc(5)Fuc(2)NeuAc(1)	4_5_2_1	Complex-Sialofucosylated
Q9NX62	N259	Hex(4)HexNAc(5)Fuc(3)NeuAc(1)	4_5_3_1	Complex-Sialofucosylated
Q9NX62	N259	Hex(5)HexNAc(4)Fuc(2)NeuAc(2)	5_4_2_2	Complex-Sialofucosylated
Q9NX62	N259	Hex(5)HexNAc(4)Fuc(3)NeuAc(2)	5_4_3_2	Complex-Sialofucosylated
Q9NX62	N259	Hex(8)HexNAc(7)Fuc(1)NeuAc(2)	8_7_1_2	Complex-Sialofucosylated
Q9NX62	N259	Hex(5)HexNAc(5)Fuc(3)NeuAc(1)	5_5_3_1	Complex/Hybrid-Sialofucosylated
Q9P0T7	N38	Hex(6)HexNAc(2)	6_2_0_0	High mannose
Q9P2B2	N286	Hex(4)HexNAc(5)Fuc(1)NeuAc(2)	4_5_1_2	Complex-Sialofucosylated
Q9P2B2	N286	Hex(5)HexNAc(4)Fuc(1)NeuAc(2)	5_4_1_2	Complex-Sialofucosylated
Q9P2B2	N286	Hex(6)HexNAc(5)Fuc(1)NeuAc(3)	6_5_1_3	Complex-Sialofucosylated
Q9P2B2	N286	Hex(6)HexNAc(5)Fuc(1)NeuAc(2)	6_5_1_2	Complex/Hybrid-Sialofucosylated
Q9P2B2	N286	Hex(6)HexNAc(5)Fuc(3)NeuAc(1)	6_5_3_1	Complex/Hybrid-Sialofucosylated
Q9P2B2	N600	Hex(7)HexNAc(6)Fuc(1)NeuAc(4)	7_6_1_4	Complex-Sialofucosylated
Q9UBG0	N69	Hex(5)HexNAc(4)Fuc(1)NeuAc(2)	5_4_1_2	Complex-Sialofucosylated
Q9UBG0	N69	Hex(5)HexNAc(4)Fuc(1)NeuAc(1)	5_4_1_1	Complex/Hybrid-Sialofucosylated
Q9UBG0	N69	Hex(5)HexNAc(4)Fuc(3)NeuAc(1)	5_4_3_1	Complex/Hybrid-Sialofucosylated
Q9UBG0	N69	Hex(9)HexNAc(2)	9_2_0_0	High mannose
Q9UBV2	N180	Hex(6)HexNAc(5)NeuAc(2)	6_5_0_2	Complexomplex/Hybrid-Sialylated
Q9UBV2	N270	Hex(7)HexNAc(6)Fuc(1)NeuAc(2)	7_6_1_2	Complex-Sialofucosylated
Q9UBV2	N270	Hex(7)HexNAc(6)Fuc(1)NeuAc(3)	7_6_1_3	Complex-Sialofucosylated
Q9UBV2	N272	Hex(3)HexNAc(7)	3_7_0_0	Complex
Q9UH99	N636	Hex(8)HexNAc(2)	8_2_0_0	High mannose
Q9UH99	N69	Hex(6)HexNAc(5)Fuc(1)NeuAc(3)	6_5_1_3	Complex-Sialofucosylated
Q9UHG3	N353	Hex(8)HexNAc(2)	8_2_0_0	High mannose
Q9UHN6	N914	Hex(9)HexNAc(2)	9_2_0_0	High mannose
Q9UHX3	N111	Hex(5)HexNAc(4)Fuc(1)NeuAc(2)	5_4_1_2	Complex-Sialofucosylated
Q9UIG8	N153	Hex(10)HexNAc(2)	10_2_0_0	High mannose
Q9UIQ6	N834	Hex(5)HexNAc(4)Fuc(1)NeuAc(2)	5_4_1_2	Complex-Sialofucosylated
Q9UIQ6	N834	Hex(6)HexNAc(5)Fuc(1)NeuAc(3)	6_5_1_3	Complex-Sialofucosylated
Q9UIQ6	N834	Hex(6)HexNAc(5)Fuc(1)NeuAc(2)	6_5_1_2	Complex/Hybrid-Sialofucosylated
Q9UIQ6	N834	Hex(6)HexNAc(5)Fuc(3)NeuAc(1)	6_5_3_1	Complex/Hybrid-Sialofucosylated
Q9UIQ6	N850	Hex(6)HexNAc(5)Fuc(1)NeuAc(3)	6_5_1_3	Complex-Sialofucosylated
Q9UIQ6	N850	Hex(6)HexNAc(5)Fuc(1)NeuAc(2)	6_5_1_2	Complex/Hybrid-Sialofucosylated
Q9UJJ9	N88	Hex(5)HexNAc(7)Fuc(5)NeuAc(2)	5_7_5_2	Complex-Sialofucosylated
Q9UK23	N366	Hex(6)HexNAc(5)Fuc(1)NeuAc(3)	6_5_1_3	Complex-Sialofucosylated
Q9UMF0	N214	Hex(9)HexNAc(2)	9_2_0_0	High mannose
Q9Y337	N173	Hex(10)HexNAc(2)	10_2_0_0	High mannose
Q9Y337	N173	Hex(9)HexNAc(2)	9_2_0_0	High mannose
Q9Y4K0	N288	Hex(8)HexNAc(2)	8_2_0_0	High mannose
Q9Y4K0	N288	Hex(9)HexNAc(2)	9_2_0_0	High mannose
Q9Y4L1	N212	Hex(7)HexNAc(6)Fuc(1)NeuAc(4)	7_6_1_4	Complex-Sialofucosylated
Q9Y4L1	N234	Hex(7)HexNAc(6)Fuc(1)NeuAc(2)	7_6_1_2	Complex-Sialofucosylated
Q9Y4L1	N869	Hex(8)HexNAc(2)	8_2_0_0	High mannose
Q9Y4L1	N869	Hex(9)HexNAc(2)	9_2_0_0	High mannose
Q9Y5Y6	N109	Hex(5)HexNAc(4)Fuc(1)NeuAc(2)	5_4_1_2	Complex-Sialofucosylated
Q9Y5Y6	N109	Hex(5)HexNAc(4)Fuc(2)NeuAc(1)	5_4_2_1	Complex/Hybrid-Sialofucosylated
Q9Y5Y6	N772	Hex(6)HexNAc(2)	6_2_0_0	High mannose
Q9Y5Y6	N772	Hex(7)HexNAc(2)	7_2_0_0	High mannose
Q9Y5Y6	N772	Hex(9)HexNAc(2)	9_2_0_0	High mannose
Q9Y624	N185	Hex(6)HexNAc(7)	6_7_0_0	Complex
Q9Y624	N185	Hex(7)HexNAc(6)	7_6_0_0	Complex
Q9Y624	N185	Hex(5)HexNAc(5)Fuc(4)	5_5_4_0	Complex-Fucosylated
Q9Y624	N185	Hex(4)HexNAc(5)Fuc(3)NeuAc(1)	4_5_3_1	Complex-Sialofucosylated
Q9Y624	N185	Hex(5)HexNAc(4)Fuc(1)NeuAc(2)	5_4_1_2	Complex-Sialofucosylated
Q9Y624	N185	Hex(5)HexNAc(4)NeuAc(2)	5_4_0_2	Complex-Sialylated
Q9Y624	N185	Hex(6)HexNAc(5)	6_5_0_0	Complex/Hybrid
Q9Y624	N185	Hex(4)HexNAc(4)Fuc(3)	4_4_3_0	Complex/Hybrid-Fucosylated
Q9Y624	N185	Hex(5)HexNAc(4)Fuc(3)	5_4_3_0	Complex/Hybrid-Fucosylated
Q9Y624	N185	Hex(5)HexNAc(4)Fuc(2)NeuAc(1)	5_4_2_1	Complex/Hybrid-Sialofucosylated
Q9Y624	N185	Hex(5)HexNAc(4)Fuc(3)NeuAc(1)	5_4_3_1	Complex/Hybrid-Sialofucosylated
Q9Y624	N185	Hex(6)HexNAc(5)Fuc(3)NeuAc(1)	6_5_3_1	Complex/Hybrid-Sialofucosylated
Q9Y624	N185	Hex(7)HexNAc(2)	7_2_0_0	High mannose
Q9Y624	N185	Hex(6)HexNAc(3)Fuc(2)	6_3_2_0	Hybrid-Fucosylated
Q9Y624	N185	Hex(6)HexNAc(4)Fuc(3)	6_4_3_0	Hybrid-Fucosylated
Q9Y624	N185	Hex(5)HexNAc(3)Fuc(1)NeuAc(1)	5_3_1_1	Hybrid-Sialofucosylated
Q9Y624	N185	Hex(6)HexNAc(3)Fuc(1)NeuAc(1)	6_3_1_1	Hybrid-Sialofucosylated
Q9Y624	N185	Hex(6)HexNAc(4)Fuc(2)NeuAc(1)	6_4_2_1	Hybrid-Sialofucosylated
Q9Y624	N185	Hex(6)HexNAc(3)NeuAc(1)	6_3_0_1	Hybrid-Sialylated
Q9Y624	N185	Hex(6)HexNAc(4)NeuAc(2)	6_4_0_2	Hybrid-Sialylated
Q9Y639	N171	Hex(6)HexNAc(5)Fuc(1)NeuAc(2)	6_5_1_2	Complex/Hybrid-Sialofucosylated
Q9Y639	N171	Hex(8)HexNAc(2)	8_2_0_0	High mannose
Q9Y639	N229	Hex(8)HexNAc(2)	8_2_0_0	High mannose
Q9Y639	N229	Hex(9)HexNAc(2)	9_2_0_0	High mannose
