# Supplementary material for: Determination of the glycoprotein specificity of lectins on cell membranes through oxidative proteomics
Source: Chem Sci. 2020 Aug 17;11(35):9501–12. doi: 10.1039/d0sc04199h (PMC8162070; doi:10.1039/d0sc04199h)
Supplement: SC-011-D0SC04199H-s005 [file SC-011-D0SC04199H-s005.xlsx]

## Sheet: Sheet1
Control				α(2,3)sialidase treatment
Protein ID	Glycosites	Glycoform		Protein ID	Glycosites	Glycoform
O00592	360	Hex(5)HexNAc(4)Fuc(1)NeuAc(1)		O00592	360	Hex(5)HexNAc(4)Fuc(1)NeuAc(1)
O14672	278	Hex(9)HexNAc(2)		O14672	278	Hex(5)HexNAc(4)NeuAc(1)
O14672	439	Hex(7)HexNAc(2)		O14672	278	Hex(9)HexNAc(2)
O14672	439	Hex(8)HexNAc(2)		O14672	439	Hex(8)HexNAc(2)
O14672	439	Hex(9)HexNAc(2)		O14672	551	Hex(3)HexNAc(6)
O14672	551	Hex(5)HexNAc(4)Fuc(1)NeuAc(1)		O14672	551	Hex(5)HexNAc(4)Fuc(1)NeuAc(1)
O14672	551	Hex(5)HexNAc(4)Fuc(1)NeuAc(2)		O15031	127	Hex(5)HexNAc(4)Fuc(1)NeuAc(2)
O14672	551	Hex(5)HexNAc(4)NeuAc(2)		O15031	1002	Hex(8)HexNAc(2)
O15031	528	Hex(5)HexNAc(4)NeuAc(2)		O15031	1002	Hex(9)HexNAc(2)
O15031	528	Hex(9)HexNAc(2)		O15031	1049	Hex(5)HexNAc(4)Fuc(1)NeuAc(1)
O15031	759	Hex(7)HexNAc(2)		O15230	3287	Hex(8)HexNAc(2)
O15031	1002	Hex(8)HexNAc(2)		O60635	141	Hex(7)HexNAc(2)
O15031	1049	Hex(5)HexNAc(4)Fuc(1)NeuAc(1)		O75477	106	Hex(8)HexNAc(2)
O15230	1330	Hex(9)HexNAc(2)		O75477	106	Hex(9)HexNAc(2)
O60635	141	Hex(7)HexNAc(2)		O75718	87	Hex(8)HexNAc(2)
O75477	106	Hex(8)HexNAc(2)		O75976	1070	Hex(5)HexNAc(4)Fuc(1)
O75477	106	Hex(9)HexNAc(2)		O75976	1070	Hex(5)HexNAc(4)Fuc(1)NeuAc(1)
O75718	87	Hex(8)HexNAc(2)		O75976	1070	Hex(5)HexNAc(4)Fuc(2)NeuAc(1)
O75976	522	Hex(5)HexNAc(4)Fuc(1)NeuAc(2)		O95302	174	Hex(8)HexNAc(2)
O75976	1070	Hex(5)HexNAc(4)Fuc(1)		P00533	352	Hex(8)HexNAc(2)
O75976	1070	Hex(5)HexNAc(4)Fuc(1)NeuAc(1)		P00533	361	Hex(8)HexNAc(2)
O75976	1070	Hex(5)HexNAc(4)Fuc(2)NeuAc(1)		P00533	603	Hex(5)HexNAc(4)Fuc(1)NeuAc(1)
O75976	1070	Hex(9)HexNAc(2)		P01024	85	Hex(9)HexNAc(2)
O95302	174	Hex(8)HexNAc(2)		P02786	251	Hex(6)HexNAc(5)Fuc(1)NeuAc(2)
O95302	286	Hex(9)HexNAc(2)		P02786	251	Hex(6)HexNAc(5)Fuc(1)NeuAc(3)
P00533	352	Hex(7)HexNAc(2)		P02786	727	Hex(8)HexNAc(2)
P00533	352	Hex(8)HexNAc(2)		P02786	727	Hex(9)HexNAc(2)
P00533	361	Hex(7)HexNAc(2)		P03989	110	Hex(5)HexNAc(5)Fuc(2)
P00533	361	Hex(8)HexNAc(2)		P03989	110	Hex(5)HexNAc(5)Fuc(3)
P01024	85	Hex(8)HexNAc(2)		P04233	130	Hex(6)HexNAc(2)
P01024	85	Hex(9)HexNAc(2)		P04233	130	Hex(8)HexNAc(2)
P02786	251	Hex(5)HexNAc(4)Fuc(1)NeuAc(2)		P04233	130	Hex(9)HexNAc(2)
P02786	251	Hex(6)HexNAc(5)Fuc(1)NeuAc(2)		P05187	271	Hex(5)HexNAc(4)Fuc(1)NeuAc(1)
P02786	251	Hex(6)HexNAc(5)Fuc(1)NeuAc(3)		P05187	271	Hex(5)HexNAc(4)NeuAc(1)
P02786	727	Hex(5)HexNAc(3)NeuAc(1)		P05187	271	Hex(5)HexNAc(4)NeuAc(2)
P02786	727	Hex(9)HexNAc(2)		P05556	50	Hex(6)HexNAc(5)Fuc(1)NeuAc(1)
P03989	110	Hex(5)HexNAc(4)Fuc(1)NeuAc(2)		P05556	50	Hex(6)HexNAc(5)Fuc(3)
P04233	130	Hex(8)HexNAc(2)		P05556	212	Hex(4)HexNAc(6)
P04233	130	Hex(9)HexNAc(2)		P05556	212	Hex(5)HexNAc(4)Fuc(1)
P05026	193	Hex(7)HexNAc(6)Fuc(1)NeuAc(2)		P05556	212	Hex(5)HexNAc(4)Fuc(1)NeuAc(1)
P05187	144	Hex(5)HexNAc(4)Fuc(1)NeuAc(1)		P05556	212	Hex(5)HexNAc(4)Fuc(1)NeuAc(2)
P05187	144	Hex(5)HexNAc(4)Fuc(1)NeuAc(2)		P05556	212	Hex(6)HexNAc(5)Fuc(1)NeuAc(1)
P05187	271	Hex(5)HexNAc(4)Fuc(1)NeuAc(1)		P05556	212	Hex(6)HexNAc(5)Fuc(1)NeuAc(2)
P05187	271	Hex(5)HexNAc(4)NeuAc(1)		P05556	212	Hex(6)HexNAc(5)Fuc(1)NeuAc(3)
P05556	212	Hex(5)HexNAc(4)Fuc(1)NeuAc(2)		P05556	269	Hex(5)HexNAc(4)NeuAc(1)
P05556	212	Hex(7)HexNAc(6)Fuc(1)NeuAc(1)		P05556	520	Hex(7)HexNAc(6)Fuc(1)NeuAc(1)
P05556	212	Hex(7)HexNAc(6)Fuc(1)NeuAc(2)		P05556	520	Hex(7)HexNAc(6)Fuc(1)NeuAc(4)
P05556	520	Hex(3)HexNAc(6)		P06756	74	Hex(8)HexNAc(2)
P05556	520	Hex(4)HexNAc(6)		P06756	615	Hex(8)HexNAc(2)
P05556	520	Hex(7)HexNAc(6)Fuc(1)NeuAc(2)		P08582	515	Hex(5)HexNAc(4)Fuc(1)NeuAc(1)
P05556	520	Hex(7)HexNAc(6)Fuc(1)NeuAc(3)		P08582	515	Hex(5)HexNAc(4)Fuc(1)NeuAc(2)
P05556	520	Hex(7)HexNAc(6)Fuc(1)NeuAc(4)		P09758	120	Hex(4)HexNAc(4)Fuc(1)
P05556	520	Hex(7)HexNAc(6)Fuc(3)NeuAc(2)		P09758	120	Hex(4)HexNAc(4)NeuAc(1)
P05556	520	Hex(7)HexNAc(6)Fuc(3)NeuAc(3)		P09758	120	Hex(4)HexNAc(6)Fuc(1)
P05556	669	Hex(3)HexNAc(6)		P09758	120	Hex(6)HexNAc(2)
P05556	669	Hex(5)HexNAc(4)Fuc(1)NeuAc(1)		P09758	120	Hex(6)HexNAc(2)Fuc(1)
P06756	74	Hex(5)HexNAc(3)Fuc(1)		P09758	168	Hex(6)HexNAc(5)Fuc(1)NeuAc(2)
P06756	74	Hex(5)HexNAc(3)Fuc(1)NeuAc(1)		P09758	168	Hex(6)HexNAc(5)Fuc(1)NeuAc(3)
P06756	74	Hex(5)HexNAc(4)Fuc(1)		P09758	208	Hex(5)HexNAc(4)Fuc(1)NeuAc(1)
P06756	74	Hex(5)HexNAc(4)Fuc(1)NeuAc(1)		P09758	208	Hex(5)HexNAc(4)Fuc(1)NeuAc(2)
P06756	74	Hex(6)HexNAc(2)		P10314	110	Hex(10)HexNAc(2)
P06756	74	Hex(7)HexNAc(2)		P10314	110	Hex(3)HexNAc(6)Fuc(1)
P06756	74	Hex(8)HexNAc(2)		P10314	110	Hex(3)HexNAc(6)Fuc(2)
P06756	554	Hex(6)HexNAc(5)Fuc(1)NeuAc(2)		P10314	110	Hex(4)HexNAc(5)Fuc(2)
P06756	615	Hex(8)HexNAc(2)		P10314	110	Hex(5)HexNAc(4)Fuc(1)NeuAc(2)
P06756	615	Hex(9)HexNAc(2)		P10314	110	Hex(5)HexNAc(5)Fuc(1)NeuAc(1)
P06756	874	Hex(3)HexNAc(6)		P10314	110	Hex(5)HexNAc(6)
P06756	874	Hex(8)HexNAc(2)		P10314	110	Hex(9)HexNAc(2)
P08582	38	Hex(6)HexNAc(5)Fuc(1)NeuAc(3)		P11279	62	Hex(6)HexNAc(5)Fuc(4)NeuAc(1)
P08582	135	Hex(8)HexNAc(2)		P11279	62	Hex(7)HexNAc(6)Fuc(1)
P08582	515	Hex(5)HexNAc(4)Fuc(1)NeuAc(2)		P11279	62	Hex(7)HexNAc(6)Fuc(1)NeuAc(1)
P09758	120	Hex(3)HexNAc(6)		P11279	84	Hex(5)HexNAc(4)Fuc(1)
P09758	120	Hex(4)HexNAc(3)NeuAc(1)		P11279	84	Hex(5)HexNAc(4)Fuc(1)NeuAc(1)
P09758	120	Hex(4)HexNAc(4)Fuc(1)		P11279	84	Hex(5)HexNAc(4)Fuc(1)NeuAc(2)
P09758	120	Hex(4)HexNAc(4)NeuAc(1)		P11279	84	Hex(6)HexNAc(5)Fuc(1)
P09758	120	Hex(4)HexNAc(6)Fuc(1)		P11279	84	Hex(6)HexNAc(5)Fuc(1)NeuAc(1)
P09758	120	Hex(5)HexNAc(2)Fuc(1)		P11279	84	Hex(6)HexNAc(5)Fuc(1)NeuAc(2)
P09758	120	Hex(5)HexNAc(3)Fuc(1)NeuAc(1)		P11279	84	Hex(6)HexNAc(5)Fuc(1)NeuAc(3)
P09758	120	Hex(5)HexNAc(5)Fuc(3)		P11279	84	Hex(6)HexNAc(5)Fuc(3)
P09758	120	Hex(6)HexNAc(2)		P11279	84	Hex(6)HexNAc(5)Fuc(3)NeuAc(1)
P09758	120	Hex(6)HexNAc(2)Fuc(1)		P11279	84	Hex(6)HexNAc(5)Fuc(3)NeuAc(2)
P09758	120	Hex(7)HexNAc(2)		P11279	84	Hex(6)HexNAc(5)Fuc(4)NeuAc(2)
P09758	120	Hex(7)HexNAc(2)Fuc(1)		P11279	84	Hex(7)HexNAc(6)Fuc(1)
P09758	120	Hex(8)HexNAc(2)		P11279	84	Hex(7)HexNAc(6)Fuc(1)NeuAc(1)
P09758	120	Hex(9)HexNAc(2)		P11279	84	Hex(7)HexNAc(6)Fuc(1)NeuAc(2)
P09758	168	Hex(6)HexNAc(5)Fuc(1)NeuAc(2)		P11279	84	Hex(7)HexNAc(6)Fuc(1)NeuAc(3)
P09758	168	Hex(6)HexNAc(5)Fuc(1)NeuAc(3)		P11279	84	Hex(7)HexNAc(6)Fuc(1)NeuAc(4)
P09758	168	Hex(6)HexNAc(5)Fuc(2)NeuAc(2)		P11279	84	Hex(7)HexNAc(6)Fuc(2)NeuAc(1)
P09758	168	Hex(6)HexNAc(5)Fuc(3)NeuAc(1)		P11279	84	Hex(7)HexNAc(6)Fuc(3)
P09758	168	Hex(6)HexNAc(5)NeuAc(3)		P11279	84	Hex(7)HexNAc(6)Fuc(3)NeuAc(2)
P09758	208	Hex(5)HexNAc(4)Fuc(1)NeuAc(1)		P11279	84	Hex(7)HexNAc(6)NeuAc(2)
P09758	208	Hex(5)HexNAc(4)Fuc(1)NeuAc(2)		P11279	84	Hex(7)HexNAc(6)NeuAc(4)
P10314	110	Hex(10)HexNAc(2)		P11279	103	Hex(7)HexNAc(2)
P10314	110	Hex(3)HexNAc(6)Fuc(1)		P11279	107	Hex(6)HexNAc(5)Fuc(3)NeuAc(3)
P10314	110	Hex(3)HexNAc(6)Fuc(2)		P11279	107	Hex(7)HexNAc(6)Fuc(1)NeuAc(1)
P10314	110	Hex(4)HexNAc(5)Fuc(1)		P11279	107	Hex(7)HexNAc(6)Fuc(3)NeuAc(1)
P10314	110	Hex(4)HexNAc(5)Fuc(2)		P11279	249	Hex(6)HexNAc(5)Fuc(2)NeuAc(1)
P10314	110	Hex(5)HexNAc(4)Fuc(1)NeuAc(1)		P11279	261	Hex(6)HexNAc(2)
P10314	110	Hex(5)HexNAc(4)Fuc(1)NeuAc(2)		P11279	261	Hex(7)HexNAc(2)
P10314	110	Hex(5)HexNAc(4)Fuc(2)NeuAc(1)		P11279	261	Hex(7)HexNAc(6)Fuc(1)NeuAc(1)
P10314	110	Hex(5)HexNAc(5)Fuc(3)		P11279	322	Hex(8)HexNAc(2)
P10314	110	Hex(6)HexNAc(5)NeuAc(1)		P11279	322	Hex(9)HexNAc(2)
P10314	110	Hex(8)HexNAc(2)		P11717	400	Hex(8)HexNAc(2)
P10314	110	Hex(9)HexNAc(2)		P11717	543	Hex(6)HexNAc(5)Fuc(3)NeuAc(1)
P11279	62	Hex(7)HexNAc(6)Fuc(1)NeuAc(1)		P11717	581	Hex(7)HexNAc(2)
P11279	62	Hex(7)HexNAc(6)Fuc(1)NeuAc(2)		P11717	581	Hex(8)HexNAc(2)
P11279	84	Hex(4)HexNAc(3)Fuc(1)NeuAc(1)		P11717	747	Hex(6)HexNAc(5)Fuc(1)NeuAc(1)
P11279	84	Hex(5)HexNAc(4)Fuc(1)NeuAc(1)		P11717	871	Hex(5)HexNAc(4)Fuc(1)NeuAc(1)
P11279	84	Hex(5)HexNAc(4)Fuc(1)NeuAc(2)		P11717	871	Hex(5)HexNAc(4)Fuc(1)NeuAc(2)
P11279	84	Hex(5)HexNAc(4)Fuc(3)NeuAc(1)		P11717	1312	Hex(8)HexNAc(2)
P11279	84	Hex(6)HexNAc(5)Fuc(1)NeuAc(2)		P11717	1656	Hex(5)HexNAc(4)Fuc(1)NeuAc(2)
P11279	84	Hex(6)HexNAc(5)Fuc(1)NeuAc(3)		P11717	2136	Hex(5)HexNAc(4)Fuc(1)NeuAc(1)
P11279	84	Hex(6)HexNAc(5)Fuc(3)NeuAc(2)		P13473	49	Hex(6)HexNAc(5)NeuAc(2)
P11279	84	Hex(6)HexNAc(5)Fuc(4)NeuAc(1)		P13473	257	Hex(5)HexNAc(4)Fuc(1)
P11279	84	Hex(6)HexNAc(6)Fuc(1)NeuAc(2)		P13473	257	Hex(6)HexNAc(5)Fuc(1)
P11279	84	Hex(7)HexNAc(6)Fuc(1)NeuAc(1)		P13473	257	Hex(6)HexNAc(5)Fuc(1)NeuAc(1)
P11279	84	Hex(7)HexNAc(6)Fuc(1)NeuAc(2)		P13473	257	Hex(6)HexNAc(5)Fuc(1)NeuAc(2)
P11279	84	Hex(7)HexNAc(6)Fuc(1)NeuAc(3)		P13473	257	Hex(6)HexNAc(5)Fuc(2)
P11279	84	Hex(7)HexNAc(6)Fuc(1)NeuAc(4)		P13473	257	Hex(6)HexNAc(5)NeuAc(1)
P11279	84	Hex(7)HexNAc(6)Fuc(2)NeuAc(2)		P13473	257	Hex(7)HexNAc(6)Fuc(1)NeuAc(1)
P11279	84	Hex(7)HexNAc(6)Fuc(2)NeuAc(3)		P13473	257	Hex(7)HexNAc(6)Fuc(1)NeuAc(2)
P11279	103	Hex(6)HexNAc(2)		P13473	257	Hex(7)HexNAc(6)Fuc(2)
P11279	103	Hex(7)HexNAc(2)		P13473	257	Hex(9)HexNAc(2)
P11279	103	Hex(8)HexNAc(2)		P13473	356	Hex(5)HexNAc(4)Fuc(1)
P11279	107	Hex(6)HexNAc(5)Fuc(4)NeuAc(2)		P13473	356	Hex(5)HexNAc(4)Fuc(1)NeuAc(1)
P11279	107	Hex(7)HexNAc(6)Fuc(3)NeuAc(1)		P13473	356	Hex(5)HexNAc(4)NeuAc(1)
P11279	249	Hex(6)HexNAc(5)Fuc(1)NeuAc(2)		P13473	356	Hex(6)HexNAc(2)
P11279	261	Hex(5)HexNAc(4)Fuc(1)		P13473	356	Hex(6)HexNAc(5)Fuc(1)
P11279	261	Hex(5)HexNAc(4)Fuc(1)NeuAc(1)		P13473	356	Hex(6)HexNAc(5)Fuc(1)NeuAc(1)
P11279	261	Hex(6)HexNAc(2)		P13473	356	Hex(7)HexNAc(2)
P11279	261	Hex(6)HexNAc(5)Fuc(1)NeuAc(1)		P13473	356	Hex(8)HexNAc(2)
P11279	261	Hex(7)HexNAc(2)		P13674	113	Hex(9)HexNAc(2)
P11279	261	Hex(7)HexNAc(6)Fuc(1)		P13987	43	Hex(5)HexNAc(4)Fuc(1)NeuAc(1)
P11279	261	Hex(7)HexNAc(6)Fuc(1)NeuAc(2)		P13987	43	Hex(5)HexNAc(4)Fuc(1)NeuAc(2)
P11279	261	Hex(7)HexNAc(6)Fuc(3)		P13987	43	Hex(5)HexNAc(4)Fuc(2)NeuAc(1)
P11279	261	Hex(8)HexNAc(2)		P13987	43	Hex(5)HexNAc(4)Fuc(3)NeuAc(1)
P11279	322	Hex(10)HexNAc(2)		P13987	43	Hex(5)HexNAc(4)NeuAc(2)
P11279	322	Hex(8)HexNAc(2)		P13987	43	Hex(6)HexNAc(5)Fuc(1)NeuAc(1)
P11279	322	Hex(9)HexNAc(2)		P13987	43	Hex(6)HexNAc(5)Fuc(2)NeuAc(1)
P11717	400	Hex(8)HexNAc(2)		P14625	217	Hex(6)HexNAc(2)
P11717	581	Hex(7)HexNAc(2)		P14625	217	Hex(7)HexNAc(2)
P11717	581	Hex(8)HexNAc(2)		P14625	217	Hex(8)HexNAc(2)
P11717	871	Hex(5)HexNAc(4)Fuc(1)NeuAc(2)		P14625	217	Hex(9)HexNAc(2)
P11717	1312	Hex(8)HexNAc(2)		P15144	128	Hex(5)HexNAc(4)NeuAc(1)
P11717	1656	Hex(5)HexNAc(4)Fuc(1)NeuAc(2)		P15144	128	Hex(5)HexNAc(4)NeuAc(2)
P11717	1656	Hex(9)HexNAc(2)		P15144	128	Hex(7)HexNAc(2)
P11717	2136	Hex(5)HexNAc(4)Fuc(1)NeuAc(1)		P15144	234	Hex(5)HexNAc(4)Fuc(3)NeuAc(1)
P11717	2136	Hex(5)HexNAc(4)Fuc(1)NeuAc(2)		P15144	234	Hex(5)HexNAc(4)NeuAc(1)
P11717	2136	Hex(5)HexNAc(4)Fuc(2)NeuAc(1)		P15144	234	Hex(6)HexNAc(2)
P11717	2136	Hex(5)HexNAc(4)Fuc(3)NeuAc(1)		P15144	234	Hex(6)HexNAc(5)NeuAc(1)
P13473	49	Hex(6)HexNAc(5)Fuc(1)NeuAc(2)		P15144	234	Hex(6)HexNAc(5)NeuAc(2)
P13473	49	Hex(6)HexNAc(5)NeuAc(1)		P15144	234	Hex(7)HexNAc(2)
P13473	49	Hex(6)HexNAc(5)NeuAc(2)		P15144	265	Hex(5)HexNAc(4)Fuc(3)NeuAc(1)
P13473	49	Hex(7)HexNAc(6)NeuAc(2)		P15144	265	Hex(5)HexNAc(4)Fuc(3)NeuAc(2)
P13473	257	Hex(5)HexNAc(4)Fuc(1)NeuAc(1)		P15144	265	Hex(5)HexNAc(4)NeuAc(1)
P13473	257	Hex(6)HexNAc(5)Fuc(1)		P15144	265	Hex(5)HexNAc(4)NeuAc(2)
P13473	257	Hex(6)HexNAc(5)Fuc(1)NeuAc(1)		P15144	265	Hex(5)HexNAc(6)Fuc(2)
P13473	257	Hex(6)HexNAc(5)Fuc(1)NeuAc(2)		P15144	265	Hex(6)HexNAc(5)Fuc(1)NeuAc(1)
P13473	257	Hex(6)HexNAc(5)Fuc(2)		P15144	265	Hex(6)HexNAc(5)Fuc(1)NeuAc(2)
P13473	257	Hex(7)HexNAc(6)Fuc(1)		P15144	265	Hex(6)HexNAc(5)NeuAc(1)
P13473	257	Hex(7)HexNAc(6)Fuc(1)NeuAc(1)		P15144	265	Hex(6)HexNAc(5)NeuAc(3)
P13473	257	Hex(7)HexNAc(6)Fuc(2)		P15144	265	Hex(7)HexNAc(6)Fuc(1)NeuAc(1)
P13473	257	Hex(7)HexNAc(6)NeuAc(2)		P15144	265	Hex(7)HexNAc(6)NeuAc(1)
P13473	257	Hex(8)HexNAc(2)		P15144	265	Hex(7)HexNAc(6)NeuAc(3)
P13473	257	Hex(9)HexNAc(2)		P15144	265	Hex(7)HexNAc(6)NeuAc(4)
P13473	356	Hex(5)HexNAc(4)Fuc(1)		P15144	818	Hex(7)HexNAc(6)Fuc(1)
P13473	356	Hex(5)HexNAc(4)Fuc(1)NeuAc(1)		P15144	818	Hex(7)HexNAc(6)Fuc(1)NeuAc(1)
P13473	356	Hex(5)HexNAc(4)NeuAc(1)		P15144	818	Hex(7)HexNAc(6)Fuc(1)NeuAc(2)
P13473	356	Hex(6)HexNAc(2)		P15144	818	Hex(7)HexNAc(6)NeuAc(2)
P13473	356	Hex(6)HexNAc(3)NeuAc(1)		P16070	57	Hex(5)HexNAc(4)Fuc(1)
P13473	356	Hex(6)HexNAc(5)Fuc(1)		P16422	111	Hex(4)HexNAc(3)NeuAc(1)
P13473	356	Hex(6)HexNAc(5)Fuc(1)NeuAc(1)		P16422	111	Hex(5)HexNAc(3)NeuAc(1)
P13473	356	Hex(6)HexNAc(5)Fuc(1)NeuAc(2)		P16422	111	Hex(7)HexNAc(2)
P13473	356	Hex(6)HexNAc(5)Fuc(2)		P16422	111	Hex(8)HexNAc(2)
P13473	356	Hex(6)HexNAc(5)Fuc(2)NeuAc(1)		P17301	105	Hex(5)HexNAc(4)Fuc(1)NeuAc(2)
P13473	356	Hex(6)HexNAc(5)Fuc(3)		P17301	1057	Hex(5)HexNAc(4)Fuc(1)NeuAc(1)
P13473	356	Hex(6)HexNAc(5)NeuAc(1)		P17301	1057	Hex(5)HexNAc(4)Fuc(1)NeuAc(2)
P13473	356	Hex(7)HexNAc(2)		P18464	110	Hex(10)HexNAc(2)
P13473	356	Hex(8)HexNAc(2)		P18464	110	Hex(4)HexNAc(5)Fuc(2)
P13674	113	Hex(9)HexNAc(2)		P18464	110	Hex(5)HexNAc(5)
P13987	43	Hex(5)HexNAc(4)Fuc(1)NeuAc(1)		P18464	110	Hex(6)HexNAc(2)
P13987	43	Hex(5)HexNAc(4)Fuc(1)NeuAc(2)		P18464	110	Hex(6)HexNAc(4)Fuc(1)
P13987	43	Hex(5)HexNAc(4)Fuc(2)NeuAc(1)		P18465	110	Hex(3)HexNAc(6)Fuc(2)
P13987	43	Hex(5)HexNAc(4)Fuc(3)NeuAc(1)		P18465	110	Hex(4)HexNAc(5)Fuc(1)
P13987	43	Hex(6)HexNAc(5)Fuc(2)NeuAc(2)		P18465	110	Hex(4)HexNAc(5)Fuc(2)
P13987	43	Hex(6)HexNAc(5)Fuc(4)NeuAc(1)		P18465	110	Hex(5)HexNAc(3)Fuc(1)NeuAc(2)
P13987	43	Hex(6)HexNAc(5)NeuAc(3)		P18465	110	Hex(5)HexNAc(4)Fuc(1)NeuAc(1)
P14625	217	Hex(6)HexNAc(2)		P18465	110	Hex(5)HexNAc(4)Fuc(1)NeuAc(2)
P14625	217	Hex(7)HexNAc(2)		P18465	110	Hex(5)HexNAc(4)Fuc(2)NeuAc(1)
P14625	217	Hex(8)HexNAc(2)		P18465	110	Hex(5)HexNAc(5)Fuc(1)
P14625	217	Hex(9)HexNAc(2)		P18465	110	Hex(5)HexNAc(5)Fuc(2)
P15144	128	Hex(5)HexNAc(4)		P18465	110	Hex(6)HexNAc(5)Fuc(2)
P15144	128	Hex(5)HexNAc(4)NeuAc(1)		P18465	110	Hex(6)HexNAc(5)NeuAc(1)
P15144	128	Hex(5)HexNAc(4)NeuAc(2)		P18465	110	Hex(9)HexNAc(2)
P15144	128	Hex(6)HexNAc(2)		P20645	83	Hex(5)HexNAc(4)Fuc(2)NeuAc(1)
P15144	128	Hex(7)HexNAc(2)		P20645	83	Hex(6)HexNAc(5)Fuc(1)NeuAc(1)
P15144	234	Hex(5)HexNAc(4)		P21589	311	Hex(7)HexNAc(2)
P15144	234	Hex(5)HexNAc(4)Fuc(1)		P21589	311	Hex(8)HexNAc(2)
P15144	234	Hex(5)HexNAc(4)NeuAc(1)		P21589	333	Hex(5)HexNAc(4)Fuc(1)NeuAc(1)
P15144	234	Hex(6)HexNAc(2)		P21589	333	Hex(5)HexNAc(4)Fuc(1)NeuAc(2)
P15144	234	Hex(6)HexNAc(5)Fuc(1)NeuAc(1)		P21589	333	Hex(6)HexNAc(5)Fuc(1)NeuAc(1)
P15144	234	Hex(6)HexNAc(5)Fuc(1)NeuAc(2)		P21589	333	Hex(6)HexNAc(5)Fuc(1)NeuAc(2)
P15144	234	Hex(6)HexNAc(5)Fuc(4)		P21589	333	Hex(6)HexNAc(5)Fuc(1)NeuAc(3)
P15144	234	Hex(6)HexNAc(5)NeuAc(1)		P21589	333	Hex(7)HexNAc(6)Fuc(1)NeuAc(1)
P15144	234	Hex(6)HexNAc(5)NeuAc(2)		P21589	333	Hex(7)HexNAc(6)Fuc(1)NeuAc(2)
P15144	234	Hex(7)HexNAc(2)		P21589	333	Hex(7)HexNAc(6)Fuc(1)NeuAc(4)
P15144	234	Hex(8)HexNAc(2)		P23229	78	Hex(6)HexNAc(3)Fuc(1)NeuAc(1)
P15144	265	Hex(5)HexNAc(4)NeuAc(1)		P23229	409	Hex(8)HexNAc(2)
P15144	265	Hex(5)HexNAc(4)NeuAc(2)		P23229	770	Hex(5)HexNAc(4)Fuc(1)
P15144	265	Hex(6)HexNAc(5)Fuc(1)NeuAc(2)		P23229	770	Hex(5)HexNAc(4)Fuc(1)NeuAc(1)
P15144	265	Hex(6)HexNAc(5)Fuc(4)NeuAc(1)		P23229	966	Hex(7)HexNAc(2)
P15144	265	Hex(6)HexNAc(5)NeuAc(1)		P26006	86	Hex(5)HexNAc(4)Fuc(1)NeuAc(2)
P15144	265	Hex(6)HexNAc(5)NeuAc(3)		P26006	86	Hex(6)HexNAc(5)Fuc(1)
P15144	265	Hex(7)HexNAc(6)Fuc(1)NeuAc(3)		P26006	86	Hex(6)HexNAc(5)Fuc(1)NeuAc(1)
P15144	265	Hex(7)HexNAc(6)NeuAc(3)		P26006	86	Hex(6)HexNAc(5)Fuc(1)NeuAc(2)
P15144	265	Hex(7)HexNAc(6)NeuAc(4)		P26006	86	Hex(6)HexNAc(5)Fuc(1)NeuAc(3)
P15144	818	Hex(7)HexNAc(6)Fuc(1)NeuAc(2)		P26006	107	Hex(6)HexNAc(5)Fuc(1)NeuAc(3)
P16070	57	Hex(5)HexNAc(4)Fuc(1)NeuAc(2)		P26006	107	Hex(7)HexNAc(6)Fuc(1)NeuAc(4)
P16070	57	Hex(6)HexNAc(5)Fuc(1)NeuAc(3)		P26006	605	Hex(8)HexNAc(2)
P16422	111	Hex(4)HexNAc(3)NeuAc(1)		P26006	926	Hex(6)HexNAc(5)
P16422	111	Hex(5)HexNAc(3)NeuAc(1)		P26006	926	Hex(6)HexNAc(5)Fuc(1)
P16422	111	Hex(7)HexNAc(2)		P26006	926	Hex(6)HexNAc(5)Fuc(1)NeuAc(1)
P16422	111	Hex(8)HexNAc(2)		P26006	926	Hex(6)HexNAc(5)Fuc(3)
P17301	105	Hex(5)HexNAc(4)Fuc(1)NeuAc(1)		P26006	926	Hex(6)HexNAc(5)NeuAc(1)
P17301	105	Hex(5)HexNAc(4)Fuc(1)NeuAc(2)		P26006	935	Hex(9)HexNAc(2)
P17301	1057	Hex(5)HexNAc(4)Fuc(1)NeuAc(1)		P26006	969	Hex(6)HexNAc(5)Fuc(1)NeuAc(1)
P17301	1057	Hex(5)HexNAc(4)Fuc(1)NeuAc(2)		P26006	969	Hex(6)HexNAc(5)Fuc(2)
P18464	110	Hex(10)HexNAc(2)		P26006	969	Hex(6)HexNAc(5)Fuc(2)NeuAc(1)
P18464	110	Hex(5)HexNAc(4)Fuc(1)NeuAc(1)		P27487	150	Hex(6)HexNAc(5)Fuc(1)NeuAc(3)
P18464	110	Hex(5)HexNAc(6)		P27487	150	Hex(7)HexNAc(6)Fuc(1)NeuAc(1)
P18465	110	Hex(10)HexNAc(2)		P28799	236	Hex(2)HexNAc(2)Fuc(1)
P18465	110	Hex(3)HexNAc(6)Fuc(2)		P28799	236	Hex(8)HexNAc(2)
P18465	110	Hex(4)HexNAc(5)Fuc(1)		P28799	236	Hex(9)HexNAc(2)
P18465	110	Hex(4)HexNAc(5)Fuc(2)		P28799	530	Hex(8)HexNAc(2)
P18465	110	Hex(5)HexNAc(4)Fuc(1)NeuAc(2)		P30443	110	Hex(3)HexNAc(6)Fuc(2)
P18465	110	Hex(5)HexNAc(4)Fuc(2)NeuAc(1)		P30443	110	Hex(5)HexNAc(4)Fuc(1)NeuAc(1)
P18465	110	Hex(5)HexNAc(4)Fuc(3)NeuAc(1)		P30443	110	Hex(5)HexNAc(4)Fuc(1)NeuAc(2)
P18465	110	Hex(5)HexNAc(4)NeuAc(2)		P30443	110	Hex(5)HexNAc(4)Fuc(2)NeuAc(1)
P18465	110	Hex(5)HexNAc(5)Fuc(2)		P30443	110	Hex(5)HexNAc(4)NeuAc(2)
P18465	110	Hex(5)HexNAc(5)Fuc(3)		P30443	110	Hex(5)HexNAc(5)Fuc(1)NeuAc(1)
P18465	110	Hex(5)HexNAc(6)Fuc(2)NeuAc(1)		P30443	110	Hex(6)HexNAc(3)Fuc(1)NeuAc(1)
P18465	110	Hex(9)HexNAc(2)		P30443	110	Hex(6)HexNAc(5)
P20645	83	Hex(5)HexNAc(4)Fuc(1)NeuAc(1)		P30453	110	Hex(10)HexNAc(2)
P20645	83	Hex(5)HexNAc(4)Fuc(1)NeuAc(2)		P30453	110	Hex(3)HexNAc(3)Fuc(1)
P20645	83	Hex(5)HexNAc(4)Fuc(2)NeuAc(1)		P30453	110	Hex(3)HexNAc(6)Fuc(2)
P20645	83	Hex(5)HexNAc(4)Fuc(3)NeuAc(1)		P30453	110	Hex(4)HexNAc(2)Fuc(1)
P20645	83	Hex(6)HexNAc(5)Fuc(2)		P30453	110	Hex(4)HexNAc(5)Fuc(2)
P20645	83	Hex(6)HexNAc(5)Fuc(2)NeuAc(1)		P30453	110	Hex(5)HexNAc(4)Fuc(1)NeuAc(2)
P21589	311	Hex(7)HexNAc(2)		P30453	110	Hex(6)HexNAc(3)Fuc(1)NeuAc(1)
P21589	311	Hex(8)HexNAc(2)		P30453	110	Hex(6)HexNAc(5)
P21589	333	Hex(5)HexNAc(4)Fuc(1)NeuAc(1)		P30453	110	Hex(8)HexNAc(2)
P21589	333	Hex(5)HexNAc(4)Fuc(1)NeuAc(2)		P30453	110	Hex(9)HexNAc(2)
P21589	333	Hex(5)HexNAc(4)Fuc(3)NeuAc(1)		P30459	110	Hex(5)HexNAc(4)NeuAc(1)
P21589	333	Hex(6)HexNAc(5)Fuc(1)NeuAc(1)		P30459	110	Hex(5)HexNAc(4)NeuAc(2)
P21589	333	Hex(6)HexNAc(5)Fuc(1)NeuAc(2)		P30459	110	Hex(5)HexNAc(6)
P21589	333	Hex(7)HexNAc(6)Fuc(1)NeuAc(2)		P30459	110	Hex(9)HexNAc(2)
P21589	333	Hex(7)HexNAc(6)Fuc(3)NeuAc(2)		P30460	110	Hex(3)HexNAc(6)Fuc(2)
P23229	78	Hex(6)HexNAc(3)Fuc(1)NeuAc(1)		P30460	110	Hex(4)HexNAc(5)Fuc(1)
P23229	409	Hex(8)HexNAc(2)		P30460	110	Hex(4)HexNAc(5)Fuc(2)
P23229	770	Hex(5)HexNAc(4)Fuc(1)		P30460	110	Hex(5)HexNAc(4)Fuc(1)
P23229	770	Hex(5)HexNAc(4)Fuc(1)NeuAc(1)		P30460	110	Hex(5)HexNAc(4)Fuc(1)NeuAc(1)
P23229	966	Hex(7)HexNAc(2)		P30460	110	Hex(5)HexNAc(4)Fuc(1)NeuAc(2)
P26006	86	Hex(5)HexNAc(4)Fuc(1)NeuAc(2)		P30460	110	Hex(5)HexNAc(4)Fuc(2)NeuAc(1)
P26006	86	Hex(6)HexNAc(5)Fuc(1)NeuAc(1)		P30460	110	Hex(5)HexNAc(4)Fuc(2)NeuAc(2)
P26006	86	Hex(6)HexNAc(5)Fuc(1)NeuAc(3)		P30460	110	Hex(5)HexNAc(4)Fuc(3)NeuAc(1)
P26006	107	Hex(10)HexNAc(2)		P30460	110	Hex(5)HexNAc(4)NeuAc(1)
P26006	107	Hex(6)HexNAc(5)Fuc(1)NeuAc(2)		P30460	110	Hex(5)HexNAc(4)NeuAc(2)
P26006	107	Hex(9)HexNAc(2)		P30460	110	Hex(5)HexNAc(5)Fuc(1)NeuAc(1)
P26006	265	Hex(5)HexNAc(4)Fuc(1)NeuAc(2)		P30460	110	Hex(5)HexNAc(5)NeuAc(1)
P26006	265	Hex(5)HexNAc(4)NeuAc(2)		P30460	110	Hex(6)HexNAc(4)Fuc(2)
P26006	605	Hex(8)HexNAc(2)		P30460	110	Hex(6)HexNAc(5)Fuc(1)
P26006	926	Hex(6)HexNAc(5)		P30460	110	Hex(6)HexNAc(5)Fuc(1)NeuAc(2)
P26006	926	Hex(6)HexNAc(5)Fuc(1)		P30460	110	Hex(6)HexNAc(5)Fuc(1)NeuAc(3)
P26006	926	Hex(6)HexNAc(5)Fuc(1)NeuAc(1)		P30460	110	Hex(6)HexNAc(5)Fuc(2)
P26006	926	Hex(6)HexNAc(5)Fuc(2)		P30460	110	Hex(6)HexNAc(5)Fuc(2)NeuAc(2)
P26006	926	Hex(6)HexNAc(5)NeuAc(1)		P30460	110	Hex(6)HexNAc(5)Fuc(3)
P26006	935	Hex(8)HexNAc(2)		P30460	110	Hex(6)HexNAc(5)NeuAc(1)
P26006	935	Hex(9)HexNAc(2)		P30460	110	Hex(6)HexNAc(5)NeuAc(3)
P26006	969	Hex(5)HexNAc(4)NeuAc(1)		P30460	110	Hex(9)HexNAc(2)
P26006	969	Hex(6)HexNAc(5)Fuc(1)		P30462	110	Hex(4)HexNAc(4)NeuAc(1)
P26006	969	Hex(6)HexNAc(5)Fuc(1)NeuAc(1)		P30462	110	Hex(5)HexNAc(3)Fuc(1)NeuAc(2)
P26006	969	Hex(6)HexNAc(5)Fuc(2)		P30464	110	Hex(5)HexNAc(5)Fuc(1)NeuAc(1)
P26006	969	Hex(6)HexNAc(5)Fuc(3)		P30464	110	Hex(6)HexNAc(3)NeuAc(1)
P26006	969	Hex(6)HexNAc(5)NeuAc(1)		P30464	110	Hex(8)HexNAc(2)
P27487	150	Hex(6)HexNAc(5)Fuc(1)NeuAc(3)		P30483	110	Hex(5)HexNAc(4)Fuc(1)NeuAc(2)
P27487	685	Hex(5)HexNAc(4)Fuc(1)NeuAc(2)		P30498	110	Hex(3)HexNAc(4)Fuc(1)
P28799	236	Hex(2)HexNAc(2)Fuc(1)		P30498	110	Hex(5)HexNAc(5)Fuc(1)NeuAc(1)
P28799	236	Hex(8)HexNAc(2)		P30498	110	Hex(5)HexNAc(5)Fuc(2)NeuAc(1)
P28799	236	Hex(9)HexNAc(2)		P30498	110	Hex(6)HexNAc(3)NeuAc(1)
P28799	530	Hex(8)HexNAc(2)		P30511	107	Hex(10)HexNAc(2)
P28799	530	Hex(9)HexNAc(2)		P30511	107	Hex(8)HexNAc(2)
P30443	110	Hex(5)HexNAc(4)Fuc(1)NeuAc(1)		P30511	107	Hex(9)HexNAc(2)
P30443	110	Hex(5)HexNAc(4)Fuc(1)NeuAc(2)		P42892	210	Hex(6)HexNAc(5)NeuAc(3)
P30443	110	Hex(5)HexNAc(4)Fuc(2)NeuAc(1)		P42892	210	Hex(7)HexNAc(6)NeuAc(4)
P30443	110	Hex(5)HexNAc(4)NeuAc(2)		P43307	136	Hex(3)HexNAc(6)
P30443	110	Hex(5)HexNAc(5)Fuc(1)NeuAc(1)		P43307	136	Hex(8)HexNAc(2)
P30443	110	Hex(6)HexNAc(3)Fuc(1)NeuAc(1)		P43307	136	Hex(9)HexNAc(2)
P30443	110	Hex(7)HexNAc(6)Fuc(2)NeuAc(1)		P43308	88	Hex(8)HexNAc(2)
P30453	110	Hex(10)HexNAc(2)		P43308	88	Hex(9)HexNAc(2)
P30453	110	Hex(3)HexNAc(6)Fuc(2)		P46977	548	Hex(10)HexNAc(2)
P30453	110	Hex(4)HexNAc(2)Fuc(1)		P46977	548	Hex(8)HexNAc(2)
P30453	110	Hex(4)HexNAc(5)Fuc(2)		P46977	548	Hex(9)HexNAc(2)
P30453	110	Hex(5)HexNAc(4)Fuc(1)NeuAc(1)		P48509	159	Hex(5)HexNAc(4)Fuc(1)NeuAc(1)
P30453	110	Hex(5)HexNAc(4)Fuc(1)NeuAc(2)		P48509	159	Hex(5)HexNAc(4)NeuAc(1)
P30453	110	Hex(5)HexNAc(4)Fuc(2)NeuAc(1)		P48509	159	Hex(6)HexNAc(5)Fuc(1)
P30453	110	Hex(5)HexNAc(4)Fuc(3)NeuAc(1)		P48509	159	Hex(6)HexNAc(5)Fuc(1)NeuAc(2)
P30453	110	Hex(6)HexNAc(5)		P48509	159	Hex(6)HexNAc(5)Fuc(2)
P30453	110	Hex(7)HexNAc(2)		P48509	159	Hex(6)HexNAc(5)NeuAc(1)
P30453	110	Hex(8)HexNAc(2)		P48509	159	Hex(6)HexNAc(5)NeuAc(2)
P30453	110	Hex(9)HexNAc(2)		P50454	120	Hex(6)HexNAc(2)
P30459	110	Hex(5)HexNAc(4)Fuc(1)NeuAc(1)		P50454	120	Hex(7)HexNAc(2)
P30459	110	Hex(5)HexNAc(4)Fuc(1)NeuAc(2)		P50454	120	Hex(8)HexNAc(2)
P30459	110	Hex(5)HexNAc(4)NeuAc(2)		P50454	120	Hex(9)HexNAc(2)
P30460	110	Hex(4)HexNAc(5)Fuc(2)		P50454	125	Hex(6)HexNAc(2)
P30460	110	Hex(5)HexNAc(3)Fuc(1)NeuAc(2)		P50454	125	Hex(7)HexNAc(2)
P30460	110	Hex(5)HexNAc(4)Fuc(1)NeuAc(1)		P50454	125	Hex(8)HexNAc(2)
P30460	110	Hex(5)HexNAc(4)Fuc(1)NeuAc(2)		P50454	125	Hex(9)HexNAc(2)
P30460	110	Hex(5)HexNAc(4)Fuc(2)NeuAc(1)		P50897	197	Hex(10)HexNAc(2)
P30460	110	Hex(5)HexNAc(4)Fuc(2)NeuAc(2)		P53801	54	Hex(7)HexNAc(2)
P30460	110	Hex(5)HexNAc(4)Fuc(3)NeuAc(1)		P53801	54	Hex(8)HexNAc(2)
P30460	110	Hex(5)HexNAc(4)NeuAc(2)		P53801	54	Hex(9)HexNAc(2)
P30460	110	Hex(5)HexNAc(5)Fuc(1)NeuAc(1)		P54709	124	Hex(5)HexNAc(4)Fuc(1)NeuAc(1)
P30460	110	Hex(5)HexNAc(5)Fuc(1)NeuAc(2)		P54709	124	Hex(5)HexNAc(4)Fuc(1)NeuAc(2)
P30460	110	Hex(6)HexNAc(3)NeuAc(1)		P54709	124	Hex(7)HexNAc(6)Fuc(1)NeuAc(1)
P30460	110	Hex(6)HexNAc(5)Fuc(1)NeuAc(2)		P54709	124	Hex(7)HexNAc(6)Fuc(3)
P30460	110	Hex(6)HexNAc(5)Fuc(1)NeuAc(3)		P78536	174	Hex(6)HexNAc(5)Fuc(2)NeuAc(3)
P30460	110	Hex(6)HexNAc(5)Fuc(2)NeuAc(2)		P78536	174	Hex(7)HexNAc(6)Fuc(3)NeuAc(1)
P30460	110	Hex(6)HexNAc(5)Fuc(3)NeuAc(2)		P78536	594	Hex(7)HexNAc(2)
P30460	110	Hex(6)HexNAc(5)NeuAc(3)		P78536	594	Hex(8)HexNAc(2)
P30460	110	Hex(6)HexNAc(6)Fuc(1)		Q02809	538	Hex(8)HexNAc(2)
P30462	110	Hex(4)HexNAc(4)NeuAc(1)		Q02809	538	Hex(9)HexNAc(2)
P30462	110	Hex(4)HexNAc(5)Fuc(2)		Q08380	69	Hex(8)HexNAc(2)
P30462	110	Hex(5)HexNAc(3)Fuc(1)NeuAc(2)		Q08380	69	Hex(9)HexNAc(2)
P30462	110	Hex(5)HexNAc(4)Fuc(1)		Q08380	125	Hex(8)HexNAc(2)
P30464	110	Hex(4)HexNAc(3)Fuc(1)		Q08380	125	Hex(9)HexNAc(2)
P30464	110	Hex(5)HexNAc(4)Fuc(1)NeuAc(2)		Q08380	192	Hex(9)HexNAc(2)
P30464	110	Hex(6)HexNAc(3)Fuc(1)NeuAc(1)		Q08380	398	Hex(10)HexNAc(2)
P30464	110	Hex(6)HexNAc(3)NeuAc(1)		Q08380	398	Hex(9)HexNAc(2)
P30483	110	Hex(10)HexNAc(2)		Q08380	551	Hex(10)HexNAc(2)
P30483	110	Hex(5)HexNAc(4)Fuc(1)NeuAc(2)		Q08380	551	Hex(8)HexNAc(2)
P30498	110	Hex(5)HexNAc(4)Fuc(1)NeuAc(1)		Q08380	551	Hex(9)HexNAc(2)
P30498	110	Hex(5)HexNAc(4)NeuAc(2)		Q08380	580	Hex(8)HexNAc(2)
P30511	107	Hex(10)HexNAc(2)		Q08722	73	Hex(7)HexNAc(2)
P30511	107	Hex(4)HexNAc(6)		Q08722	111	Hex(6)HexNAc(5)Fuc(1)NeuAc(1)
P30511	107	Hex(5)HexNAc(6)		Q08722	111	Hex(6)HexNAc(5)Fuc(1)NeuAc(2)
P30511	107	Hex(8)HexNAc(2)		Q08722	111	Hex(6)HexNAc(5)Fuc(2)
P30511	107	Hex(9)HexNAc(2)		Q08722	111	Hex(6)HexNAc(5)Fuc(2)NeuAc(1)
P35613	268	Hex(10)HexNAc(2)		Q08722	111	Hex(6)HexNAc(5)NeuAc(2)
P35613	268	Hex(8)HexNAc(2)		Q13641	275	Hex(6)HexNAc(5)Fuc(1)NeuAc(1)
P42892	166	Hex(5)HexNAc(4)Fuc(1)		Q13641	275	Hex(6)HexNAc(5)Fuc(1)NeuAc(2)
P42892	210	Hex(6)HexNAc(5)NeuAc(3)		Q13740	167	Hex(5)HexNAc(4)Fuc(1)
P42892	210	Hex(7)HexNAc(6)NeuAc(4)		Q13740	265	Hex(7)HexNAc(6)Fuc(1)NeuAc(1)
P43307	136	Hex(8)HexNAc(2)		Q13740	265	Hex(7)HexNAc(6)Fuc(1)NeuAc(4)
P43307	136	Hex(9)HexNAc(2)		Q13740	306	Hex(6)HexNAc(5)Fuc(1)NeuAc(3)
P43308	88	Hex(7)HexNAc(2)		Q13740	361	Hex(5)HexNAc(4)Fuc(1)NeuAc(2)
P43308	88	Hex(8)HexNAc(2)		Q13740	361	Hex(6)HexNAc(5)Fuc(1)NeuAc(1)
P43308	88	Hex(9)HexNAc(2)		Q13740	361	Hex(6)HexNAc(5)Fuc(1)NeuAc(2)
P46977	548	Hex(10)HexNAc(2)		Q13740	361	Hex(6)HexNAc(5)Fuc(1)NeuAc(3)
P46977	548	Hex(4)HexNAc(6)		Q13740	480	Hex(5)HexNAc(4)Fuc(1)NeuAc(1)
P46977	548	Hex(8)HexNAc(2)		Q13740	480	Hex(6)HexNAc(5)Fuc(1)
P46977	548	Hex(9)HexNAc(2)		Q13740	480	Hex(6)HexNAc(5)Fuc(1)NeuAc(1)
P48509	159	Hex(5)HexNAc(4)Fuc(1)NeuAc(1)		Q14108	249	Hex(8)HexNAc(2)
P48509	159	Hex(5)HexNAc(4)NeuAc(1)		Q14108	412	Hex(9)HexNAc(2)
P48509	159	Hex(6)HexNAc(5)Fuc(1)NeuAc(1)		Q14126	182	Hex(5)HexNAc(4)Fuc(1)NeuAc(1)
P48509	159	Hex(6)HexNAc(5)Fuc(1)NeuAc(2)		Q14508	44	Hex(8)HexNAc(2)
P48509	159	Hex(6)HexNAc(5)NeuAc(2)		Q16563	71	Hex(5)HexNAc(6)Fuc(3)
P48509	159	Hex(6)HexNAc(5)NeuAc(3)		Q16563	71	Hex(6)HexNAc(3)NeuAc(1)
P50454	120	Hex(7)HexNAc(2)		Q16563	71	Hex(7)HexNAc(2)
P50454	120	Hex(8)HexNAc(2)		Q5JPE7	218	Hex(8)HexNAc(2)
P50454	120	Hex(9)HexNAc(2)		Q5JPE7	218	Hex(9)HexNAc(2)
P50454	125	Hex(6)HexNAc(2)		Q5ZPR3	91	Hex(5)HexNAc(4)Fuc(1)NeuAc(2)
P50454	125	Hex(7)HexNAc(2)		Q5ZPR3	433	Hex(5)HexNAc(4)Fuc(1)NeuAc(2)
P50454	125	Hex(8)HexNAc(2)		Q6YHK3	419	Hex(9)HexNAc(2)
P50454	125	Hex(9)HexNAc(2)		Q8IV08	284	Hex(8)HexNAc(2)
P50897	197	Hex(10)HexNAc(2)		Q8N766	913	Hex(8)HexNAc(2)
P50897	197	Hex(9)HexNAc(2)		Q8N766	913	Hex(9)HexNAc(2)
P53801	54	Hex(7)HexNAc(2)		Q8NBJ4	144	Hex(5)HexNAc(4)Fuc(2)NeuAc(2)
P53801	54	Hex(8)HexNAc(2)		Q8NFQ8	286	Hex(8)HexNAc(2)
P53801	54	Hex(9)HexNAc(2)		Q8TCJ2	627	Hex(10)HexNAc(2)
P54709	124	Hex(5)HexNAc(4)Fuc(1)NeuAc(1)		Q8TCJ2	627	Hex(8)HexNAc(2)
P54709	124	Hex(5)HexNAc(4)Fuc(1)NeuAc(2)		Q8TCJ2	627	Hex(9)HexNAc(2)
P54709	124	Hex(6)HexNAc(5)Fuc(1)NeuAc(1)		Q8TCJ2	641	Hex(9)HexNAc(2)
P54709	124	Hex(6)HexNAc(5)Fuc(1)NeuAc(2)		Q8TEM1	44	Hex(8)HexNAc(2)
P54709	124	Hex(6)HexNAc(5)NeuAc(2)		Q8TEM1	44	Hex(9)HexNAc(2)
P54709	124	Hex(7)HexNAc(6)Fuc(1)		Q8TEM1	405	Hex(9)HexNAc(2)
P54709	124	Hex(7)HexNAc(6)Fuc(1)NeuAc(1)		Q8TEM1	1441	Hex(9)HexNAc(2)
P54709	124	Hex(7)HexNAc(6)Fuc(3)		Q92542	45	Hex(9)HexNAc(2)
P78536	103	Hex(6)HexNAc(6)NeuAc(3)		Q92542	417	Hex(8)HexNAc(2)
P78536	594	Hex(8)HexNAc(2)		Q92542	435	Hex(8)HexNAc(2)
P78536	594	Hex(9)HexNAc(2)		Q92542	530	Hex(9)HexNAc(2)
Q02809	197	Hex(5)HexNAc(3)Fuc(1)NeuAc(2)		Q92626	731	Hex(8)HexNAc(2)
Q02809	197	Hex(8)HexNAc(2)		Q92626	731	Hex(9)HexNAc(2)
Q02809	538	Hex(8)HexNAc(2)		Q92626	1368	Hex(8)HexNAc(2)
Q02809	538	Hex(9)HexNAc(2)		Q92876	134	Hex(8)HexNAc(2)
Q08380	69	Hex(8)HexNAc(2)		Q95365	110	Hex(5)HexNAc(3)Fuc(1)NeuAc(1)
Q08380	69	Hex(9)HexNAc(2)		Q95365	110	Hex(5)HexNAc(5)NeuAc(1)
Q08380	125	Hex(8)HexNAc(2)		Q95365	110	Hex(6)HexNAc(3)Fuc(1)NeuAc(1)
Q08380	125	Hex(9)HexNAc(2)		Q96AY3	182	Hex(8)HexNAc(2)
Q08380	192	Hex(4)HexNAc(3)NeuAc(1)		Q96AY3	294	Hex(5)HexNAc(5)Fuc(2)NeuAc(1)
Q08380	192	Hex(9)HexNAc(2)		Q96AY3	310	Hex(8)HexNAc(2)
Q08380	398	Hex(10)HexNAc(2)		Q96AY3	407	Hex(7)HexNAc(2)
Q08380	398	Hex(8)HexNAc(2)		Q96AY3	407	Hex(8)HexNAc(2)
Q08380	398	Hex(9)HexNAc(2)		Q96G97	88	Hex(9)HexNAc(2)
Q08380	551	Hex(10)HexNAc(2)		Q96HE7	280	Hex(9)HexNAc(2)
Q08380	551	Hex(8)HexNAc(2)		Q99523	406	Hex(10)HexNAc(2)
Q08380	551	Hex(9)HexNAc(2)		Q99523	406	Hex(9)HexNAc(2)
Q08380	580	Hex(8)HexNAc(2)		Q9BU23	489	Hex(4)HexNAc(3)NeuAc(1)
Q08380	580	Hex(9)HexNAc(2)		Q9BU23	616	Hex(8)HexNAc(2)
Q08722	73	Hex(7)HexNAc(2)		Q9H5V8	205	Hex(5)HexNAc(4)Fuc(3)NeuAc(1)
Q08722	111	Hex(6)HexNAc(5)Fuc(1)NeuAc(1)		Q9H5V8	386	Hex(5)HexNAc(4)Fuc(1)NeuAc(1)
Q08722	111	Hex(6)HexNAc(5)Fuc(1)NeuAc(2)		Q9HDC9	160	Hex(8)HexNAc(2)
Q08722	111	Hex(6)HexNAc(5)Fuc(2)NeuAc(1)		Q9HDC9	196	Hex(8)HexNAc(2)
Q08722	111	Hex(6)HexNAc(5)NeuAc(2)		Q9NPZ5	292	Hex(8)HexNAc(2)
Q13641	124	Hex(8)HexNAc(2)		Q9NRD9	1480	Hex(5)HexNAc(4)Fuc(1)NeuAc(2)
Q13641	275	Hex(6)HexNAc(5)Fuc(1)NeuAc(2)		Q9NRD9	1480	Hex(5)HexNAc(4)NeuAc(2)
Q13641	275	Hex(6)HexNAc(5)Fuc(1)NeuAc(3)		Q9NRD9	1480	Hex(6)HexNAc(5)NeuAc(3)
Q13740	167	Hex(5)HexNAc(4)Fuc(1)NeuAc(1)		Q9NRD9	1480	Hex(6)HexNAc(6)Fuc(1)NeuAc(2)
Q13740	167	Hex(5)HexNAc(4)Fuc(1)NeuAc(2)		Q9UBV2	217	Hex(9)HexNAc(2)
Q13740	265	Hex(6)HexNAc(5)Fuc(1)NeuAc(3)		Q9UBV2	272	Hex(9)HexNAc(2)
Q13740	265	Hex(7)HexNAc(6)Fuc(1)NeuAc(4)		Q9UBV2	431	Hex(9)HexNAc(2)
Q13740	306	Hex(6)HexNAc(5)Fuc(1)NeuAc(3)		Q9UBV2	608	Hex(9)HexNAc(2)
Q13740	361	Hex(5)HexNAc(4)Fuc(1)NeuAc(2)		Q9UH99	636	Hex(6)HexNAc(2)
Q13740	361	Hex(5)HexNAc(4)Fuc(3)NeuAc(1)		Q9UH99	636	Hex(8)HexNAc(2)
Q13740	361	Hex(6)HexNAc(5)Fuc(1)NeuAc(3)		Q9UHG3	353	Hex(8)HexNAc(2)
Q13740	361	Hex(6)HexNAc(5)Fuc(3)NeuAc(2)		Q9UHG3	353	Hex(9)HexNAc(2)
Q13740	480	Hex(5)HexNAc(4)Fuc(1)NeuAc(1)		Q9UHN6	248	Hex(10)HexNAc(2)
Q13740	480	Hex(6)HexNAc(5)Fuc(1)NeuAc(1)		Q9UHN6	914	Hex(9)HexNAc(2)
Q13740	480	Hex(6)HexNAc(5)Fuc(1)NeuAc(2)		Q9UIQ6	145	Hex(8)HexNAc(2)
Q13740	480	Hex(6)HexNAc(5)NeuAc(1)		Q9UIQ6	834	Hex(6)HexNAc(5)Fuc(1)NeuAc(1)
Q13740	480	Hex(6)HexNAc(5)NeuAc(2)		Q9Y4L1	869	Hex(8)HexNAc(2)
Q14108	249	Hex(8)HexNAc(2)		Q9Y4L1	869	Hex(9)HexNAc(2)
Q14108	412	Hex(9)HexNAc(2)		Q9Y4L1	922	Hex(6)HexNAc(5)Fuc(3)NeuAc(3)
Q14126	182	Hex(5)HexNAc(4)Fuc(3)NeuAc(1)		Q9Y4L1	922	Hex(7)HexNAc(6)Fuc(3)NeuAc(2)
Q14126	462	Hex(5)HexNAc(4)Fuc(1)NeuAc(2)		P20645	83	Hex(6)HexNAc(5)Fuc(1)
Q14508	44	Hex(3)HexNAc(6)
Q14508	44	Hex(8)HexNAc(2)
Q16563	71	Hex(6)HexNAc(2)
Q16563	71	Hex(6)HexNAc(3)NeuAc(1)
Q16563	71	Hex(7)HexNAc(2)
Q5JPE7	218	Hex(8)HexNAc(2)
Q5JPE7	218	Hex(9)HexNAc(2)
Q5JPE7	369	Hex(7)HexNAc(2)
Q5JPE7	369	Hex(8)HexNAc(2)
Q5JPE7	369	Hex(9)HexNAc(2)
Q5ZPR3	91	Hex(5)HexNAc(4)Fuc(1)NeuAc(2)
Q5ZPR3	215	Hex(5)HexNAc(4)Fuc(1)NeuAc(2)
Q5ZPR3	433	Hex(5)HexNAc(4)Fuc(1)NeuAc(2)
Q5ZPR3	433	Hex(7)HexNAc(6)Fuc(3)NeuAc(2)
Q6YHK3	247	Hex(8)HexNAc(2)
Q6YHK3	337	Hex(8)HexNAc(2)
Q6YHK3	419	Hex(9)HexNAc(2)
Q8IV08	284	Hex(8)HexNAc(2)
Q8N766	913	Hex(8)HexNAc(2)
Q8N766	913	Hex(9)HexNAc(2)
Q8NBJ4	144	Hex(5)HexNAc(4)Fuc(1)NeuAc(2)
Q8NBJ4	144	Hex(5)HexNAc(4)Fuc(2)NeuAc(2)
Q8NFQ8	286	Hex(7)HexNAc(2)
Q8NFQ8	286	Hex(8)HexNAc(2)
Q8TCJ2	616	Hex(9)HexNAc(2)
Q8TCJ2	627	Hex(10)HexNAc(2)
Q8TCJ2	627	Hex(8)HexNAc(2)
Q8TCJ2	627	Hex(9)HexNAc(2)
Q8TCJ2	641	Hex(9)HexNAc(2)
Q8TEM1	44	Hex(8)HexNAc(2)
Q8TEM1	44	Hex(9)HexNAc(2)
Q8TEM1	405	Hex(9)HexNAc(2)
Q8TEM1	1441	Hex(8)HexNAc(2)
Q8TEM1	1441	Hex(9)HexNAc(2)
Q92542	45	Hex(8)HexNAc(2)
Q92542	45	Hex(9)HexNAc(2)
Q92542	387	Hex(6)HexNAc(5)Fuc(2)NeuAc(3)
Q92542	417	Hex(8)HexNAc(2)
Q92542	435	Hex(8)HexNAc(2)
Q92542	435	Hex(9)HexNAc(2)
Q92542	530	Hex(8)HexNAc(2)
Q92542	530	Hex(9)HexNAc(2)
Q92626	731	Hex(8)HexNAc(2)
Q92626	731	Hex(9)HexNAc(2)
Q92626	1368	Hex(8)HexNAc(2)
Q92876	134	Hex(8)HexNAc(2)
Q95365	110	Hex(4)HexNAc(3)Fuc(2)NeuAc(1)
Q95365	110	Hex(5)HexNAc(4)Fuc(1)NeuAc(1)
Q95365	110	Hex(5)HexNAc(5)NeuAc(1)
Q95365	110	Hex(6)HexNAc(3)Fuc(1)NeuAc(1)
Q96AY3	182	Hex(8)HexNAc(2)
Q96AY3	182	Hex(9)HexNAc(2)
Q96AY3	294	Hex(5)HexNAc(5)Fuc(2)NeuAc(1)
Q96AY3	294	Hex(8)HexNAc(2)
Q96AY3	294	Hex(9)HexNAc(2)
Q96AY3	310	Hex(6)HexNAc(2)
Q96AY3	310	Hex(7)HexNAc(2)
Q96AY3	310	Hex(8)HexNAc(2)
Q96AY3	407	Hex(7)HexNAc(2)
Q96AY3	407	Hex(8)HexNAc(2)
Q96G97	88	Hex(9)HexNAc(2)
Q96HE7	280	Hex(6)HexNAc(2)
Q96HE7	280	Hex(8)HexNAc(2)
Q96HE7	280	Hex(9)HexNAc(2)
Q99523	406	Hex(9)HexNAc(2)
Q9BU23	616	Hex(8)HexNAc(2)
Q9H5V8	122	Hex(8)HexNAc(2)
Q9H5V8	310	Hex(5)HexNAc(4)Fuc(2)NeuAc(1)
Q9H5V8	386	Hex(5)HexNAc(4)Fuc(1)
Q9H5V8	386	Hex(5)HexNAc(4)Fuc(1)NeuAc(1)
Q9H5V8	386	Hex(5)HexNAc(4)Fuc(1)NeuAc(2)
Q9H5V8	512	Hex(3)HexNAc(6)
Q9H5V8	512	Hex(8)HexNAc(2)
Q9HDC9	160	Hex(6)HexNAc(2)
Q9HDC9	160	Hex(8)HexNAc(2)
Q9HDC9	196	Hex(7)HexNAc(2)
Q9HDC9	196	Hex(8)HexNAc(2)
Q9NPZ5	292	Hex(8)HexNAc(2)
Q9NRD9	1480	Hex(5)HexNAc(4)Fuc(1)NeuAc(2)
Q9NRD9	1480	Hex(6)HexNAc(5)NeuAc(2)
Q9NRD9	1480	Hex(7)HexNAc(6)Fuc(2)NeuAc(2)
Q9UBV2	195	Hex(9)HexNAc(2)
Q9UBV2	217	Hex(9)HexNAc(2)
Q9UBV2	272	Hex(8)HexNAc(2)
Q9UBV2	272	Hex(9)HexNAc(2)
Q9UBV2	431	Hex(9)HexNAc(2)
Q9UBV2	608	Hex(4)HexNAc(6)
Q9UBV2	608	Hex(9)HexNAc(2)
Q9UH99	636	Hex(6)HexNAc(2)
Q9UH99	636	Hex(8)HexNAc(2)
Q9UHG3	353	Hex(8)HexNAc(2)
Q9UHG3	353	Hex(9)HexNAc(2)
Q9UHN6	248	Hex(9)HexNAc(2)
Q9UHN6	914	Hex(9)HexNAc(2)
Q9UIQ6	145	Hex(8)HexNAc(2)
Q9UIQ6	834	Hex(6)HexNAc(5)Fuc(1)NeuAc(2)
Q9Y4L1	515	Hex(9)HexNAc(2)
Q9Y4L1	869	Hex(8)HexNAc(2)
Q9Y4L1	869	Hex(9)HexNAc(2)
Q9Y4L1	931	Hex(6)HexNAc(2)
