# Supplementary material for: Determination of the glycoprotein specificity of lectins on cell membranes through oxidative proteomics
Source: Chem Sci. 2020 Aug 17;11(35):9501–12. doi: 10.1039/d0sc04199h (PMC8162070; doi:10.1039/d0sc04199h)
Supplement: SC-011-D0SC04199H-s006 [file SC-011-D0SC04199H-s006.xlsx]

## Sheet: WGA
Protein Code	Protein Name	Oxidation Position
P08195	4F2	M1
Q9HDC9	APMAP	M278
Q9HDC9	APMAP	T277
Q9HDC9	APMAP	M112
Q9HDC9	APMAP	M355
Q9HDC9	APMAP	M231
Q9HDC9	APMAP	M290
Q12797	ASPH	M535
P54709	AT1B3	M82
P54709	AT1B3	L81
P54709	AT1B3	V83
P54709	AT1B3	I210
P35613	BASI	L290
P35613	BASI	M292
P35613	BASI	L240
P35613	BASI	M239
Q8WVQ1	CANT1	M375
O75976	CBPD	M1207
Q13740	CD166	T219
Q13740	CD166	M114
Q5ZPR3	CD276	P363
Q96KA5	CLP1L	M378
P30825	CTR1	M365
P30825	CTR1	M13
Q14126	DSG2	M757
Q14126	DSG2	T945
Q14126	DSG2	P948
Q14126	DSG2	P927
Q14126	DSG2	M1069
Q14126	DSG2	M280
Q8N766	EMC1	M483
Q8N766	EMC1	M598
Q8N766	EMC1	L601
Q8N766	EMC1	L561
Q8N766	EMC1	M632
P14625	ENPL	M541
P14625	ENPL	M154
P14625	ENPL	M426
O75477	ERLN1	M159
Q7Z2K6	ERMP1	M800
Q04609	FOLH1	M569
Q04609	FOLH1	M583
Q04609	FOLH1	M509
Q04609	FOLH1	H345
Q04609	FOLH1	M344
Q04609	FOLH1	M664
Q04609	FOLH1	M663
Q9P2B2	FPRP	Y643
Q10472	GALT1	H146
Q92896	GSLG1	M746
Q92896	GSLG1	M403
Q92896	GSLG1	M223
Q9Y4L1	HYOU1	M88
Q9Y4L1	HYOU1	M417
Q9Y4L1	HYOU1	M275
Q9Y4L1	HYOU1	I58
Q9Y4L1	HYOU1	M56
Q9NX62	IMPA3	M315
Q9NX62	IMPA3	M66
Q9NX62	IMPA3	M117
P06756	ITAV	M589
P06756	ITAV	M64
P05556	ITB1	M170
Q5JRA6	MIA3	M1256
Q5JRA6	MIA3	M955
P11717	MPRI	M852
P11717	MPRI	Y1549
P11717	MPRI	M704
O15394	NCAM2	I459
O15394	NCAM2	M393
P08473	NEP	M377
P08473	NEP	M73
P08473	NEP	M273
P08473	NEP	M297
Q5JPE7	NOMO2	P492
Q5JPE7	NOMO2	M327
Q5JPE7	NOMO2	M543
Q5JPE7	NOMO2	M467
O15118	NPC1	M1001
O15118	NPC1	M996
O15118	NPC1	L1045
O15118	NPC1	T1036
Q02809	PLOD1	M623
Q8TEM1	PO210	M196
Q8TEM1	PO210	M1241
Q8TEM1	PO210	M1300
Q8TEM1	PO210	M211
Q8TEM1	PO210	M538
Q8TEM1	PO210	M1017
P50897	PPT1	M112
P10586	PTPRF	M1674
P10586	PTPRF	M1590
P10586	PTPRF	M1448
P04844	RPN2	L236
P04844	RPN2	L218
P04844	RPN2	M620
P04844	RPN2	M337
Q9Y666	S12A7	H776
Q9Y666	S12A7	M897
Q9Y666	S12A7	M891
Q9Y6M7	S4A7	M492
Q14108	SCRB2	M159
Q14108	SCRB2	T365
Q14108	SCRB2	I335
Q14108	SCRB2	M337
Q9H5K3	SG196	V302
Q11201	SIA4A	M42
P46977	STT3A	M150
P46977	STT3A	M639
P46977	STT3A	M559
P02786	TFR1	M432
P02786	TFR1	M436
Q8NBN3	TM87A	M142
Q7Z7H5	TMED4	M77
Q7Z7H5	TMED4	L75
Q7Z7H5	TMED4	M121
Q9BVK6	TMED9	T58
Q9BVK6	TMED9	M59
Q9BVK6	TMED9	M85
Q9BVK6	TMED9	L137
Q9BVK6	TMED9	M136
Q9BVK6	TMED9	F86
Q6ZXV5	TMTC3	M642
Q96JJ7	TMX3	F237
Q96JJ7	TMX3	M82
Q5JTV8	TOIP1	M301
Q15904	VAS1	M190

## Sheet: SNA
Protein Code	Protein Name	Oxidation Position
P11717	MPRI	M704
P11717	MPRI	M852
P11717	MPRI	T972
P11717	MPRI	M1550
P11717	MPRI	Y1676
P11717	MPRI	P1700
Q5JPE7	NOMO2	Y77
Q5JPE7	NOMO2	V493
Q5JPE7	NOMO2	M543
Q5JPE7	NOMO2	M677
Q5JPE7	NOMO2	P777
Q04609	FOLH1	M1
Q04609	FOLH1	W381
Q04609	FOLH1	M583
Q04609	FOLH1	M664
Q04609	FOLH1	M663
Q8N766	EMC1	T82
Q8N766	EMC1	M598
Q8N766	EMC1	M12
Q92896	GSLG1	M200
Q92896	GSLG1	M403
Q92896	GSLG1	M11
Q92896	GSLG1	M478
Q92896	GSLG1	T869
P05556	ITB1	M170
P05556	ITB1	M173
P05556	ITB1	T109
O15394	NCAM2	M458
O15118	NPC1	M1001
O15118	NPC1	H1042
O15118	NPC1	M1039
Q14108	SCRB2	I336
Q14108	SCRB2	M337
Q14108	SCRB2	P358
Q14108	SCRB2	T365
Q14108	SCRB2	H357
P05026	AT1B1	M121
Q13740	CD166	M52
Q13740	CD166	M114
Q15165	PON2	M87
Q5ZPR3	CD276	M27
Q9NX62	IMPA3	M117
Q15904	VAS1	M190
Q11201	SIA4A	M42
Q11201	SIA4A	Y156
P06756	ITAV	M563
P54802	ANAG	M38
Q8WVQ1	CANT1	M375
P15586	GNS	M509
Q68CR1	SE1L3	M793
P43307	SSRA	P163

## Sheet: AAL
Protein Code	Protein Name	Oxidation Position
Q9HDC9	APMAP	T277
Q9HDC9	APMAP	V111
Q9HDC9	APMAP	M355
Q9HDC9	APMAP	M290
Q12797	ASPH	M605
P05026	AT1B1	M121
P54709	AT1B3	M82
P54709	AT1B3	P79
P54709	AT1B3	L81
P54709	AT1B3	P147
P54709	AT1B3	F162
P54709	AT1B3	L151
P54709	AT1B3	I210
P54709	AT1B3	M209
P54709	AT1B3	V83
P35613	BASI	M292
P35613	BASI	M239
Q8WVQ1	CANT1	M375
O75976	CBPD	M1207
Q13740	CD166	M216
Q13740	CD166	M114
Q13740	CD166	M52
Q5ZPR3	CD276	P363
P48960	CD97	M338
Q96KA5	CLP1L	M378
Q96KA5	CLP1L	M179
P30825	CTR1	M13
Q14126	DSG2	M740
Q14126	DSG2	M757
Q14126	DSG2	M1035
Q14126	DSG2	T945
Q14126	DSG2	T942
Q14126	DSG2	P927
Q14126	DSG2	V1014
Q8N766	EMC1	M598
Q8N766	EMC1	M336
P14625	ENPL	V152
P14625	ENPL	M154
P14625	ENPL	T155
P14625	ENPL	M426
P16422	EPCAM	L233
O75477	ERLN1	M159
O75477	ERLN1	V92
O75477	ERLN1	P302
Q7Z2K6	ERMP1	M800
Q04609	FOLH1	M569
Q04609	FOLH1	M583
Q04609	FOLH1	M509
Q04609	FOLH1	M344
Q04609	FOLH1	M663
Q10472	GALT1	H146
Q92896	GSLG1	M200
Q92896	GSLG1	M403
Q9Y4L1	HYOU1	M88
Q9Y4L1	HYOU1	M417
Q9Y4L1	HYOU1	M275
Q9Y4L1	HYOU1	M56
P23229	ITA6	M1014
P06756	ITAV	M563
P05556	ITB1	M512
P05556	ITB1	M170
P05556	ITB1	M173
P11047	LAMC1	T1061
P10253	LYAG	M695
Q5JRA6	MIA3	M784
Q5JRA6	MIA3	T782
Q5JRA6	MIA3	M955
P20645	MPRD	M142
P11717	MPRI	M852
P11717	MPRI	M1550
P11717	MPRI	M704
P11717	MPRI	P1700
O15394	NCAM2	M458
O15394	NCAM2	M393
P08473	NEP	M461
P08473	NEP	M377
P08473	NEP	M73
P08473	NEP	M273
P08473	NEP	M297
P08473	NEP	Y575
P08473	NEP	I578
Q5JPE7	NOMO2	V493
Q5JPE7	NOMO2	F258
Q5JPE7	NOMO2	P777
Q5JPE7	NOMO2	M327
Q5JPE7	NOMO2	M677
O15118	NPC1	M1001
O15118	NPC1	M996
O15118	NPC1	H1042
O15118	NPC1	Y1041
Q02809	PLOD1	M623
Q02809	PLOD1	M494
Q8TEM1	PO210	M1647
Q8TEM1	PO210	M196
Q8TEM1	PO210	M1241
Q8TEM1	PO210	M1300
Q8TEM1	PO210	P756
Q8TEM1	PO210	M211
Q8TEM1	PO210	M1185
Q8TEM1	PO210	M538
Q8TEM1	PO210	M1017
P50897	PPT1	L136
P50897	PPT1	M112
P10586	PTPRF	M1674
P10586	PTPRF	M1590
O00391	QSOX1	M301
P04844	RPN2	M237
P04844	RPN2	L218
P04844	RPN2	M620
P04844	RPN2	M337
Q9Y666	S12A7	M774
Q9Y666	S12A7	M897
Q9Y666	S12A7	M891
Q9Y666	S12A7	M1055
Q9Y666	S12A7	M1041
Q9Y6M7	S4A7	M492
Q14108	SCRB2	H357
Q14108	SCRB2	I336
Q14108	SCRB2	M337
Q9UBV2	SE1L1	M413
Q68CR1	SE1L3	M793
Q11201	SIA4A	M42
P43307	SSRA	P163
P46977	STT3A	M150
P46977	STT3A	M639
P46977	STT3A	M559
Q8TCJ2	STT3B	Y718
P02786	TFR1	M432
P02786	TFR1	M436
P02786	TFR1	M283
Q7Z7H5	TMED4	H78
Q7Z7H5	TMED4	M77
Q9BVK6	TMED9	T58
Q9BVK6	TMED9	M59
Q9BVK6	TMED9	M85
Q9BVK6	TMED9	L83
Q9BVK6	TMED9	M136
Q9P0T7	TMEM9	M138
Q96JJ7	TMX3	F237
Q96JJ7	TMX3	M234
Q96JJ7	TMX3	L232
Q96JJ7	TMX3	M82
Q96JJ7	TMX3	M332
Q15904	VAS1	M190
