# Supplementary material for: Determination of the glycoprotein specificity of lectins on cell membranes through oxidative proteomics
Source: Chem Sci. 2020 Aug 17;11(35):9501–12. doi: 10.1039/d0sc04199h (PMC8162070; doi:10.1039/d0sc04199h)
Supplement: SC-011-D0SC04199H-s007 [file SC-011-D0SC04199H-s007.xlsx]

## Sheet: Sheet 1
Oxidizied Nonglycosylated Proteins (LNCaP Cells)
WGA	SNA	AAL
O75915	O75915	O75915
Q9HBL7	Q9HBL7	Q9HBL7
Q9UJZ1	Q9UJZ1	Q9UJZ1
O00186	P08865	O00186
P61586	P61586	P08865
O95716	O95716	P61586
P11233	P51153	P11233
P51153	P51148	P51153
P51148	P63000	P51148
P63000	O00161	P63000
O00161	P54920	P54920
Q9NQC3	Q15019	Q14BN4
P20339	O43865	Q15019
P20336	Q9NQC3	O43865
Q15286	P20339	Q9NQC3
Q9NP72	Q15286	P20339
P61020	Q9NP72	Q15286
P35222	P61020	Q9NP72
P15924	P35222	P61020
O75955	P15924	P35222
Q14254	P58107	Q9H223
O14735	P53618	P15924
Q9BV40	O75955	P58107
Q9P0L0	Q14254	P53618
P21796	O14735	O75955
Q13445	Q9P0L0	O14735
O95210	Q96GC9	Q9BV40
Q8NFT2	P21796	Q9P0L0
O95782	Q13445	Q96GC9
P25705	Q9H2K8	P21796
Q07065	Q8NFT2	Q13445
P20020	O95782	O95210
P23634	P25705	P84077
Q9NX76	Q07065	O95782
O94973	P23634	Q06481
Q96CW1	P20648	P25705
P63010	O94973	Q07065
Q9NP58	P00505	P20020
P30153	Q96CW1	P23634
Q99653	P63010	O94973
P05023	Q9NP58	Q96CW1
P68104	P30153	Q12955
Q9BSJ8	P05023	P63010
A0FGR8	Q96EY1	Q9NP58
Q9UM54	P68104	P30153
O00159	Q9BSJ8	Q96CP6
P07237	A0FGR8	P05023
P08238	Q5JWF2	Q96EY1
P11142	Q9Y2A7	P68104
O75131	Q9UM54	Q9BSJ8
P35221	O00159	A0FGR8
Q6IAA8	P07237	P15311
P07900	Q13492	Q5JWF2
Q14980	P08238	Q8N3R9
Q9BRV3	P11142	Q9Y2A7
O15121	P04632	Q9UM54
O15258	O75131	O00159
O15260	P35221	P07237
O43752	O60716	Q6PHW0
O75251	Q6IAA8	P08238
O75787	P46940	P11142
P04406	P50570	P04632
P05141	P07900	O75131
P05787		P35221
P06576		O60716
P07099		Q6IAA8
P07814		P46940
P10620		P04264
P10809		P50570
P11021		P50851
P13010		P07900
P13639		Q14980
P13645		Q9BRV3
P14923		O15121
P16615		O15258
P18031		O15260
P20338		O43752
P20340		O75251
P27824		O75787
P28331		P04406
P30519		P05141
P33121		P05787
P35579		P06576
P48047		P07099
P49327		P07814
P49368		P10620
P51149		P10809
P51572		P11021
P51809		P13010
P52597		P13639
P60709		P13645
P61106		P14923
P62873		P16615
P62879		P18031
P63261		P20338
Q00325		P20340
Q00610		P27824
Q02127		P28331
Q02978		P30519
Q15067		P33121
Q15149		P35579
Q16850		P48047
Q5T9A4		P49327
Q86UE4		P49368
Q93050		P51149
Q96S97		P51572
Q99714		P51809
Q99805		P52597
Q9BTX1		P60709
Q9H307		P61106
Q9H9J2		P62873
Q9NTJ5		P62879
Q9NUT2		P63261
Q9UHQ9		Q00325
Q9UJS0		Q00610
Q9Y446		Q02127
		Q02978
		Q15067
		Q15149
		Q16850
		Q5T9A4
		Q86UE4
		Q93050
		Q96S97
		Q99714
		Q99805
		Q9BTX1
		Q9H307
		Q9H9J2
		Q9NTJ5
		Q9NUT2
		Q9UHQ9
		Q9UJS0
		Q9Y446
