# Supplementary material for: Determination of the glycoprotein specificity of lectins on cell membranes through oxidative proteomics
Source: Chem Sci. 2020 Aug 17;11(35):9501–12. doi: 10.1039/d0sc04199h (PMC8162070; doi:10.1039/d0sc04199h)
Supplement: SC-011-D0SC04199H-s008 [file SC-011-D0SC04199H-s008.xlsx]

## Sheet: Sheet1
LNCaP cell Glycoproteomics
UniProt ID	N-glycosites	Glycans	Glycan Code	Glycan Subtype
O00115	N212	Hex(6)HexNAc(2)Fuc(0)NeuAc(0)	6_2_0_0	High mannose
O00391	N130	Hex(8)HexNAc(2)Fuc(0)NeuAc(0)	8_2_0_0	High mannose
O00481	N115	Hex(8)HexNAc(2)Fuc(0)NeuAc(0)	8_2_0_0	High mannose
O00481	N115	Hex(9)HexNAc(2)Fuc(0)NeuAc(0)	9_2_0_0	High mannose
O00592	N360	Hex(5)HexNAc(4)Fuc(1)NeuAc(0)	5_4_1_0	Complex-Fucosylated
O00592	N360	Hex(5)HexNAc(4)Fuc(2)NeuAc(0)	5_4_2_0	Complex-Fucosylated
O14494	N142	Hex(9)HexNAc(2)Fuc(0)NeuAc(0)	9_2_0_0	High mannose
O14656	N158	Hex(9)HexNAc(2)Fuc(0)NeuAc(0)	9_2_0_0	High mannose
O14672	N267	Hex(9)HexNAc(2)Fuc(0)NeuAc(0)	9_2_0_0	High mannose
O14672	N278	Hex(8)HexNAc(2)Fuc(0)NeuAc(0)	8_2_0_0	High mannose
O14672	N278	Hex(9)HexNAc(2)Fuc(0)NeuAc(0)	9_2_0_0	High mannose
O14672	N439	Hex(6)HexNAc(6)Fuc(2)NeuAc(1)	6_6_2_1	Complex-Sialofucosylated
O14672	N439	Hex(10)HexNAc(2)Fuc(0)NeuAc(0)	10_2_0_0	High mannose
O14672	N439	Hex(7)HexNAc(2)Fuc(0)NeuAc(0)	7_2_0_0	High mannose
O14672	N439	Hex(8)HexNAc(2)Fuc(0)NeuAc(0)	8_2_0_0	High mannose
O14672	N439	Hex(9)HexNAc(2)Fuc(0)NeuAc(0)	9_2_0_0	High mannose
O14672	N551	Hex(5)HexNAc(4)Fuc(1)NeuAc(0)	5_4_1_0	Complex-Fucosylated
O14672	N551	Hex(8)HexNAc(2)Fuc(0)NeuAc(0)	8_2_0_0	High mannose
O14786	N150	Hex(10)HexNAc(2)Fuc(0)NeuAc(0)	10_2_0_0	High mannose
O14786	N150	Hex(9)HexNAc(2)Fuc(0)NeuAc(0)	9_2_0_0	High mannose
O14786	N150	Hex(5)HexNAc(3)Fuc(1)NeuAc(0)	5_3_1_0	Hybrid-Fucosylated
O15031	N1002	Hex(8)HexNAc(2)Fuc(0)NeuAc(0)	8_2_0_0	High mannose
O15031	N1002	Hex(9)HexNAc(2)Fuc(0)NeuAc(0)	9_2_0_0	High mannose
O15031	N1099	Hex(5)HexNAc(4)Fuc(2)NeuAc(0)	5_4_2_0	Complex-Fucosylated
O15031	N1099	Hex(9)HexNAc(2)Fuc(0)NeuAc(0)	9_2_0_0	High mannose
O15031	N1099	Hex(5)HexNAc(3)Fuc(2)NeuAc(0)	5_3_2_0	Hybrid-Fucosylated
O15031	N1099	Hex(6)HexNAc(3)Fuc(1)NeuAc(0)	6_3_1_0	Hybrid-Fucosylated
O15031	N528	Hex(5)HexNAc(4)Fuc(0)NeuAc(0)	5_4_0_0	Complex/Hybrid
O15031	N528	Hex(6)HexNAc(2)Fuc(0)NeuAc(0)	6_2_0_0	High mannose
O15031	N528	Hex(9)HexNAc(2)Fuc(0)NeuAc(0)	9_2_0_0	High mannose
O15031	N528	Hex(6)HexNAc(3)Fuc(0)NeuAc(0)	6_3_0_0	Hybrid
O15031	N733	Hex(9)HexNAc(2)Fuc(0)NeuAc(0)	9_2_0_0	High mannose
O15031	N759	Hex(10)HexNAc(2)Fuc(0)NeuAc(0)	10_2_0_0	High mannose
O15031	N759	Hex(9)HexNAc(2)Fuc(0)NeuAc(0)	9_2_0_0	High mannose
O15031	N795	Hex(3)HexNAc(4)Fuc(3)NeuAc(0)	3_4_3_0	Complex-Fucosylated
O15031	N795	Hex(6)HexNAc(5)Fuc(1)NeuAc(0)	6_5_1_0	Complex-Fucosylated
O15031	N795	Hex(6)HexNAc(5)Fuc(2)NeuAc(0)	6_5_2_0	Complex-Fucosylated
O15031	N795	Hex(6)HexNAc(5)Fuc(3)NeuAc(0)	6_5_3_0	Complex-Fucosylated
O15031	N795	Hex(8)HexNAc(2)Fuc(0)NeuAc(0)	8_2_0_0	High mannose
O15031	N795	Hex(9)HexNAc(2)Fuc(0)NeuAc(0)	9_2_0_0	High mannose
O15031	N795	Hex(7)HexNAc(5)Fuc(2)NeuAc(0)	7_5_2_0	Hybrid-Fucosylated
O15118	N135	Hex(4)HexNAc(4)Fuc(0)NeuAc(0)	4_4_0_0	Complex/Hybrid
O15118	N185	Hex(6)HexNAc(5)Fuc(1)NeuAc(0)	6_5_1_0	Complex-Fucosylated
O15118	N185	Hex(5)HexNAc(4)Fuc(3)NeuAc(1)	5_4_3_1	Complex-Sialofucosylated
O15118	N185	Hex(6)HexNAc(5)Fuc(0)NeuAc(1)	6_5_0_1	Complex/Hybrid-Sialylated
O15118	N598	Hex(6)HexNAc(5)Fuc(1)NeuAc(0)	6_5_1_0	Complex-Fucosylated
O15118	N598	Hex(7)HexNAc(6)Fuc(0)NeuAc(1)	7_6_0_1	Complex-Sialylated
O15118	N598	Hex(8)HexNAc(2)Fuc(0)NeuAc(0)	8_2_0_0	High mannose
O15118	N598	Hex(9)HexNAc(2)Fuc(0)NeuAc(0)	9_2_0_0	High mannose
O15230	N1330	Hex(9)HexNAc(2)Fuc(0)NeuAc(0)	9_2_0_0	High mannose
O15230	N2423	Hex(9)HexNAc(2)Fuc(0)NeuAc(0)	9_2_0_0	High mannose
O15230	N95	Hex(8)HexNAc(2)Fuc(0)NeuAc(0)	8_2_0_0	High mannose
O15393	N213	Hex(5)HexNAc(4)Fuc(1)NeuAc(0)	5_4_1_0	Complex-Fucosylated
O15393	N213	Hex(5)HexNAc(4)Fuc(2)NeuAc(0)	5_4_2_0	Complex-Fucosylated
O15393	N213	Hex(5)HexNAc(4)Fuc(3)NeuAc(0)	5_4_3_0	Complex-Fucosylated
O15393	N213	Hex(5)HexNAc(4)Fuc(1)NeuAc(1)	5_4_1_1	Complex-Sialofucosylated
O15393	N213	Hex(10)HexNAc(2)Fuc(0)NeuAc(0)	10_2_0_0	High mannose
O15393	N213	Hex(8)HexNAc(2)Fuc(0)NeuAc(0)	8_2_0_0	High mannose
O15393	N213	Hex(9)HexNAc(2)Fuc(0)NeuAc(0)	9_2_0_0	High mannose
O15393	N249	Hex(4)HexNAc(4)Fuc(2)NeuAc(1)	4_4_2_1	Complex-Sialofucosylated
O15393	N249	Hex(10)HexNAc(2)Fuc(0)NeuAc(0)	10_2_0_0	High mannose
O15393	N249	Hex(9)HexNAc(2)Fuc(0)NeuAc(0)	9_2_0_0	High mannose
O15394	N177	Hex(4)HexNAc(5)Fuc(1)NeuAc(0)	4_5_1_0	Complex-Fucosylated
O15394	N177	Hex(5)HexNAc(4)Fuc(1)NeuAc(0)	5_4_1_0	Complex-Fucosylated
O15394	N445	Hex(6)HexNAc(5)Fuc(1)NeuAc(0)	6_5_1_0	Complex-Fucosylated
O15394	N445	Hex(6)HexNAc(5)Fuc(2)NeuAc(0)	6_5_2_0	Complex-Fucosylated
O15394	N445	Hex(7)HexNAc(6)Fuc(1)NeuAc(0)	7_6_1_0	Complex-Fucosylated
O15394	N445	Hex(9)HexNAc(2)Fuc(0)NeuAc(0)	9_2_0_0	High mannose
O15394	N474	Hex(7)HexNAc(6)Fuc(1)NeuAc(0)	7_6_1_0	Complex-Fucosylated
O15394	N474	Hex(5)HexNAc(4)Fuc(0)NeuAc(0)	5_4_0_0	Complex/Hybrid
O15394	N474	Hex(5)HexNAc(2)Fuc(0)NeuAc(0)	5_2_0_0	High mannose
O15394	N474	Hex(6)HexNAc(2)Fuc(0)NeuAc(0)	6_2_0_0	High mannose
O15394	N474	Hex(8)HexNAc(2)Fuc(0)NeuAc(0)	8_2_0_0	High mannose
O15394	N474	Hex(9)HexNAc(2)Fuc(0)NeuAc(0)	9_2_0_0	High mannose
O15394	N474	Hex(6)HexNAc(3)Fuc(0)NeuAc(0)	6_3_0_0	Hybrid
O15394	N562	Hex(6)HexNAc(5)Fuc(4)NeuAc(0)	6_5_4_0	Complex-Fucosylated
O15394	N562	Hex(7)HexNAc(6)Fuc(4)NeuAc(0)	7_6_4_0	Complex-Fucosylated
O15394	N562	Hex(6)HexNAc(5)Fuc(1)NeuAc(1)	6_5_1_1	Complex-Sialofucosylated
O43291	N94	Hex(8)HexNAc(2)Fuc(0)NeuAc(0)	8_2_0_0	High mannose
O60487	N118	Hex(10)HexNAc(2)Fuc(0)NeuAc(0)	10_2_0_0	High mannose
O60487	N118	Hex(7)HexNAc(2)Fuc(0)NeuAc(0)	7_2_0_0	High mannose
O60487	N118	Hex(8)HexNAc(2)Fuc(0)NeuAc(0)	8_2_0_0	High mannose
O60487	N118	Hex(9)HexNAc(2)Fuc(0)NeuAc(0)	9_2_0_0	High mannose
O60487	N39	Hex(4)HexNAc(4)Fuc(2)NeuAc(1)	4_4_2_1	Complex-Sialofucosylated
O60487	N39	Hex(10)HexNAc(2)Fuc(0)NeuAc(0)	10_2_0_0	High mannose
O60635	N154	Hex(4)HexNAc(6)Fuc(0)NeuAc(0)	4_6_0_0	Complex
O60635	N154	Hex(7)HexNAc(2)Fuc(0)NeuAc(0)	7_2_0_0	High mannose
O60635	N154	Hex(8)HexNAc(2)Fuc(0)NeuAc(0)	8_2_0_0	High mannose
O60637	N127	Hex(10)HexNAc(2)Fuc(0)NeuAc(0)	10_2_0_0	High mannose
O60637	N127	Hex(9)HexNAc(2)Fuc(0)NeuAc(0)	9_2_0_0	High mannose
O60637	N167	Hex(6)HexNAc(2)Fuc(0)NeuAc(0)	6_2_0_0	High mannose
O60637	N167	Hex(7)HexNAc(2)Fuc(0)NeuAc(0)	7_2_0_0	High mannose
O60637	N167	Hex(8)HexNAc(2)Fuc(0)NeuAc(0)	8_2_0_0	High mannose
O60637	N167	Hex(9)HexNAc(2)Fuc(0)NeuAc(0)	9_2_0_0	High mannose
O60637	N167	Hex(5)HexNAc(3)Fuc(1)NeuAc(0)	5_3_1_0	Hybrid-Fucosylated
O60637	N167	Hex(6)HexNAc(3)Fuc(1)NeuAc(0)	6_3_1_0	Hybrid-Fucosylated
O75477	N106	Hex(8)HexNAc(2)Fuc(0)NeuAc(0)	8_2_0_0	High mannose
O75477	N106	Hex(9)HexNAc(2)Fuc(0)NeuAc(0)	9_2_0_0	High mannose
O75503	N203	Hex(9)HexNAc(2)Fuc(0)NeuAc(0)	9_2_0_0	High mannose
O75718	N87	Hex(6)HexNAc(2)Fuc(0)NeuAc(0)	6_2_0_0	High mannose
O75718	N87	Hex(8)HexNAc(2)Fuc(0)NeuAc(0)	8_2_0_0	High mannose
O75718	N87	Hex(9)HexNAc(2)Fuc(0)NeuAc(0)	9_2_0_0	High mannose
O75882	N1082	Hex(9)HexNAc(2)Fuc(0)NeuAc(0)	9_2_0_0	High mannose
O75882	N264	Hex(9)HexNAc(2)Fuc(0)NeuAc(0)	9_2_0_0	High mannose
O75882	N383	Hex(9)HexNAc(2)Fuc(0)NeuAc(0)	9_2_0_0	High mannose
O75882	N731	Hex(9)HexNAc(2)Fuc(0)NeuAc(0)	9_2_0_0	High mannose
O75976	N1070	Hex(5)HexNAc(4)Fuc(1)NeuAc(0)	5_4_1_0	Complex-Fucosylated
O75976	N1070	Hex(5)HexNAc(4)Fuc(2)NeuAc(0)	5_4_2_0	Complex-Fucosylated
O75976	N1070	Hex(5)HexNAc(4)Fuc(3)NeuAc(0)	5_4_3_0	Complex-Fucosylated
O75976	N1070	Hex(10)HexNAc(2)Fuc(0)NeuAc(0)	10_2_0_0	High mannose
O75976	N1070	Hex(8)HexNAc(2)Fuc(0)NeuAc(0)	8_2_0_0	High mannose
O75976	N1070	Hex(9)HexNAc(2)Fuc(0)NeuAc(0)	9_2_0_0	High mannose
O75976	N172	Hex(10)HexNAc(2)Fuc(0)NeuAc(0)	10_2_0_0	High mannose
O75976	N522	Hex(6)HexNAc(5)Fuc(2)NeuAc(0)	6_5_2_0	Complex-Fucosylated
O75976	N626	Hex(10)HexNAc(2)Fuc(0)NeuAc(0)	10_2_0_0	High mannose
O75976	N626	Hex(9)HexNAc(2)Fuc(0)NeuAc(0)	9_2_0_0	High mannose
O75976	N626	Hex(6)HexNAc(3)Fuc(2)NeuAc(0)	6_3_2_0	Hybrid-Fucosylated
O75976	N855	Hex(5)HexNAc(4)Fuc(1)NeuAc(0)	5_4_1_0	Complex-Fucosylated
O75976	N855	Hex(6)HexNAc(5)Fuc(1)NeuAc(0)	6_5_1_0	Complex-Fucosylated
O75976	N978	Hex(5)HexNAc(4)Fuc(1)NeuAc(0)	5_4_1_0	Complex-Fucosylated
O75976	N978	Hex(6)HexNAc(5)Fuc(3)NeuAc(0)	6_5_3_0	Complex-Fucosylated
O75976	N978	Hex(9)HexNAc(2)Fuc(0)NeuAc(0)	9_2_0_0	High mannose
O76024	N746	Hex(5)HexNAc(7)Fuc(5)NeuAc(0)	5_7_5_0	Complex-Fucosylated
O76024	N746	Hex(6)HexNAc(2)Fuc(0)NeuAc(0)	6_2_0_0	High mannose
O76024	N746	Hex(7)HexNAc(2)Fuc(0)NeuAc(0)	7_2_0_0	High mannose
O76024	N746	Hex(8)HexNAc(2)Fuc(0)NeuAc(0)	8_2_0_0	High mannose
O94898	N589	Hex(9)HexNAc(2)Fuc(0)NeuAc(0)	9_2_0_0	High mannose
O95297	N50	Hex(10)HexNAc(2)Fuc(0)NeuAc(0)	10_2_0_0	High mannose
O95297	N50	Hex(8)HexNAc(2)Fuc(0)NeuAc(0)	8_2_0_0	High mannose
O95297	N50	Hex(9)HexNAc(2)Fuc(0)NeuAc(0)	9_2_0_0	High mannose
O95427	N128	Hex(9)HexNAc(2)Fuc(0)NeuAc(0)	9_2_0_0	High mannose
P00533	N352	Hex(8)HexNAc(2)Fuc(0)NeuAc(0)	8_2_0_0	High mannose
P00533	N361	Hex(9)HexNAc(2)Fuc(0)NeuAc(0)	9_2_0_0	High mannose
P01889	N110	Hex(9)HexNAc(2)Fuc(0)NeuAc(0)	9_2_0_0	High mannose
P01892	N110	Hex(5)HexNAc(4)Fuc(2)NeuAc(0)	5_4_2_0	Complex-Fucosylated
P01892	N110	Hex(9)HexNAc(2)Fuc(0)NeuAc(0)	9_2_0_0	High mannose
P02751	N1007	Hex(4)HexNAc(5)Fuc(1)NeuAc(0)	4_5_1_0	Complex-Fucosylated
P02751	N1007	Hex(5)HexNAc(4)Fuc(1)NeuAc(0)	5_4_1_0	Complex-Fucosylated
P02751	N1007	Hex(9)HexNAc(2)Fuc(0)NeuAc(0)	9_2_0_0	High mannose
P02786	N251	Hex(5)HexNAc(4)Fuc(1)NeuAc(0)	5_4_1_0	Complex-Fucosylated
P02786	N251	Hex(6)HexNAc(5)Fuc(1)NeuAc(0)	6_5_1_0	Complex-Fucosylated
P02786	N251	Hex(6)HexNAc(5)Fuc(2)NeuAc(0)	6_5_2_0	Complex-Fucosylated
P02786	N251	Hex(6)HexNAc(5)Fuc(3)NeuAc(0)	6_5_3_0	Complex-Fucosylated
P02786	N251	Hex(7)HexNAc(6)Fuc(1)NeuAc(0)	7_6_1_0	Complex-Fucosylated
P02786	N251	Hex(7)HexNAc(6)Fuc(2)NeuAc(0)	7_6_2_0	Complex-Fucosylated
P02786	N251	Hex(9)HexNAc(2)Fuc(0)NeuAc(0)	9_2_0_0	High mannose
P02786	N727	Hex(3)HexNAc(4)Fuc(3)NeuAc(0)	3_4_3_0	Complex-Fucosylated
P02786	N727	Hex(4)HexNAc(4)Fuc(3)NeuAc(0)	4_4_3_0	Complex-Fucosylated
P02786	N727	Hex(8)HexNAc(2)Fuc(0)NeuAc(0)	8_2_0_0	High mannose
P02786	N727	Hex(9)HexNAc(2)Fuc(0)NeuAc(0)	9_2_0_0	High mannose
P04035	N281	Hex(8)HexNAc(2)Fuc(0)NeuAc(0)	8_2_0_0	High mannose
P04062	N309	Hex(10)HexNAc(2)Fuc(0)NeuAc(0)	10_2_0_0	High mannose
P04626	N187	Hex(9)HexNAc(2)Fuc(0)NeuAc(0)	9_2_0_0	High mannose
P04626	N530	Hex(5)HexNAc(4)Fuc(1)NeuAc(0)	5_4_1_0	Complex-Fucosylated
P04844	N106	Hex(3)HexNAc(4)Fuc(3)NeuAc(0)	3_4_3_0	Complex-Fucosylated
P05026	N158	Hex(7)HexNAc(6)Fuc(3)NeuAc(1)	7_6_3_1	Complex-Sialofucosylated
P05026	N158	Hex(9)HexNAc(2)Fuc(0)NeuAc(0)	9_2_0_0	High mannose
P05556	N212	Hex(7)HexNAc(6)Fuc(1)NeuAc(0)	7_6_1_0	Complex-Fucosylated
P05556	N212	Hex(7)HexNAc(6)Fuc(2)NeuAc(0)	7_6_2_0	Complex-Fucosylated
P05556	N212	Hex(4)HexNAc(4)Fuc(2)NeuAc(1)	4_4_2_1	Complex-Sialofucosylated
P05556	N212	Hex(10)HexNAc(2)Fuc(0)NeuAc(0)	10_2_0_0	High mannose
P05556	N212	Hex(6)HexNAc(2)Fuc(0)NeuAc(0)	6_2_0_0	High mannose
P05556	N212	Hex(7)HexNAc(2)Fuc(0)NeuAc(0)	7_2_0_0	High mannose
P05556	N212	Hex(8)HexNAc(2)Fuc(0)NeuAc(0)	8_2_0_0	High mannose
P05556	N212	Hex(9)HexNAc(2)Fuc(0)NeuAc(0)	9_2_0_0	High mannose
P05556	N406	Hex(8)HexNAc(2)Fuc(0)NeuAc(0)	8_2_0_0	High mannose
P05556	N406	Hex(9)HexNAc(2)Fuc(0)NeuAc(0)	9_2_0_0	High mannose
P05556	N481	Hex(7)HexNAc(6)Fuc(1)NeuAc(0)	7_6_1_0	Complex-Fucosylated
P05556	N481	Hex(6)HexNAc(2)Fuc(0)NeuAc(0)	6_2_0_0	High mannose
P05556	N481	Hex(7)HexNAc(2)Fuc(0)NeuAc(0)	7_2_0_0	High mannose
P05556	N481	Hex(8)HexNAc(2)Fuc(0)NeuAc(0)	8_2_0_0	High mannose
P05556	N481	Hex(9)HexNAc(2)Fuc(0)NeuAc(0)	9_2_0_0	High mannose
P05556	N50	Hex(3)HexNAc(4)Fuc(3)NeuAc(0)	3_4_3_0	Complex-Fucosylated
P05556	N50	Hex(4)HexNAc(4)Fuc(3)NeuAc(0)	4_4_3_0	Complex-Fucosylated
P05556	N50	Hex(6)HexNAc(2)Fuc(0)NeuAc(0)	6_2_0_0	High mannose
P05556	N50	Hex(7)HexNAc(2)Fuc(0)NeuAc(0)	7_2_0_0	High mannose
P05556	N50	Hex(8)HexNAc(2)Fuc(0)NeuAc(0)	8_2_0_0	High mannose
P05556	N50	Hex(9)HexNAc(2)Fuc(0)NeuAc(0)	9_2_0_0	High mannose
P05556	N520	Hex(3)HexNAc(6)Fuc(0)NeuAc(0)	3_6_0_0	Complex
P05556	N520	Hex(4)HexNAc(6)Fuc(0)NeuAc(0)	4_6_0_0	Complex
P05556	N520	Hex(4)HexNAc(4)Fuc(3)NeuAc(0)	4_4_3_0	Complex-Fucosylated
P05556	N520	Hex(6)HexNAc(2)Fuc(0)NeuAc(0)	6_2_0_0	High mannose
P05556	N520	Hex(7)HexNAc(2)Fuc(0)NeuAc(0)	7_2_0_0	High mannose
P05556	N520	Hex(8)HexNAc(2)Fuc(0)NeuAc(0)	8_2_0_0	High mannose
P05556	N520	Hex(9)HexNAc(2)Fuc(0)NeuAc(0)	9_2_0_0	High mannose
P05556	N584	Hex(3)HexNAc(7)Fuc(0)NeuAc(0)	3_7_0_0	Complex
P05556	N584	Hex(3)HexNAc(5)Fuc(4)NeuAc(0)	3_5_4_0	Complex-Fucosylated
P05556	N669	Hex(6)HexNAc(2)Fuc(0)NeuAc(0)	6_2_0_0	High mannose
P05556	N669	Hex(7)HexNAc(2)Fuc(0)NeuAc(0)	7_2_0_0	High mannose
P05556	N669	Hex(8)HexNAc(2)Fuc(0)NeuAc(0)	8_2_0_0	High mannose
P05556	N669	Hex(9)HexNAc(2)Fuc(0)NeuAc(0)	9_2_0_0	High mannose
P05981	N112	Hex(10)HexNAc(2)Fuc(0)NeuAc(0)	10_2_0_0	High mannose
P05981	N112	Hex(8)HexNAc(2)Fuc(0)NeuAc(0)	8_2_0_0	High mannose
P05981	N112	Hex(5)HexNAc(3)Fuc(1)NeuAc(0)	5_3_1_0	Hybrid-Fucosylated
P05981	N112	Hex(6)HexNAc(3)Fuc(1)NeuAc(0)	6_3_1_0	Hybrid-Fucosylated
P06213	N242	Hex(6)HexNAc(2)Fuc(0)NeuAc(0)	6_2_0_0	High mannose
P06213	N242	Hex(7)HexNAc(2)Fuc(0)NeuAc(0)	7_2_0_0	High mannose
P06213	N242	Hex(8)HexNAc(2)Fuc(0)NeuAc(0)	8_2_0_0	High mannose
P06213	N242	Hex(9)HexNAc(2)Fuc(0)NeuAc(0)	9_2_0_0	High mannose
P06213	N445	Hex(7)HexNAc(6)Fuc(1)NeuAc(0)	7_6_1_0	Complex-Fucosylated
P06213	N541	Hex(3)HexNAc(6)Fuc(0)NeuAc(0)	3_6_0_0	Complex
P06756	N615	Hex(4)HexNAc(4)Fuc(3)NeuAc(0)	4_4_3_0	Complex-Fucosylated
P06756	N615	Hex(4)HexNAc(4)Fuc(1)NeuAc(1)	4_4_1_1	Complex-Sialofucosylated
P06756	N615	Hex(8)HexNAc(2)Fuc(0)NeuAc(0)	8_2_0_0	High mannose
P06756	N615	Hex(9)HexNAc(2)Fuc(0)NeuAc(0)	9_2_0_0	High mannose
P06756	N74	Hex(5)HexNAc(4)Fuc(1)NeuAc(0)	5_4_1_0	Complex-Fucosylated
P06756	N74	Hex(5)HexNAc(6)Fuc(4)NeuAc(0)	5_6_4_0	Complex-Fucosylated
P06756	N74	Hex(5)HexNAc(4)Fuc(0)NeuAc(0)	5_4_0_0	Complex/Hybrid
P06756	N74	Hex(10)HexNAc(2)Fuc(0)NeuAc(0)	10_2_0_0	High mannose
P06756	N74	Hex(6)HexNAc(2)Fuc(0)NeuAc(0)	6_2_0_0	High mannose
P06756	N74	Hex(7)HexNAc(2)Fuc(0)NeuAc(0)	7_2_0_0	High mannose
P06756	N74	Hex(8)HexNAc(2)Fuc(0)NeuAc(0)	8_2_0_0	High mannose
P06756	N74	Hex(9)HexNAc(2)Fuc(0)NeuAc(0)	9_2_0_0	High mannose
P06756	N74	Hex(5)HexNAc(3)Fuc(0)NeuAc(0)	5_3_0_0	Hybrid
P06756	N74	Hex(6)HexNAc(3)Fuc(0)NeuAc(0)	6_3_0_0	Hybrid
P06756	N74	Hex(5)HexNAc(3)Fuc(1)NeuAc(0)	5_3_1_0	Hybrid-Fucosylated
P06756	N74	Hex(6)HexNAc(3)Fuc(1)NeuAc(0)	6_3_1_0	Hybrid-Fucosylated
P06756	N874	Hex(7)HexNAc(6)Fuc(2)NeuAc(0)	7_6_2_0	Complex-Fucosylated
P06756	N874	Hex(7)HexNAc(6)Fuc(0)NeuAc(1)	7_6_0_1	Complex-Sialylated
P06756	N874	Hex(6)HexNAc(2)Fuc(0)NeuAc(0)	6_2_0_0	High mannose
P06756	N874	Hex(8)HexNAc(2)Fuc(0)NeuAc(0)	8_2_0_0	High mannose
P06756	N945	Hex(9)HexNAc(2)Fuc(0)NeuAc(0)	9_2_0_0	High mannose
P06865	N157	Hex(8)HexNAc(2)Fuc(0)NeuAc(0)	8_2_0_0	High mannose
P07602	N101	Hex(8)HexNAc(2)Fuc(0)NeuAc(0)	8_2_0_0	High mannose
P07602	N215	Hex(8)HexNAc(2)Fuc(0)NeuAc(0)	8_2_0_0	High mannose
P07602	N215	Hex(9)HexNAc(2)Fuc(0)NeuAc(0)	9_2_0_0	High mannose
P07602	N80	Hex(9)HexNAc(2)Fuc(0)NeuAc(0)	9_2_0_0	High mannose
P08195	N365	Hex(6)HexNAc(5)Fuc(3)NeuAc(0)	6_5_3_0	Complex-Fucosylated
P08195	N424	Hex(10)HexNAc(2)Fuc(0)NeuAc(0)	10_2_0_0	High mannose
P08195	N424	Hex(8)HexNAc(2)Fuc(0)NeuAc(0)	8_2_0_0	High mannose
P08195	N424	Hex(9)HexNAc(2)Fuc(0)NeuAc(0)	9_2_0_0	High mannose
P08236	N272	Hex(4)HexNAc(4)Fuc(2)NeuAc(1)	4_4_2_1	Complex-Sialofucosylated
P08236	N272	Hex(10)HexNAc(2)Fuc(0)NeuAc(0)	10_2_0_0	High mannose
P08236	N272	Hex(6)HexNAc(2)Fuc(0)NeuAc(0)	6_2_0_0	High mannose
P08236	N272	Hex(8)HexNAc(2)Fuc(0)NeuAc(0)	8_2_0_0	High mannose
P08473	N145	Hex(8)HexNAc(2)Fuc(0)NeuAc(0)	8_2_0_0	High mannose
P08473	N145	Hex(9)HexNAc(2)Fuc(0)NeuAc(0)	9_2_0_0	High mannose
P08473	N285	Hex(7)HexNAc(6)Fuc(0)NeuAc(0)	7_6_0_0	Complex
P08473	N285	Hex(7)HexNAc(6)Fuc(1)NeuAc(0)	7_6_1_0	Complex-Fucosylated
P08473	N285	Hex(7)HexNAc(6)Fuc(2)NeuAc(0)	7_6_2_0	Complex-Fucosylated
P08473	N285	Hex(10)HexNAc(2)Fuc(0)NeuAc(0)	10_2_0_0	High mannose
P08473	N285	Hex(8)HexNAc(2)Fuc(0)NeuAc(0)	8_2_0_0	High mannose
P08473	N285	Hex(9)HexNAc(2)Fuc(0)NeuAc(0)	9_2_0_0	High mannose
P08648	N84	Hex(5)HexNAc(4)Fuc(1)NeuAc(0)	5_4_1_0	Complex-Fucosylated
P08648	N868	Hex(5)HexNAc(4)Fuc(3)NeuAc(0)	5_4_3_0	Complex-Fucosylated
P08648	N868	Hex(9)HexNAc(2)Fuc(0)NeuAc(0)	9_2_0_0	High mannose
P08962	N130	Hex(6)HexNAc(5)Fuc(3)NeuAc(0)	6_5_3_0	Complex-Fucosylated
P08962	N130	Hex(6)HexNAc(5)Fuc(4)NeuAc(0)	6_5_4_0	Complex-Fucosylated
P08962	N130	Hex(10)HexNAc(2)Fuc(0)NeuAc(0)	10_2_0_0	High mannose
P08962	N130	Hex(8)HexNAc(2)Fuc(0)NeuAc(0)	8_2_0_0	High mannose
P08962	N130	Hex(9)HexNAc(2)Fuc(0)NeuAc(0)	9_2_0_0	High mannose
P10253	N140	Hex(6)HexNAc(5)Fuc(0)NeuAc(0)	6_5_0_0	Complex/Hybrid
P10253	N470	Hex(4)HexNAc(4)Fuc(2)NeuAc(1)	4_4_2_1	Complex-Sialofucosylated
P10253	N470	Hex(6)HexNAc(2)Fuc(0)NeuAc(0)	6_2_0_0	High mannose
P10253	N470	Hex(9)HexNAc(2)Fuc(0)NeuAc(0)	9_2_0_0	High mannose
P10253	N470	Hex(6)HexNAc(3)Fuc(2)NeuAc(1)	6_3_2_1	Hybrid-Sialofucosylated
P10253	N882	Hex(9)HexNAc(2)Fuc(0)NeuAc(0)	9_2_0_0	High mannose
P10321	N110	Hex(5)HexNAc(4)Fuc(1)NeuAc(1)	5_4_1_1	Complex-Sialofucosylated
P10321	N110	Hex(10)HexNAc(2)Fuc(0)NeuAc(0)	10_2_0_0	High mannose
P10321	N110	Hex(8)HexNAc(2)Fuc(0)NeuAc(0)	8_2_0_0	High mannose
P10321	N110	Hex(9)HexNAc(2)Fuc(0)NeuAc(0)	9_2_0_0	High mannose
P10586	N966	Hex(5)HexNAc(4)Fuc(2)NeuAc(0)	5_4_2_0	Complex-Fucosylated
P10646	N145	Hex(8)HexNAc(2)Fuc(0)NeuAc(0)	8_2_0_0	High mannose
P10646	N195	Hex(8)HexNAc(2)Fuc(0)NeuAc(0)	8_2_0_0	High mannose
P11047	N1107	Hex(8)HexNAc(2)Fuc(0)NeuAc(0)	8_2_0_0	High mannose
P11047	N1107	Hex(9)HexNAc(2)Fuc(0)NeuAc(0)	9_2_0_0	High mannose
P11047	N1205	Hex(8)HexNAc(2)Fuc(0)NeuAc(0)	8_2_0_0	High mannose
P11047	N1223	Hex(8)HexNAc(2)Fuc(0)NeuAc(0)	8_2_0_0	High mannose
P11047	N1395	Hex(8)HexNAc(2)Fuc(0)NeuAc(0)	8_2_0_0	High mannose
P11117	N167	Hex(8)HexNAc(2)Fuc(0)NeuAc(0)	8_2_0_0	High mannose
P11117	N92	Hex(7)HexNAc(6)Fuc(1)NeuAc(0)	7_6_1_0	Complex-Fucosylated
P11279	N103	Hex(8)HexNAc(2)Fuc(0)NeuAc(0)	8_2_0_0	High mannose
P11279	N249	Hex(4)HexNAc(3)Fuc(1)NeuAc(0)	4_3_1_0	Complex-Fucosylated
P11279	N249	Hex(5)HexNAc(4)Fuc(1)NeuAc(0)	5_4_1_0	Complex-Fucosylated
P11279	N249	Hex(6)HexNAc(5)Fuc(1)NeuAc(0)	6_5_1_0	Complex-Fucosylated
P11279	N261	Hex(5)HexNAc(4)Fuc(1)NeuAc(0)	5_4_1_0	Complex-Fucosylated
P11279	N261	Hex(10)HexNAc(2)Fuc(0)NeuAc(0)	10_2_0_0	High mannose
P11279	N261	Hex(7)HexNAc(2)Fuc(0)NeuAc(0)	7_2_0_0	High mannose
P11279	N261	Hex(9)HexNAc(2)Fuc(0)NeuAc(0)	9_2_0_0	High mannose
P11279	N261	Hex(6)HexNAc(3)Fuc(0)NeuAc(0)	6_3_0_0	Hybrid
P11279	N261	Hex(5)HexNAc(3)Fuc(1)NeuAc(0)	5_3_1_0	Hybrid-Fucosylated
P11279	N84	Hex(4)HexNAc(3)Fuc(1)NeuAc(0)	4_3_1_0	Complex-Fucosylated
P11279	N84	Hex(6)HexNAc(5)Fuc(1)NeuAc(0)	6_5_1_0	Complex-Fucosylated
P11279	N84	Hex(7)HexNAc(6)Fuc(2)NeuAc(0)	7_6_2_0	Complex-Fucosylated
P11279	N84	Hex(7)HexNAc(6)Fuc(3)NeuAc(0)	7_6_3_0	Complex-Fucosylated
P11279	N84	Hex(4)HexNAc(3)Fuc(1)NeuAc(1)	4_3_1_1	Complex-Sialofucosylated
P11279	N84	Hex(7)HexNAc(6)Fuc(0)NeuAc(1)	7_6_0_1	Complex-Sialylated
P11279	N84	Hex(9)HexNAc(2)Fuc(0)NeuAc(0)	9_2_0_0	High mannose
P11717	N112	Hex(4)HexNAc(3)Fuc(1)NeuAc(0)	4_3_1_0	Complex-Fucosylated
P11717	N112	Hex(5)HexNAc(4)Fuc(1)NeuAc(0)	5_4_1_0	Complex-Fucosylated
P11717	N112	Hex(5)HexNAc(5)Fuc(1)NeuAc(0)	5_5_1_0	Complex-Fucosylated
P11717	N112	Hex(6)HexNAc(5)Fuc(3)NeuAc(0)	6_5_3_0	Complex-Fucosylated
P11717	N112	Hex(6)HexNAc(5)Fuc(2)NeuAc(1)	6_5_2_1	Complex-Sialofucosylated
P11717	N112	Hex(8)HexNAc(2)Fuc(0)NeuAc(0)	8_2_0_0	High mannose
P11717	N112	Hex(9)HexNAc(2)Fuc(0)NeuAc(0)	9_2_0_0	High mannose
P11717	N1312	Hex(7)HexNAc(2)Fuc(0)NeuAc(0)	7_2_0_0	High mannose
P11717	N1312	Hex(8)HexNAc(2)Fuc(0)NeuAc(0)	8_2_0_0	High mannose
P11717	N1312	Hex(9)HexNAc(2)Fuc(0)NeuAc(0)	9_2_0_0	High mannose
P11717	N1656	Hex(10)HexNAc(2)Fuc(0)NeuAc(0)	10_2_0_0	High mannose
P11717	N1656	Hex(9)HexNAc(2)Fuc(0)NeuAc(0)	9_2_0_0	High mannose
P11717	N1757	Hex(7)HexNAc(6)Fuc(2)NeuAc(0)	7_6_2_0	Complex-Fucosylated
P11717	N1757	Hex(5)HexNAc(4)Fuc(0)NeuAc(0)	5_4_0_0	Complex/Hybrid
P11717	N1757	Hex(6)HexNAc(5)Fuc(0)NeuAc(1)	6_5_0_1	Complex/Hybrid-Sialylated
P11717	N1757	Hex(10)HexNAc(2)Fuc(0)NeuAc(0)	10_2_0_0	High mannose
P11717	N2136	Hex(6)HexNAc(5)Fuc(1)NeuAc(0)	6_5_1_0	Complex-Fucosylated
P11717	N2136	Hex(6)HexNAc(5)Fuc(2)NeuAc(0)	6_5_2_0	Complex-Fucosylated
P11717	N2136	Hex(6)HexNAc(5)Fuc(4)NeuAc(0)	6_5_4_0	Complex-Fucosylated
P11717	N2136	Hex(7)HexNAc(6)Fuc(1)NeuAc(1)	7_6_1_1	Complex-Sialofucosylated
P11717	N2136	Hex(8)HexNAc(2)Fuc(0)NeuAc(0)	8_2_0_0	High mannose
P11717	N2136	Hex(9)HexNAc(2)Fuc(0)NeuAc(0)	9_2_0_0	High mannose
P11717	N400	Hex(6)HexNAc(2)Fuc(0)NeuAc(0)	6_2_0_0	High mannose
P11717	N400	Hex(9)HexNAc(2)Fuc(0)NeuAc(0)	9_2_0_0	High mannose
P11717	N400	Hex(6)HexNAc(3)Fuc(0)NeuAc(0)	6_3_0_0	Hybrid
P11717	N435	Hex(5)HexNAc(4)Fuc(1)NeuAc(0)	5_4_1_0	Complex-Fucosylated
P11717	N435	Hex(6)HexNAc(5)Fuc(1)NeuAc(0)	6_5_1_0	Complex-Fucosylated
P11717	N435	Hex(6)HexNAc(5)Fuc(2)NeuAc(0)	6_5_2_0	Complex-Fucosylated
P11717	N435	Hex(9)HexNAc(2)Fuc(0)NeuAc(0)	9_2_0_0	High mannose
P11717	N543	Hex(5)HexNAc(4)Fuc(1)NeuAc(0)	5_4_1_0	Complex-Fucosylated
P11717	N543	Hex(6)HexNAc(5)Fuc(1)NeuAc(0)	6_5_1_0	Complex-Fucosylated
P11717	N543	Hex(9)HexNAc(2)Fuc(0)NeuAc(0)	9_2_0_0	High mannose
P11717	N581	Hex(5)HexNAc(4)Fuc(0)NeuAc(0)	5_4_0_0	Complex/Hybrid
P11717	N581	Hex(10)HexNAc(2)Fuc(0)NeuAc(0)	10_2_0_0	High mannose
P11717	N581	Hex(6)HexNAc(2)Fuc(0)NeuAc(0)	6_2_0_0	High mannose
P11717	N581	Hex(7)HexNAc(2)Fuc(0)NeuAc(0)	7_2_0_0	High mannose
P11717	N581	Hex(8)HexNAc(2)Fuc(0)NeuAc(0)	8_2_0_0	High mannose
P11717	N581	Hex(9)HexNAc(2)Fuc(0)NeuAc(0)	9_2_0_0	High mannose
P11717	N581	Hex(6)HexNAc(3)Fuc(0)NeuAc(0)	6_3_0_0	Hybrid
P11717	N626	Hex(6)HexNAc(5)Fuc(2)NeuAc(0)	6_5_2_0	Complex-Fucosylated
P11717	N626	Hex(7)HexNAc(5)Fuc(1)NeuAc(0)	7_5_1_0	Hybrid-Fucosylated
P11717	N747	Hex(4)HexNAc(4)Fuc(2)NeuAc(1)	4_4_2_1	Complex-Sialofucosylated
P11717	N747	Hex(6)HexNAc(5)Fuc(1)NeuAc(1)	6_5_1_1	Complex-Sialofucosylated
P11717	N747	Hex(10)HexNAc(2)Fuc(0)NeuAc(0)	10_2_0_0	High mannose
P11717	N747	Hex(8)HexNAc(2)Fuc(0)NeuAc(0)	8_2_0_0	High mannose
P11717	N747	Hex(9)HexNAc(2)Fuc(0)NeuAc(0)	9_2_0_0	High mannose
P11717	N747	Hex(7)HexNAc(5)Fuc(1)NeuAc(0)	7_5_1_0	Hybrid-Fucosylated
P11717	N871	Hex(5)HexNAc(6)Fuc(0)NeuAc(0)	5_6_0_0	Complex
P11717	N871	Hex(7)HexNAc(6)Fuc(0)NeuAc(0)	7_6_0_0	Complex
P11717	N871	Hex(3)HexNAc(4)Fuc(3)NeuAc(0)	3_4_3_0	Complex-Fucosylated
P11717	N871	Hex(4)HexNAc(4)Fuc(3)NeuAc(0)	4_4_3_0	Complex-Fucosylated
P11717	N871	Hex(5)HexNAc(4)Fuc(2)NeuAc(0)	5_4_2_0	Complex-Fucosylated
P11717	N871	Hex(6)HexNAc(5)Fuc(3)NeuAc(0)	6_5_3_0	Complex-Fucosylated
P11717	N871	Hex(5)HexNAc(4)Fuc(1)NeuAc(1)	5_4_1_1	Complex-Sialofucosylated
P11717	N871	Hex(9)HexNAc(2)Fuc(0)NeuAc(0)	9_2_0_0	High mannose
P11717	N871	Hex(7)HexNAc(5)Fuc(2)NeuAc(0)	7_5_2_0	Hybrid-Fucosylated
P13473	N257	Hex(7)HexNAc(6)Fuc(0)NeuAc(0)	7_6_0_0	Complex
P13473	N257	Hex(4)HexNAc(3)Fuc(1)NeuAc(0)	4_3_1_0	Complex-Fucosylated
P13473	N257	Hex(5)HexNAc(4)Fuc(1)NeuAc(0)	5_4_1_0	Complex-Fucosylated
P13473	N257	Hex(6)HexNAc(5)Fuc(1)NeuAc(0)	6_5_1_0	Complex-Fucosylated
P13473	N257	Hex(7)HexNAc(6)Fuc(3)NeuAc(0)	7_6_3_0	Complex-Fucosylated
P13473	N257	Hex(4)HexNAc(5)Fuc(4)NeuAc(1)	4_5_4_1	Complex-Sialofucosylated
P13473	N257	Hex(5)HexNAc(4)Fuc(2)NeuAc(2)	5_4_2_2	Complex-Sialofucosylated
P13473	N257	Hex(6)HexNAc(5)Fuc(1)NeuAc(1)	6_5_1_1	Complex-Sialofucosylated
P13473	N257	Hex(7)HexNAc(6)Fuc(1)NeuAc(1)	7_6_1_1	Complex-Sialofucosylated
P13473	N257	Hex(5)HexNAc(4)Fuc(0)NeuAc(0)	5_4_0_0	Complex/Hybrid
P13473	N257	Hex(5)HexNAc(4)Fuc(0)NeuAc(1)	5_4_0_1	Complex/Hybrid-Sialylated
P13473	N257	Hex(6)HexNAc(5)Fuc(0)NeuAc(1)	6_5_0_1	Complex/Hybrid-Sialylated
P13473	N257	Hex(8)HexNAc(2)Fuc(0)NeuAc(0)	8_2_0_0	High mannose
P13473	N257	Hex(5)HexNAc(3)Fuc(1)NeuAc(0)	5_3_1_0	Hybrid-Fucosylated
P13473	N257	Hex(6)HexNAc(3)Fuc(1)NeuAc(0)	6_3_1_0	Hybrid-Fucosylated
P13473	N257	Hex(6)HexNAc(3)Fuc(2)NeuAc(0)	6_3_2_0	Hybrid-Fucosylated
P13473	N257	Hex(6)HexNAc(4)Fuc(1)NeuAc(0)	6_4_1_0	Hybrid-Fucosylated
P13473	N257	Hex(6)HexNAc(4)Fuc(2)NeuAc(0)	6_4_2_0	Hybrid-Fucosylated
P13473	N257	Hex(7)HexNAc(4)Fuc(2)NeuAc(0)	7_4_2_0	Hybrid-Fucosylated
P13473	N257	Hex(6)HexNAc(4)Fuc(0)NeuAc(1)	6_4_0_1	Hybrid-Sialylated
P13473	N275	Hex(5)HexNAc(4)Fuc(0)NeuAc(0)	5_4_0_0	Complex/Hybrid
P13473	N275	Hex(6)HexNAc(5)Fuc(0)NeuAc(1)	6_5_0_1	Complex/Hybrid-Sialylated
P13473	N275	Hex(9)HexNAc(2)Fuc(0)NeuAc(0)	9_2_0_0	High mannose
P13473	N356	Hex(6)HexNAc(5)Fuc(2)NeuAc(0)	6_5_2_0	Complex-Fucosylated
P13473	N356	Hex(6)HexNAc(5)Fuc(3)NeuAc(0)	6_5_3_0	Complex-Fucosylated
P13473	N356	Hex(7)HexNAc(6)Fuc(2)NeuAc(0)	7_6_2_0	Complex-Fucosylated
P13473	N356	Hex(6)HexNAc(5)Fuc(0)NeuAc(0)	6_5_0_0	Complex/Hybrid
P13473	N356	Hex(10)HexNAc(2)Fuc(0)NeuAc(0)	10_2_0_0	High mannose
P13473	N356	Hex(6)HexNAc(2)Fuc(0)NeuAc(0)	6_2_0_0	High mannose
P13473	N356	Hex(7)HexNAc(4)Fuc(0)NeuAc(0)	7_4_0_0	Hybrid
P13473	N356	Hex(6)HexNAc(3)Fuc(2)NeuAc(0)	6_3_2_0	Hybrid-Fucosylated
P13473	N356	Hex(7)HexNAc(4)Fuc(1)NeuAc(0)	7_4_1_0	Hybrid-Fucosylated
P13473	N58	Hex(4)HexNAc(3)Fuc(1)NeuAc(0)	4_3_1_0	Complex-Fucosylated
P13674	N113	Hex(9)HexNAc(2)Fuc(0)NeuAc(0)	9_2_0_0	High mannose
P14625	N217	Hex(7)HexNAc(2)Fuc(0)NeuAc(0)	7_2_0_0	High mannose
P14625	N217	Hex(9)HexNAc(2)Fuc(0)NeuAc(0)	9_2_0_0	High mannose
P15151	N120	Hex(5)HexNAc(4)Fuc(2)NeuAc(0)	5_4_2_0	Complex-Fucosylated
P15151	N120	Hex(6)HexNAc(5)Fuc(4)NeuAc(0)	6_5_4_0	Complex-Fucosylated
P15151	N120	Hex(7)HexNAc(6)Fuc(2)NeuAc(0)	7_6_2_0	Complex-Fucosylated
P15586	N362	Hex(8)HexNAc(2)Fuc(0)NeuAc(0)	8_2_0_0	High mannose
P15586	N362	Hex(9)HexNAc(2)Fuc(0)NeuAc(0)	9_2_0_0	High mannose
P15586	N449	Hex(5)HexNAc(6)Fuc(1)NeuAc(2)	5_6_1_2	Complex-Sialofucosylated
P16422	N111	Hex(3)HexNAc(4)Fuc(3)NeuAc(0)	3_4_3_0	Complex-Fucosylated
P16422	N111	Hex(7)HexNAc(2)Fuc(0)NeuAc(0)	7_2_0_0	High mannose
P16422	N111	Hex(8)HexNAc(2)Fuc(0)NeuAc(0)	8_2_0_0	High mannose
P16422	N111	Hex(9)HexNAc(2)Fuc(0)NeuAc(0)	9_2_0_0	High mannose
P17301	N432	Hex(8)HexNAc(2)Fuc(0)NeuAc(0)	8_2_0_0	High mannose
P18084	N586	Hex(8)HexNAc(2)Fuc(0)NeuAc(0)	8_2_0_0	High mannose
P19438	N54	Hex(9)HexNAc(2)Fuc(0)NeuAc(0)	9_2_0_0	High mannose
P19440	N511	Hex(7)HexNAc(6)Fuc(0)NeuAc(0)	7_6_0_0	Complex
P19440	N511	Hex(6)HexNAc(5)Fuc(2)NeuAc(0)	6_5_2_0	Complex-Fucosylated
P19440	N511	Hex(7)HexNAc(6)Fuc(1)NeuAc(0)	7_6_1_0	Complex-Fucosylated
P19440	N511	Hex(7)HexNAc(6)Fuc(1)NeuAc(1)	7_6_1_1	Complex-Sialofucosylated
P20645	N83	Hex(6)HexNAc(5)Fuc(1)NeuAc(0)	6_5_1_0	Complex-Fucosylated
P20645	N83	Hex(7)HexNAc(6)Fuc(1)NeuAc(0)	7_6_1_0	Complex-Fucosylated
P20645	N83	Hex(5)HexNAc(4)Fuc(2)NeuAc(1)	5_4_2_1	Complex-Sialofucosylated
P20645	N83	Hex(6)HexNAc(5)Fuc(2)NeuAc(1)	6_5_2_1	Complex-Sialofucosylated
P20645	N83	Hex(7)HexNAc(6)Fuc(1)NeuAc(1)	7_6_1_1	Complex-Sialofucosylated
P20645	N83	Hex(10)HexNAc(2)Fuc(0)NeuAc(0)	10_2_0_0	High mannose
P20645	N83	Hex(8)HexNAc(2)Fuc(0)NeuAc(0)	8_2_0_0	High mannose
P20645	N83	Hex(5)HexNAc(3)Fuc(2)NeuAc(0)	5_3_2_0	Hybrid-Fucosylated
P21860	N250	Hex(10)HexNAc(2)Fuc(0)NeuAc(0)	10_2_0_0	High mannose
P21860	N250	Hex(7)HexNAc(2)Fuc(0)NeuAc(0)	7_2_0_0	High mannose
P21860	N250	Hex(9)HexNAc(2)Fuc(0)NeuAc(0)	9_2_0_0	High mannose
P21860	N353	Hex(9)HexNAc(2)Fuc(0)NeuAc(0)	9_2_0_0	High mannose
P23229	N966	Hex(6)HexNAc(2)Fuc(0)NeuAc(0)	6_2_0_0	High mannose
P23229	N966	Hex(7)HexNAc(2)Fuc(0)NeuAc(0)	7_2_0_0	High mannose
P23229	N997	Hex(9)HexNAc(2)Fuc(0)NeuAc(0)	9_2_0_0	High mannose
P28827	N131	Hex(7)HexNAc(2)Fuc(0)NeuAc(0)	7_2_0_0	High mannose
P30825	N235	Hex(9)HexNAc(2)Fuc(0)NeuAc(0)	9_2_0_0	High mannose
P35613	N160	Hex(6)HexNAc(2)Fuc(0)NeuAc(0)	6_2_0_0	High mannose
P35613	N160	Hex(8)HexNAc(2)Fuc(0)NeuAc(0)	8_2_0_0	High mannose
P35613	N160	Hex(9)HexNAc(2)Fuc(0)NeuAc(0)	9_2_0_0	High mannose
P36941	N177	Hex(5)HexNAc(4)Fuc(2)NeuAc(0)	5_4_2_0	Complex-Fucosylated
P36941	N177	Hex(7)HexNAc(6)Fuc(2)NeuAc(0)	7_6_2_0	Complex-Fucosylated
P36941	N177	Hex(8)HexNAc(2)Fuc(0)NeuAc(0)	8_2_0_0	High mannose
P36941	N177	Hex(9)HexNAc(2)Fuc(0)NeuAc(0)	9_2_0_0	High mannose
P38435	N627	Hex(8)HexNAc(2)Fuc(0)NeuAc(0)	8_2_0_0	High mannose
P42261	N401	Hex(3)HexNAc(7)Fuc(1)NeuAc(0)	3_7_1_0	Complex-Fucosylated
P42702	N445	Hex(9)HexNAc(2)Fuc(0)NeuAc(0)	9_2_0_0	High mannose
P42702	N787	Hex(9)HexNAc(2)Fuc(0)NeuAc(0)	9_2_0_0	High mannose
P42892	N166	Hex(6)HexNAc(5)Fuc(1)NeuAc(0)	6_5_1_0	Complex-Fucosylated
P42892	N210	Hex(7)HexNAc(6)Fuc(0)NeuAc(0)	7_6_0_0	Complex
P42892	N210	Hex(5)HexNAc(4)Fuc(3)NeuAc(1)	5_4_3_1	Complex-Sialofucosylated
P42892	N270	Hex(7)HexNAc(6)Fuc(1)NeuAc(0)	7_6_1_0	Complex-Fucosylated
P43251	N349	Hex(6)HexNAc(2)Fuc(0)NeuAc(0)	6_2_0_0	High mannose
P43251	N349	Hex(8)HexNAc(2)Fuc(0)NeuAc(0)	8_2_0_0	High mannose
P43251	N349	Hex(9)HexNAc(2)Fuc(0)NeuAc(0)	9_2_0_0	High mannose
P43307	N136	Hex(3)HexNAc(4)Fuc(3)NeuAc(0)	3_4_3_0	Complex-Fucosylated
P43307	N136	Hex(3)HexNAc(5)Fuc(2)NeuAc(0)	3_5_2_0	Complex-Fucosylated
P43307	N136	Hex(4)HexNAc(4)Fuc(3)NeuAc(0)	4_4_3_0	Complex-Fucosylated
P43307	N136	Hex(4)HexNAc(4)Fuc(1)NeuAc(1)	4_4_1_1	Complex-Sialofucosylated
P43307	N136	Hex(7)HexNAc(2)Fuc(0)NeuAc(0)	7_2_0_0	High mannose
P43307	N191	Hex(8)HexNAc(2)Fuc(0)NeuAc(0)	8_2_0_0	High mannose
P43308	N104	Hex(3)HexNAc(4)Fuc(3)NeuAc(0)	3_4_3_0	Complex-Fucosylated
P43308	N104	Hex(6)HexNAc(2)Fuc(0)NeuAc(0)	6_2_0_0	High mannose
P43308	N88	Hex(4)HexNAc(5)Fuc(2)NeuAc(0)	4_5_2_0	Complex-Fucosylated
P43308	N88	Hex(5)HexNAc(5)Fuc(2)NeuAc(0)	5_5_2_0	Complex-Fucosylated
P43308	N88	Hex(10)HexNAc(2)Fuc(0)NeuAc(0)	10_2_0_0	High mannose
P43308	N88	Hex(7)HexNAc(2)Fuc(0)NeuAc(0)	7_2_0_0	High mannose
P43308	N88	Hex(8)HexNAc(2)Fuc(0)NeuAc(0)	8_2_0_0	High mannose
P43308	N88	Hex(9)HexNAc(2)Fuc(0)NeuAc(0)	9_2_0_0	High mannose
P46977	N537	Hex(9)HexNAc(2)Fuc(0)NeuAc(0)	9_2_0_0	High mannose
P46977	N548	Hex(10)HexNAc(2)Fuc(0)NeuAc(0)	10_2_0_0	High mannose
P46977	N548	Hex(7)HexNAc(2)Fuc(0)NeuAc(0)	7_2_0_0	High mannose
P46977	N548	Hex(8)HexNAc(2)Fuc(0)NeuAc(0)	8_2_0_0	High mannose
P48509	N159	Hex(6)HexNAc(5)Fuc(1)NeuAc(1)	6_5_1_1	Complex-Sialofucosylated
P48509	N159	Hex(8)HexNAc(2)Fuc(0)NeuAc(0)	8_2_0_0	High mannose
P48509	N159	Hex(9)HexNAc(2)Fuc(0)NeuAc(0)	9_2_0_0	High mannose
P48960	N108	Hex(6)HexNAc(5)Fuc(1)NeuAc(0)	6_5_1_0	Complex-Fucosylated
P48960	N371	Hex(9)HexNAc(2)Fuc(0)NeuAc(0)	9_2_0_0	High mannose
P50895	N439	Hex(5)HexNAc(4)Fuc(0)NeuAc(0)	5_4_0_0	Complex/Hybrid
P50895	N439	Hex(9)HexNAc(2)Fuc(0)NeuAc(0)	9_2_0_0	High mannose
P50897	N197	Hex(6)HexNAc(2)Fuc(0)NeuAc(0)	6_2_0_0	High mannose
P50897	N197	Hex(7)HexNAc(2)Fuc(0)NeuAc(0)	7_2_0_0	High mannose
P50897	N197	Hex(9)HexNAc(2)Fuc(0)NeuAc(0)	9_2_0_0	High mannose
P51689	N128	Hex(8)HexNAc(2)Fuc(0)NeuAc(0)	8_2_0_0	High mannose
P51689	N128	Hex(9)HexNAc(2)Fuc(0)NeuAc(0)	9_2_0_0	High mannose
P51805	N1009	Hex(9)HexNAc(2)Fuc(0)NeuAc(0)	9_2_0_0	High mannose
P52799	N139	Hex(5)HexNAc(4)Fuc(1)NeuAc(0)	5_4_1_0	Complex-Fucosylated
P52803	N37	Hex(10)HexNAc(2)Fuc(0)NeuAc(0)	10_2_0_0	High mannose
P52803	N37	Hex(9)HexNAc(2)Fuc(0)NeuAc(0)	9_2_0_0	High mannose
P53801	N54	Hex(7)HexNAc(2)Fuc(0)NeuAc(0)	7_2_0_0	High mannose
P53801	N54	Hex(8)HexNAc(2)Fuc(0)NeuAc(0)	8_2_0_0	High mannose
P54709	N124	Hex(5)HexNAc(4)Fuc(1)NeuAc(0)	5_4_1_0	Complex-Fucosylated
P54709	N124	Hex(5)HexNAc(4)Fuc(2)NeuAc(0)	5_4_2_0	Complex-Fucosylated
P54709	N124	Hex(5)HexNAc(4)Fuc(3)NeuAc(0)	5_4_3_0	Complex-Fucosylated
P54709	N124	Hex(6)HexNAc(5)Fuc(3)NeuAc(0)	6_5_3_0	Complex-Fucosylated
P54709	N124	Hex(7)HexNAc(6)Fuc(4)NeuAc(0)	7_6_4_0	Complex-Fucosylated
P54709	N124	Hex(8)HexNAc(2)Fuc(0)NeuAc(0)	8_2_0_0	High mannose
P54802	N261	Hex(10)HexNAc(2)Fuc(0)NeuAc(0)	10_2_0_0	High mannose
P54802	N503	Hex(4)HexNAc(4)Fuc(2)NeuAc(1)	4_4_2_1	Complex-Sialofucosylated
P54802	N503	Hex(10)HexNAc(2)Fuc(0)NeuAc(0)	10_2_0_0	High mannose
P54802	N503	Hex(9)HexNAc(2)Fuc(0)NeuAc(0)	9_2_0_0	High mannose
P54855	N65	Hex(10)HexNAc(2)Fuc(0)NeuAc(0)	10_2_0_0	High mannose
P54855	N65	Hex(7)HexNAc(2)Fuc(0)NeuAc(0)	7_2_0_0	High mannose
P54855	N65	Hex(8)HexNAc(2)Fuc(0)NeuAc(0)	8_2_0_0	High mannose
P54855	N65	Hex(9)HexNAc(2)Fuc(0)NeuAc(0)	9_2_0_0	High mannose
P55268	N1348	Hex(6)HexNAc(2)Fuc(0)NeuAc(0)	6_2_0_0	High mannose
P55268	N1348	Hex(7)HexNAc(2)Fuc(0)NeuAc(0)	7_2_0_0	High mannose
P55268	N1348	Hex(8)HexNAc(2)Fuc(0)NeuAc(0)	8_2_0_0	High mannose
P78310	N106	Hex(5)HexNAc(4)Fuc(1)NeuAc(0)	5_4_1_0	Complex-Fucosylated
P78310	N106	Hex(5)HexNAc(4)Fuc(2)NeuAc(0)	5_4_2_0	Complex-Fucosylated
P78536	N594	Hex(5)HexNAc(4)Fuc(2)NeuAc(0)	5_4_2_0	Complex-Fucosylated
P78536	N594	Hex(6)HexNAc(5)Fuc(1)NeuAc(1)	6_5_1_1	Complex-Sialofucosylated
Q02083	N37	Hex(4)HexNAc(4)Fuc(2)NeuAc(1)	4_4_2_1	Complex-Sialofucosylated
Q02083	N37	Hex(10)HexNAc(2)Fuc(0)NeuAc(0)	10_2_0_0	High mannose
Q02083	N37	Hex(9)HexNAc(2)Fuc(0)NeuAc(0)	9_2_0_0	High mannose
Q02487	N546	Hex(7)HexNAc(2)Fuc(0)NeuAc(0)	7_2_0_0	High mannose
Q02742	N58	Hex(6)HexNAc(2)Fuc(0)NeuAc(0)	6_2_0_0	High mannose
Q02742	N58	Hex(8)HexNAc(2)Fuc(0)NeuAc(0)	8_2_0_0	High mannose
Q02742	N58	Hex(6)HexNAc(3)Fuc(2)NeuAc(0)	6_3_2_0	Hybrid-Fucosylated
Q02809	N538	Hex(8)HexNAc(2)Fuc(0)NeuAc(0)	8_2_0_0	High mannose
Q04609	N121	Hex(10)HexNAc(2)Fuc(0)NeuAc(0)	10_2_0_0	High mannose
Q04609	N121	Hex(9)HexNAc(2)Fuc(0)NeuAc(0)	9_2_0_0	High mannose
Q04609	N195	Hex(5)HexNAc(4)Fuc(1)NeuAc(0)	5_4_1_0	Complex-Fucosylated
Q04609	N195	Hex(9)HexNAc(2)Fuc(0)NeuAc(0)	9_2_0_0	High mannose
Q04609	N195	Hex(5)HexNAc(3)Fuc(1)NeuAc(0)	5_3_1_0	Hybrid-Fucosylated
Q04609	N195	Hex(6)HexNAc(4)Fuc(1)NeuAc(0)	6_4_1_0	Hybrid-Fucosylated
Q04609	N336	Hex(4)HexNAc(3)Fuc(1)NeuAc(0)	4_3_1_0	Complex-Fucosylated
Q04609	N336	Hex(5)HexNAc(4)Fuc(1)NeuAc(0)	5_4_1_0	Complex-Fucosylated
Q04609	N336	Hex(5)HexNAc(6)Fuc(1)NeuAc(0)	5_6_1_0	Complex-Fucosylated
Q04609	N336	Hex(6)HexNAc(5)Fuc(2)NeuAc(0)	6_5_2_0	Complex-Fucosylated
Q04609	N336	Hex(6)HexNAc(7)Fuc(1)NeuAc(0)	6_7_1_0	Complex-Fucosylated
Q04609	N336	Hex(7)HexNAc(6)Fuc(2)NeuAc(0)	7_6_2_0	Complex-Fucosylated
Q04609	N336	Hex(7)HexNAc(6)Fuc(5)NeuAc(0)	7_6_5_0	Complex-Fucosylated
Q04609	N336	Hex(4)HexNAc(4)Fuc(2)NeuAc(1)	4_4_2_1	Complex-Sialofucosylated
Q04609	N336	Hex(10)HexNAc(2)Fuc(0)NeuAc(0)	10_2_0_0	High mannose
Q04609	N336	Hex(6)HexNAc(2)Fuc(0)NeuAc(0)	6_2_0_0	High mannose
Q04609	N336	Hex(7)HexNAc(2)Fuc(0)NeuAc(0)	7_2_0_0	High mannose
Q04609	N336	Hex(8)HexNAc(2)Fuc(0)NeuAc(0)	8_2_0_0	High mannose
Q04609	N336	Hex(9)HexNAc(2)Fuc(0)NeuAc(0)	9_2_0_0	High mannose
Q04609	N459	Hex(5)HexNAc(6)Fuc(0)NeuAc(0)	5_6_0_0	Complex
Q04609	N459	Hex(7)HexNAc(2)Fuc(0)NeuAc(0)	7_2_0_0	High mannose
Q04609	N476	Hex(10)HexNAc(2)Fuc(0)NeuAc(0)	10_2_0_0	High mannose
Q04609	N476	Hex(8)HexNAc(2)Fuc(0)NeuAc(0)	8_2_0_0	High mannose
Q04609	N476	Hex(9)HexNAc(2)Fuc(0)NeuAc(0)	9_2_0_0	High mannose
Q04609	N638	Hex(4)HexNAc(4)Fuc(2)NeuAc(1)	4_4_2_1	Complex-Sialofucosylated
Q04609	N638	Hex(10)HexNAc(2)Fuc(0)NeuAc(0)	10_2_0_0	High mannose
Q04609	N638	Hex(7)HexNAc(2)Fuc(0)NeuAc(0)	7_2_0_0	High mannose
Q04609	N638	Hex(8)HexNAc(2)Fuc(0)NeuAc(0)	8_2_0_0	High mannose
Q04609	N638	Hex(9)HexNAc(2)Fuc(0)NeuAc(0)	9_2_0_0	High mannose
Q04609	N638	Hex(6)HexNAc(3)Fuc(0)NeuAc(0)	6_3_0_0	Hybrid
Q04609	N76	Hex(5)HexNAc(4)Fuc(0)NeuAc(1)	5_4_0_1	Complex/Hybrid-Sialylated
Q04609	N76	Hex(10)HexNAc(2)Fuc(0)NeuAc(0)	10_2_0_0	High mannose
Q04609	N76	Hex(6)HexNAc(2)Fuc(0)NeuAc(0)	6_2_0_0	High mannose
Q04609	N76	Hex(7)HexNAc(2)Fuc(0)NeuAc(0)	7_2_0_0	High mannose
Q04609	N76	Hex(8)HexNAc(2)Fuc(0)NeuAc(0)	8_2_0_0	High mannose
Q04609	N76	Hex(9)HexNAc(2)Fuc(0)NeuAc(0)	9_2_0_0	High mannose
Q04609	N76	Hex(6)HexNAc(3)Fuc(0)NeuAc(0)	6_3_0_0	Hybrid
Q04609	N76	Hex(6)HexNAc(3)Fuc(1)NeuAc(0)	6_3_1_0	Hybrid-Fucosylated
Q04900	N146	Hex(8)HexNAc(2)Fuc(0)NeuAc(0)	8_2_0_0	High mannose
Q04900	N146	Hex(9)HexNAc(2)Fuc(0)NeuAc(0)	9_2_0_0	High mannose
Q08380	N69	Hex(9)HexNAc(2)Fuc(0)NeuAc(0)	9_2_0_0	High mannose
Q08722	N111	Hex(8)HexNAc(2)Fuc(0)NeuAc(0)	8_2_0_0	High mannose
Q08722	N111	Hex(5)HexNAc(3)Fuc(2)NeuAc(0)	5_3_2_0	Hybrid-Fucosylated
Q08722	N111	Hex(5)HexNAc(3)Fuc(0)NeuAc(1)	5_3_0_1	Hybrid-Sialylated
Q08722	N73	Hex(7)HexNAc(2)Fuc(0)NeuAc(0)	7_2_0_0	High mannose
Q08722	N73	Hex(7)HexNAc(4)Fuc(0)NeuAc(0)	7_4_0_0	Hybrid
Q10472	N552	Hex(4)HexNAc(5)Fuc(2)NeuAc(0)	4_5_2_0	Complex-Fucosylated
Q11201	N201	Hex(7)HexNAc(6)Fuc(0)NeuAc(0)	7_6_0_0	Complex
Q11201	N201	Hex(5)HexNAc(4)Fuc(2)NeuAc(1)	5_4_2_1	Complex-Sialofucosylated
Q11201	N323	Hex(7)HexNAc(6)Fuc(0)NeuAc(0)	7_6_0_0	Complex
Q11201	N323	Hex(6)HexNAc(5)Fuc(4)NeuAc(1)	6_5_4_1	Complex-Sialofucosylated
Q11201	N323	Hex(7)HexNAc(6)Fuc(5)NeuAc(1)	7_6_5_1	Complex-Sialofucosylated
Q11201	N79	Hex(6)HexNAc(3)Fuc(2)NeuAc(0)	6_3_2_0	Hybrid-Fucosylated
Q12770	N590	Hex(8)HexNAc(2)Fuc(0)NeuAc(0)	8_2_0_0	High mannose
Q12797	N12	Hex(5)HexNAc(4)Fuc(0)NeuAc(2)	5_4_0_2	Complex-Sialylated
Q12797	N12	Hex(12)HexNAc(2)Fuc(0)NeuAc(0)	12_2_0_0	High mannose
Q12797	N12	Hex(6)HexNAc(4)Fuc(2)NeuAc(1)	6_4_2_1	Hybrid-Sialofucosylated
Q12797	N452	Hex(9)HexNAc(2)Fuc(0)NeuAc(0)	9_2_0_0	High mannose
Q12891	N103	Hex(10)HexNAc(2)Fuc(0)NeuAc(0)	10_2_0_0	High mannose
Q12913	N413	Hex(7)HexNAc(6)Fuc(1)NeuAc(0)	7_6_1_0	Complex-Fucosylated
Q12913	N413	Hex(7)HexNAc(6)Fuc(2)NeuAc(0)	7_6_2_0	Complex-Fucosylated
Q13308	N175	Hex(4)HexNAc(5)Fuc(1)NeuAc(0)	4_5_1_0	Complex-Fucosylated
Q13308	N175	Hex(5)HexNAc(4)Fuc(1)NeuAc(0)	5_4_1_0	Complex-Fucosylated
Q13308	N175	Hex(9)HexNAc(2)Fuc(0)NeuAc(0)	9_2_0_0	High mannose
Q13308	N405	Hex(5)HexNAc(4)Fuc(1)NeuAc(0)	5_4_1_0	Complex-Fucosylated
Q13308	N405	Hex(5)HexNAc(4)Fuc(2)NeuAc(0)	5_4_2_0	Complex-Fucosylated
Q13308	N567	Hex(5)HexNAc(4)Fuc(0)NeuAc(1)	5_4_0_1	Complex/Hybrid-Sialylated
Q13433	N241	Hex(10)HexNAc(2)Fuc(0)NeuAc(0)	10_2_0_0	High mannose
Q13433	N241	Hex(8)HexNAc(2)Fuc(0)NeuAc(0)	8_2_0_0	High mannose
Q13433	N266	Hex(5)HexNAc(4)Fuc(1)NeuAc(0)	5_4_1_0	Complex-Fucosylated
Q13433	N266	Hex(6)HexNAc(5)Fuc(1)NeuAc(0)	6_5_1_0	Complex-Fucosylated
Q13433	N266	Hex(10)HexNAc(2)Fuc(0)NeuAc(0)	10_2_0_0	High mannose
Q13433	N266	Hex(7)HexNAc(2)Fuc(0)NeuAc(0)	7_2_0_0	High mannose
Q13433	N266	Hex(9)HexNAc(2)Fuc(0)NeuAc(0)	9_2_0_0	High mannose
Q13433	N67	Hex(8)HexNAc(2)Fuc(0)NeuAc(0)	8_2_0_0	High mannose
Q13438	N177	Hex(6)HexNAc(2)Fuc(0)NeuAc(0)	6_2_0_0	High mannose
Q13438	N177	Hex(7)HexNAc(2)Fuc(0)NeuAc(0)	7_2_0_0	High mannose
Q13438	N177	Hex(8)HexNAc(2)Fuc(0)NeuAc(0)	8_2_0_0	High mannose
Q13438	N177	Hex(9)HexNAc(2)Fuc(0)NeuAc(0)	9_2_0_0	High mannose
Q13443	N231	Hex(6)HexNAc(3)Fuc(1)NeuAc(0)	6_3_1_0	Hybrid-Fucosylated
Q13443	N381	Hex(10)HexNAc(2)Fuc(0)NeuAc(0)	10_2_0_0	High mannose
Q13443	N381	Hex(7)HexNAc(2)Fuc(0)NeuAc(0)	7_2_0_0	High mannose
Q13443	N381	Hex(8)HexNAc(2)Fuc(0)NeuAc(0)	8_2_0_0	High mannose
Q13443	N381	Hex(9)HexNAc(2)Fuc(0)NeuAc(0)	9_2_0_0	High mannose
Q13443	N487	Hex(4)HexNAc(4)Fuc(3)NeuAc(0)	4_4_3_0	Complex-Fucosylated
Q13443	N487	Hex(6)HexNAc(2)Fuc(0)NeuAc(0)	6_2_0_0	High mannose
Q13443	N487	Hex(7)HexNAc(2)Fuc(0)NeuAc(0)	7_2_0_0	High mannose
Q13443	N487	Hex(6)HexNAc(3)Fuc(0)NeuAc(0)	6_3_0_0	Hybrid
Q13443	N487	Hex(5)HexNAc(3)Fuc(1)NeuAc(0)	5_3_1_0	Hybrid-Fucosylated
Q13510	N259	Hex(9)HexNAc(2)Fuc(0)NeuAc(0)	9_2_0_0	High mannose
Q13530	N315	Hex(8)HexNAc(2)Fuc(0)NeuAc(0)	8_2_0_0	High mannose
Q13586	N171	Hex(8)HexNAc(2)Fuc(0)NeuAc(0)	8_2_0_0	High mannose
Q13586	N171	Hex(9)HexNAc(2)Fuc(0)NeuAc(0)	9_2_0_0	High mannose
Q13740	N167	Hex(5)HexNAc(4)Fuc(1)NeuAc(0)	5_4_1_0	Complex-Fucosylated
Q13740	N167	Hex(5)HexNAc(4)Fuc(0)NeuAc(1)	5_4_0_1	Complex/Hybrid-Sialylated
Q13740	N480	Hex(6)HexNAc(5)Fuc(1)NeuAc(0)	6_5_1_0	Complex-Fucosylated
Q13740	N480	Hex(6)HexNAc(3)Fuc(0)NeuAc(0)	6_3_0_0	Hybrid
Q14108	N105	Hex(7)HexNAc(6)Fuc(1)NeuAc(0)	7_6_1_0	Complex-Fucosylated
Q14108	N105	Hex(7)HexNAc(6)Fuc(3)NeuAc(0)	7_6_3_0	Complex-Fucosylated
Q14108	N105	Hex(7)HexNAc(6)Fuc(1)NeuAc(1)	7_6_1_1	Complex-Sialofucosylated
Q14108	N105	Hex(7)HexNAc(6)Fuc(0)NeuAc(1)	7_6_0_1	Complex-Sialylated
Q14108	N105	Hex(10)HexNAc(2)Fuc(0)NeuAc(0)	10_2_0_0	High mannose
Q14108	N105	Hex(8)HexNAc(2)Fuc(0)NeuAc(0)	8_2_0_0	High mannose
Q14108	N105	Hex(9)HexNAc(2)Fuc(0)NeuAc(0)	9_2_0_0	High mannose
Q14108	N224	Hex(6)HexNAc(6)Fuc(1)NeuAc(2)	6_6_1_2	Complex-Sialofucosylated
Q14108	N224	Hex(7)HexNAc(6)Fuc(3)NeuAc(1)	7_6_3_1	Complex-Sialofucosylated
Q14108	N224	Hex(7)HexNAc(2)Fuc(0)NeuAc(0)	7_2_0_0	High mannose
Q14108	N224	Hex(8)HexNAc(2)Fuc(0)NeuAc(0)	8_2_0_0	High mannose
Q14108	N249	Hex(10)HexNAc(2)Fuc(0)NeuAc(0)	10_2_0_0	High mannose
Q14108	N249	Hex(8)HexNAc(2)Fuc(0)NeuAc(0)	8_2_0_0	High mannose
Q14108	N249	Hex(9)HexNAc(2)Fuc(0)NeuAc(0)	9_2_0_0	High mannose
Q14108	N412	Hex(8)HexNAc(2)Fuc(0)NeuAc(0)	8_2_0_0	High mannose
Q14108	N412	Hex(9)HexNAc(2)Fuc(0)NeuAc(0)	9_2_0_0	High mannose
Q14118	N661	Hex(8)HexNAc(2)Fuc(0)NeuAc(0)	8_2_0_0	High mannose
Q14126	N182	Hex(4)HexNAc(6)Fuc(0)NeuAc(0)	4_6_0_0	Complex
Q14126	N182	Hex(5)HexNAc(4)Fuc(2)NeuAc(0)	5_4_2_0	Complex-Fucosylated
Q14126	N182	Hex(9)HexNAc(2)Fuc(0)NeuAc(0)	9_2_0_0	High mannose
Q14126	N462	Hex(5)HexNAc(4)Fuc(2)NeuAc(0)	5_4_2_0	Complex-Fucosylated
Q14643	N2512	Hex(6)HexNAc(2)Fuc(0)NeuAc(0)	6_2_0_0	High mannose
Q15043	N77	Hex(7)HexNAc(6)Fuc(1)NeuAc(0)	7_6_1_0	Complex-Fucosylated
Q15043	N77	Hex(8)HexNAc(2)Fuc(0)NeuAc(0)	8_2_0_0	High mannose
Q15165	N254	Hex(8)HexNAc(2)Fuc(0)NeuAc(0)	8_2_0_0	High mannose
Q15165	N323	Hex(3)HexNAc(5)Fuc(1)NeuAc(0)	3_5_1_0	Complex-Fucosylated
Q15165	N323	Hex(4)HexNAc(5)Fuc(0)NeuAc(1)	4_5_0_1	Complex-Sialylated
Q15904	N261	Hex(4)HexNAc(4)Fuc(3)NeuAc(0)	4_4_3_0	Complex-Fucosylated
Q15904	N261	Hex(4)HexNAc(4)Fuc(2)NeuAc(1)	4_4_2_1	Complex-Sialofucosylated
Q15904	N261	Hex(10)HexNAc(2)Fuc(0)NeuAc(0)	10_2_0_0	High mannose
Q15904	N261	Hex(6)HexNAc(2)Fuc(0)NeuAc(0)	6_2_0_0	High mannose
Q15904	N261	Hex(7)HexNAc(2)Fuc(0)NeuAc(0)	7_2_0_0	High mannose
Q15904	N261	Hex(8)HexNAc(2)Fuc(0)NeuAc(0)	8_2_0_0	High mannose
Q15904	N261	Hex(9)HexNAc(2)Fuc(0)NeuAc(0)	9_2_0_0	High mannose
Q16563	N71	Hex(4)HexNAc(4)Fuc(2)NeuAc(1)	4_4_2_1	Complex-Sialofucosylated
Q16563	N71	Hex(10)HexNAc(2)Fuc(0)NeuAc(0)	10_2_0_0	High mannose
Q16563	N71	Hex(5)HexNAc(2)Fuc(0)NeuAc(0)	5_2_0_0	High mannose
Q16563	N71	Hex(6)HexNAc(2)Fuc(0)NeuAc(0)	6_2_0_0	High mannose
Q16563	N71	Hex(7)HexNAc(2)Fuc(0)NeuAc(0)	7_2_0_0	High mannose
Q16563	N71	Hex(8)HexNAc(2)Fuc(0)NeuAc(0)	8_2_0_0	High mannose
Q16563	N71	Hex(9)HexNAc(2)Fuc(0)NeuAc(0)	9_2_0_0	High mannose
Q16563	N71	Hex(5)HexNAc(3)Fuc(1)NeuAc(0)	5_3_1_0	Hybrid-Fucosylated
Q16563	N71	Hex(5)HexNAc(3)Fuc(2)NeuAc(0)	5_3_2_0	Hybrid-Fucosylated
Q16563	N71	Hex(6)HexNAc(3)Fuc(1)NeuAc(0)	6_3_1_0	Hybrid-Fucosylated
Q16563	N71	Hex(7)HexNAc(4)Fuc(2)NeuAc(0)	7_4_2_0	Hybrid-Fucosylated
Q16880	N442	Hex(9)HexNAc(2)Fuc(0)NeuAc(0)	9_2_0_0	High mannose
Q32P28	N540	Hex(8)HexNAc(2)Fuc(0)NeuAc(0)	8_2_0_0	High mannose
Q4G148	N237	Hex(9)HexNAc(2)Fuc(0)NeuAc(0)	9_2_0_0	High mannose
Q4ZIN3	N189	Hex(9)HexNAc(2)Fuc(0)NeuAc(0)	9_2_0_0	High mannose
Q58DX5	N295	Hex(5)HexNAc(4)Fuc(1)NeuAc(0)	5_4_1_0	Complex-Fucosylated
Q58DX5	N295	Hex(6)HexNAc(5)Fuc(1)NeuAc(0)	6_5_1_0	Complex-Fucosylated
Q58DX5	N295	Hex(10)HexNAc(2)Fuc(0)NeuAc(0)	10_2_0_0	High mannose
Q58DX5	N534	Hex(10)HexNAc(2)Fuc(0)NeuAc(0)	10_2_0_0	High mannose
Q58DX5	N534	Hex(6)HexNAc(2)Fuc(0)NeuAc(0)	6_2_0_0	High mannose
Q58DX5	N534	Hex(7)HexNAc(2)Fuc(0)NeuAc(0)	7_2_0_0	High mannose
Q58DX5	N534	Hex(8)HexNAc(2)Fuc(0)NeuAc(0)	8_2_0_0	High mannose
Q58DX5	N556	Hex(6)HexNAc(5)Fuc(1)NeuAc(0)	6_5_1_0	Complex-Fucosylated
Q5JPE7	N218	Hex(4)HexNAc(4)Fuc(3)NeuAc(0)	4_4_3_0	Complex-Fucosylated
Q5JPE7	N218	Hex(4)HexNAc(4)Fuc(1)NeuAc(1)	4_4_1_1	Complex-Sialofucosylated
Q5JPE7	N218	Hex(7)HexNAc(2)Fuc(0)NeuAc(0)	7_2_0_0	High mannose
Q5JPE7	N369	Hex(6)HexNAc(2)Fuc(0)NeuAc(0)	6_2_0_0	High mannose
Q5JPE7	N369	Hex(7)HexNAc(2)Fuc(0)NeuAc(0)	7_2_0_0	High mannose
Q5JPE7	N369	Hex(8)HexNAc(2)Fuc(0)NeuAc(0)	8_2_0_0	High mannose
Q5JPE7	N369	Hex(9)HexNAc(2)Fuc(0)NeuAc(0)	9_2_0_0	High mannose
Q5JPE7	N618	Hex(8)HexNAc(2)Fuc(0)NeuAc(0)	8_2_0_0	High mannose
Q5JPE7	N618	Hex(9)HexNAc(2)Fuc(0)NeuAc(0)	9_2_0_0	High mannose
Q5JRA6	N246	Hex(6)HexNAc(2)Fuc(0)NeuAc(0)	6_2_0_0	High mannose
Q5JRA6	N246	Hex(8)HexNAc(2)Fuc(0)NeuAc(0)	8_2_0_0	High mannose
Q5JRA6	N246	Hex(6)HexNAc(3)Fuc(0)NeuAc(0)	6_3_0_0	Hybrid
Q5JRA6	N250	Hex(6)HexNAc(2)Fuc(0)NeuAc(0)	6_2_0_0	High mannose
Q5JRA6	N250	Hex(8)HexNAc(2)Fuc(0)NeuAc(0)	8_2_0_0	High mannose
Q5JRA6	N589	Hex(8)HexNAc(2)Fuc(0)NeuAc(0)	8_2_0_0	High mannose
Q5JTV8	N268	Hex(12)HexNAc(2)Fuc(0)NeuAc(0)	12_2_0_0	High mannose
Q5KU26	N271	Hex(8)HexNAc(2)Fuc(0)NeuAc(0)	8_2_0_0	High mannose
Q5VW38	N169	Hex(5)HexNAc(4)Fuc(2)NeuAc(1)	5_4_2_1	Complex-Sialofucosylated
Q5VW38	N169	Hex(5)HexNAc(4)Fuc(3)NeuAc(1)	5_4_3_1	Complex-Sialofucosylated
Q5ZPR3	N104	Hex(6)HexNAc(5)Fuc(1)NeuAc(0)	6_5_1_0	Complex-Fucosylated
Q5ZPR3	N104	Hex(4)HexNAc(5)Fuc(0)NeuAc(0)	4_5_0_0	Complex/Hybrid
Q5ZPR3	N104	Hex(5)HexNAc(4)Fuc(0)NeuAc(0)	5_4_0_0	Complex/Hybrid
Q5ZPR3	N104	Hex(7)HexNAc(2)Fuc(0)NeuAc(0)	7_2_0_0	High mannose
Q5ZPR3	N104	Hex(9)HexNAc(2)Fuc(0)NeuAc(0)	9_2_0_0	High mannose
Q5ZPR3	N104	Hex(6)HexNAc(3)Fuc(0)NeuAc(0)	6_3_0_0	Hybrid
Q5ZPR3	N104	Hex(5)HexNAc(3)Fuc(1)NeuAc(0)	5_3_1_0	Hybrid-Fucosylated
Q5ZPR3	N104	Hex(5)HexNAc(3)Fuc(2)NeuAc(0)	5_3_2_0	Hybrid-Fucosylated
Q5ZPR3	N215	Hex(5)HexNAc(4)Fuc(1)NeuAc(0)	5_4_1_0	Complex-Fucosylated
Q5ZPR3	N215	Hex(7)HexNAc(6)Fuc(1)NeuAc(0)	7_6_1_0	Complex-Fucosylated
Q5ZPR3	N322	Hex(6)HexNAc(2)Fuc(0)NeuAc(0)	6_2_0_0	High mannose
Q5ZPR3	N322	Hex(5)HexNAc(3)Fuc(0)NeuAc(0)	5_3_0_0	Hybrid
Q5ZPR3	N433	Hex(5)HexNAc(4)Fuc(2)NeuAc(0)	5_4_2_0	Complex-Fucosylated
Q5ZPR3	N91	Hex(4)HexNAc(5)Fuc(1)NeuAc(0)	4_5_1_0	Complex-Fucosylated
Q5ZPR3	N91	Hex(4)HexNAc(5)Fuc(2)NeuAc(0)	4_5_2_0	Complex-Fucosylated
Q5ZPR3	N91	Hex(5)HexNAc(4)Fuc(1)NeuAc(0)	5_4_1_0	Complex-Fucosylated
Q5ZPR3	N91	Hex(5)HexNAc(4)Fuc(2)NeuAc(0)	5_4_2_0	Complex-Fucosylated
Q5ZPR3	N91	Hex(6)HexNAc(5)Fuc(2)NeuAc(0)	6_5_2_0	Complex-Fucosylated
Q5ZPR3	N91	Hex(7)HexNAc(6)Fuc(2)NeuAc(0)	7_6_2_0	Complex-Fucosylated
Q5ZPR3	N91	Hex(7)HexNAc(6)Fuc(4)NeuAc(0)	7_6_4_0	Complex-Fucosylated
Q5ZPR3	N91	Hex(5)HexNAc(6)Fuc(1)NeuAc(1)	5_6_1_1	Complex-Sialofucosylated
Q5ZPR3	N91	Hex(6)HexNAc(4)Fuc(0)NeuAc(0)	6_4_0_0	Hybrid
Q5ZPR3	N91	Hex(7)HexNAc(5)Fuc(0)NeuAc(0)	7_5_0_0	Hybrid
Q5ZPR3	N91	Hex(7)HexNAc(5)Fuc(2)NeuAc(0)	7_5_2_0	Hybrid-Fucosylated
Q68CP4	N142	Hex(6)HexNAc(2)Fuc(0)NeuAc(0)	6_2_0_0	High mannose
Q68CP4	N142	Hex(7)HexNAc(2)Fuc(0)NeuAc(0)	7_2_0_0	High mannose
Q68CP4	N142	Hex(8)HexNAc(2)Fuc(0)NeuAc(0)	8_2_0_0	High mannose
Q68CP4	N142	Hex(9)HexNAc(2)Fuc(0)NeuAc(0)	9_2_0_0	High mannose
Q68CP4	N461	Hex(8)HexNAc(2)Fuc(0)NeuAc(0)	8_2_0_0	High mannose
Q68CP4	N461	Hex(9)HexNAc(2)Fuc(0)NeuAc(0)	9_2_0_0	High mannose
Q68CR1	N382	Hex(8)HexNAc(2)Fuc(0)NeuAc(0)	8_2_0_0	High mannose
Q68CR1	N382	Hex(9)HexNAc(2)Fuc(0)NeuAc(0)	9_2_0_0	High mannose
Q68CR1	N394	Hex(9)HexNAc(2)Fuc(0)NeuAc(0)	9_2_0_0	High mannose
Q68CR1	N527	Hex(4)HexNAc(4)Fuc(2)NeuAc(1)	4_4_2_1	Complex-Sialofucosylated
Q68CR1	N527	Hex(10)HexNAc(2)Fuc(0)NeuAc(0)	10_2_0_0	High mannose
Q68CR1	N527	Hex(8)HexNAc(2)Fuc(0)NeuAc(0)	8_2_0_0	High mannose
Q68CR1	N527	Hex(9)HexNAc(2)Fuc(0)NeuAc(0)	9_2_0_0	High mannose
Q68CR1	N937	Hex(4)HexNAc(4)Fuc(2)NeuAc(1)	4_4_2_1	Complex-Sialofucosylated
Q68CR1	N937	Hex(10)HexNAc(2)Fuc(0)NeuAc(0)	10_2_0_0	High mannose
Q6NUS6	N165	Hex(10)HexNAc(2)Fuc(0)NeuAc(0)	10_2_0_0	High mannose
Q6NUS6	N165	Hex(9)HexNAc(2)Fuc(0)NeuAc(0)	9_2_0_0	High mannose
Q6NUS6	N78	Hex(9)HexNAc(2)Fuc(0)NeuAc(0)	9_2_0_0	High mannose
Q6P4Q7	N122	Hex(8)HexNAc(2)Fuc(0)NeuAc(0)	8_2_0_0	High mannose
Q6P4Q7	N127	Hex(6)HexNAc(5)Fuc(1)NeuAc(0)	6_5_1_0	Complex-Fucosylated
Q6UWV2	N123	Hex(7)HexNAc(2)Fuc(0)NeuAc(0)	7_2_0_0	High mannose
Q6UXD5	N373	Hex(6)HexNAc(6)Fuc(0)NeuAc(3)	6_6_0_3	Complex-Sialylated
Q6ZXV5	N541	Hex(8)HexNAc(2)Fuc(0)NeuAc(0)	8_2_0_0	High mannose
Q70UQ0	N144	Hex(9)HexNAc(2)Fuc(0)NeuAc(0)	9_2_0_0	High mannose
Q7Z2K6	N819	Hex(8)HexNAc(2)Fuc(0)NeuAc(0)	8_2_0_0	High mannose
Q7Z7H5	N117	Hex(6)HexNAc(2)Fuc(0)NeuAc(0)	6_2_0_0	High mannose
Q7Z7H5	N117	Hex(7)HexNAc(2)Fuc(0)NeuAc(0)	7_2_0_0	High mannose
Q7Z7H5	N117	Hex(8)HexNAc(2)Fuc(0)NeuAc(0)	8_2_0_0	High mannose
Q7Z7M0	N1271	Hex(9)HexNAc(2)Fuc(0)NeuAc(0)	9_2_0_0	High mannose
Q7Z7M0	N421	Hex(9)HexNAc(2)Fuc(0)NeuAc(0)	9_2_0_0	High mannose
Q86SQ4	N324	Hex(9)HexNAc(2)Fuc(0)NeuAc(0)	9_2_0_0	High mannose
Q86SQ4	N750	Hex(8)HexNAc(2)Fuc(0)NeuAc(0)	8_2_0_0	High mannose
Q86SQ4	N818	Hex(8)HexNAc(2)Fuc(0)NeuAc(0)	8_2_0_0	High mannose
Q86WC4	N135	Hex(6)HexNAc(2)Fuc(0)NeuAc(0)	6_2_0_0	High mannose
Q86WC4	N135	Hex(7)HexNAc(2)Fuc(0)NeuAc(0)	7_2_0_0	High mannose
Q86WC4	N135	Hex(8)HexNAc(2)Fuc(0)NeuAc(0)	8_2_0_0	High mannose
Q86WC4	N216	Hex(8)HexNAc(2)Fuc(0)NeuAc(0)	8_2_0_0	High mannose
Q86XS8	N135	Hex(8)HexNAc(2)Fuc(0)NeuAc(0)	8_2_0_0	High mannose
Q86YD3	N106	Hex(9)HexNAc(2)Fuc(0)NeuAc(0)	9_2_0_0	High mannose
Q8IV08	N284	Hex(8)HexNAc(2)Fuc(0)NeuAc(0)	8_2_0_0	High mannose
Q8IV08	N387	Hex(8)HexNAc(2)Fuc(0)NeuAc(0)	8_2_0_0	High mannose
Q8IV08	N387	Hex(9)HexNAc(2)Fuc(0)NeuAc(0)	9_2_0_0	High mannose
Q8IWA5	N417	Hex(8)HexNAc(2)Fuc(0)NeuAc(0)	8_2_0_0	High mannose
Q8IWB1	N27	Hex(8)HexNAc(2)Fuc(0)NeuAc(0)	8_2_0_0	High mannose
Q8IWF2	N143	Hex(10)HexNAc(2)Fuc(0)NeuAc(0)	10_2_0_0	High mannose
Q8IWF2	N143	Hex(9)HexNAc(2)Fuc(0)NeuAc(0)	9_2_0_0	High mannose
Q8IWF2	N502	Hex(10)HexNAc(2)Fuc(0)NeuAc(0)	10_2_0_0	High mannose
Q8IY17	N11	Hex(6)HexNAc(2)Fuc(0)NeuAc(0)	6_2_0_0	High mannose
Q8IY17	N11	Hex(7)HexNAc(2)Fuc(0)NeuAc(0)	7_2_0_0	High mannose
Q8IY17	N11	Hex(8)HexNAc(2)Fuc(0)NeuAc(0)	8_2_0_0	High mannose
Q8IY17	N11	Hex(6)HexNAc(3)Fuc(0)NeuAc(0)	6_3_0_0	Hybrid
Q8IZA0	N395	Hex(5)HexNAc(4)Fuc(1)NeuAc(0)	5_4_1_0	Complex-Fucosylated
Q8IZA0	N890	Hex(6)HexNAc(2)Fuc(0)NeuAc(0)	6_2_0_0	High mannose
Q8IZA0	N890	Hex(7)HexNAc(2)Fuc(0)NeuAc(0)	7_2_0_0	High mannose
Q8IZA0	N890	Hex(8)HexNAc(2)Fuc(0)NeuAc(0)	8_2_0_0	High mannose
Q8IZY2	N1518	Hex(9)HexNAc(2)Fuc(0)NeuAc(0)	9_2_0_0	High mannose
Q8N441	N293	Hex(8)HexNAc(2)Fuc(0)NeuAc(0)	8_2_0_0	High mannose
Q8N441	N293	Hex(9)HexNAc(2)Fuc(0)NeuAc(0)	9_2_0_0	High mannose
Q8N766	N913	Hex(4)HexNAc(4)Fuc(2)NeuAc(1)	4_4_2_1	Complex-Sialofucosylated
Q8N766	N913	Hex(10)HexNAc(2)Fuc(0)NeuAc(0)	10_2_0_0	High mannose
Q8N766	N913	Hex(11)HexNAc(2)Fuc(0)NeuAc(0)	11_2_0_0	High mannose
Q8N766	N913	Hex(8)HexNAc(2)Fuc(0)NeuAc(0)	8_2_0_0	High mannose
Q8NBJ4	N109	Hex(3)HexNAc(6)Fuc(3)NeuAc(0)	3_6_3_0	Complex-Fucosylated
Q8NBJ4	N109	Hex(4)HexNAc(5)Fuc(3)NeuAc(0)	4_5_3_0	Complex-Fucosylated
Q8NBJ4	N109	Hex(8)HexNAc(2)Fuc(0)NeuAc(0)	8_2_0_0	High mannose
Q8NBJ4	N109	Hex(9)HexNAc(2)Fuc(0)NeuAc(0)	9_2_0_0	High mannose
Q8NBJ4	N144	Hex(4)HexNAc(4)Fuc(2)NeuAc(1)	4_4_2_1	Complex-Sialofucosylated
Q8NBJ4	N144	Hex(5)HexNAc(4)Fuc(2)NeuAc(1)	5_4_2_1	Complex-Sialofucosylated
Q8NBJ4	N144	Hex(5)HexNAc(4)Fuc(3)NeuAc(1)	5_4_3_1	Complex-Sialofucosylated
Q8NBJ4	N144	Hex(9)HexNAc(2)Fuc(0)NeuAc(0)	9_2_0_0	High mannose
Q8NBJ4	N144	Hex(6)HexNAc(3)Fuc(2)NeuAc(0)	6_3_2_0	Hybrid-Fucosylated
Q8NBN3	N62	Hex(6)HexNAc(5)Fuc(2)NeuAc(0)	6_5_2_0	Complex-Fucosylated
Q8NFQ8	N286	Hex(7)HexNAc(2)Fuc(0)NeuAc(0)	7_2_0_0	High mannose
Q8NFQ8	N286	Hex(8)HexNAc(2)Fuc(0)NeuAc(0)	8_2_0_0	High mannose
Q8TCJ2	N616	Hex(9)HexNAc(2)Fuc(0)NeuAc(0)	9_2_0_0	High mannose
Q8TCJ2	N627	Hex(11)HexNAc(2)Fuc(0)NeuAc(0)	11_2_0_0	High mannose
Q8TCJ2	N627	Hex(8)HexNAc(2)Fuc(0)NeuAc(0)	8_2_0_0	High mannose
Q8TCJ2	N627	Hex(9)HexNAc(2)Fuc(0)NeuAc(0)	9_2_0_0	High mannose
Q8TCJ2	N641	Hex(8)HexNAc(2)Fuc(0)NeuAc(0)	8_2_0_0	High mannose
Q8TCJ2	N641	Hex(9)HexNAc(2)Fuc(0)NeuAc(0)	9_2_0_0	High mannose
Q8TCT7	N129	Hex(8)HexNAc(2)Fuc(0)NeuAc(0)	8_2_0_0	High mannose
Q8TCT7	N129	Hex(9)HexNAc(2)Fuc(0)NeuAc(0)	9_2_0_0	High mannose
Q8TEM1	N1441	Hex(6)HexNAc(2)Fuc(0)NeuAc(0)	6_2_0_0	High mannose
Q8TEM1	N1441	Hex(7)HexNAc(2)Fuc(0)NeuAc(0)	7_2_0_0	High mannose
Q8TEM1	N1441	Hex(9)HexNAc(2)Fuc(0)NeuAc(0)	9_2_0_0	High mannose
Q8TEM1	N337	Hex(9)HexNAc(2)Fuc(0)NeuAc(0)	9_2_0_0	High mannose
Q8TEM1	N44	Hex(9)HexNAc(2)Fuc(0)NeuAc(0)	9_2_0_0	High mannose
Q8TEM1	N681	Hex(8)HexNAc(2)Fuc(0)NeuAc(0)	8_2_0_0	High mannose
Q8TEM1	N681	Hex(9)HexNAc(2)Fuc(0)NeuAc(0)	9_2_0_0	High mannose
Q8TEM1	N926	Hex(6)HexNAc(2)Fuc(0)NeuAc(0)	6_2_0_0	High mannose
Q8TEM1	N926	Hex(9)HexNAc(2)Fuc(0)NeuAc(0)	9_2_0_0	High mannose
Q8WVQ1	N88	Hex(7)HexNAc(6)Fuc(0)NeuAc(0)	7_6_0_0	Complex
Q8WVQ1	N88	Hex(5)HexNAc(3)Fuc(2)NeuAc(0)	5_3_2_0	Hybrid-Fucosylated
Q8WVQ1	N88	Hex(6)HexNAc(3)Fuc(1)NeuAc(0)	6_3_1_0	Hybrid-Fucosylated
Q8WVQ1	N88	Hex(6)HexNAc(3)Fuc(2)NeuAc(0)	6_3_2_0	Hybrid-Fucosylated
Q8WVQ1	N88	Hex(6)HexNAc(3)Fuc(0)NeuAc(1)	6_3_0_1	Hybrid-Sialylated
Q92508	N2331	Hex(5)HexNAc(4)Fuc(1)NeuAc(0)	5_4_1_0	Complex-Fucosylated
Q92542	N435	Hex(7)HexNAc(2)Fuc(0)NeuAc(0)	7_2_0_0	High mannose
Q92542	N435	Hex(8)HexNAc(2)Fuc(0)NeuAc(0)	8_2_0_0	High mannose
Q92542	N435	Hex(9)HexNAc(2)Fuc(0)NeuAc(0)	9_2_0_0	High mannose
Q92542	N45	Hex(10)HexNAc(2)Fuc(0)NeuAc(0)	10_2_0_0	High mannose
Q92542	N45	Hex(8)HexNAc(2)Fuc(0)NeuAc(0)	8_2_0_0	High mannose
Q92542	N45	Hex(9)HexNAc(2)Fuc(0)NeuAc(0)	9_2_0_0	High mannose
Q92542	N506	Hex(7)HexNAc(6)Fuc(3)NeuAc(0)	7_6_3_0	Complex-Fucosylated
Q92542	N530	Hex(9)HexNAc(2)Fuc(0)NeuAc(0)	9_2_0_0	High mannose
Q92545	N1059	Hex(9)HexNAc(2)Fuc(0)NeuAc(0)	9_2_0_0	High mannose
Q92545	N947	Hex(9)HexNAc(2)Fuc(0)NeuAc(0)	9_2_0_0	High mannose
Q92673	N1854	Hex(9)HexNAc(2)Fuc(0)NeuAc(0)	9_2_0_0	High mannose
Q92791	N79	Hex(9)HexNAc(2)Fuc(0)NeuAc(0)	9_2_0_0	High mannose
Q92896	N165	Hex(4)HexNAc(5)Fuc(3)NeuAc(0)	4_5_3_0	Complex-Fucosylated
Q92896	N165	Hex(5)HexNAc(4)Fuc(1)NeuAc(0)	5_4_1_0	Complex-Fucosylated
Q92896	N210	Hex(3)HexNAc(6)Fuc(1)NeuAc(0)	3_6_1_0	Complex-Fucosylated
Q92896	N210	Hex(3)HexNAc(6)Fuc(2)NeuAc(0)	3_6_2_0	Complex-Fucosylated
Q92896	N210	Hex(4)HexNAc(5)Fuc(3)NeuAc(0)	4_5_3_0	Complex-Fucosylated
Q92896	N210	Hex(5)HexNAc(4)Fuc(2)NeuAc(0)	5_4_2_0	Complex-Fucosylated
Q92896	N210	Hex(4)HexNAc(5)Fuc(1)NeuAc(1)	4_5_1_1	Complex-Sialofucosylated
Q92896	N210	Hex(10)HexNAc(2)Fuc(0)NeuAc(0)	10_2_0_0	High mannose
Q92896	N210	Hex(8)HexNAc(2)Fuc(0)NeuAc(0)	8_2_0_0	High mannose
Q92896	N210	Hex(9)HexNAc(2)Fuc(0)NeuAc(0)	9_2_0_0	High mannose
Q92896	N786	Hex(4)HexNAc(4)Fuc(2)NeuAc(0)	4_4_2_0	Complex-Fucosylated
Q96AY3	N182	Hex(8)HexNAc(2)Fuc(0)NeuAc(0)	8_2_0_0	High mannose
Q96AY3	N182	Hex(9)HexNAc(2)Fuc(0)NeuAc(0)	9_2_0_0	High mannose
Q96AY3	N294	Hex(9)HexNAc(2)Fuc(0)NeuAc(0)	9_2_0_0	High mannose
Q96AY3	N393	Hex(8)HexNAc(2)Fuc(0)NeuAc(0)	8_2_0_0	High mannose
Q96AY3	N393	Hex(9)HexNAc(2)Fuc(0)NeuAc(0)	9_2_0_0	High mannose
Q96AY3	N407	Hex(9)HexNAc(2)Fuc(0)NeuAc(0)	9_2_0_0	High mannose
Q96AY3	N70	Hex(8)HexNAc(2)Fuc(0)NeuAc(0)	8_2_0_0	High mannose
Q96G97	N88	Hex(4)HexNAc(4)Fuc(1)NeuAc(1)	4_4_1_1	Complex-Sialofucosylated
Q96G97	N88	Hex(8)HexNAc(2)Fuc(0)NeuAc(0)	8_2_0_0	High mannose
Q96GX1	N391	Hex(9)HexNAc(2)Fuc(0)NeuAc(0)	9_2_0_0	High mannose
Q96HD1	N205	Hex(7)HexNAc(2)Fuc(0)NeuAc(0)	7_2_0_0	High mannose
Q96HE7	N280	Hex(9)HexNAc(2)Fuc(0)NeuAc(0)	9_2_0_0	High mannose
Q96J42	N165	Hex(6)HexNAc(2)Fuc(0)NeuAc(0)	6_2_0_0	High mannose
Q96J42	N165	Hex(8)HexNAc(2)Fuc(0)NeuAc(0)	8_2_0_0	High mannose
Q96J42	N293	Hex(8)HexNAc(2)Fuc(0)NeuAc(0)	8_2_0_0	High mannose
Q96J42	N293	Hex(9)HexNAc(2)Fuc(0)NeuAc(0)	9_2_0_0	High mannose
Q96JJ7	N258	Hex(6)HexNAc(2)Fuc(0)NeuAc(0)	6_2_0_0	High mannose
Q96JJ7	N258	Hex(7)HexNAc(2)Fuc(0)NeuAc(0)	7_2_0_0	High mannose
Q96JJ7	N258	Hex(9)HexNAc(2)Fuc(0)NeuAc(0)	9_2_0_0	High mannose
Q96KA5	N229	Hex(8)HexNAc(2)Fuc(0)NeuAc(0)	8_2_0_0	High mannose
Q96KA5	N91	Hex(6)HexNAc(2)Fuc(0)NeuAc(0)	6_2_0_0	High mannose
Q96KA5	N91	Hex(8)HexNAc(2)Fuc(0)NeuAc(0)	8_2_0_0	High mannose
Q96PB1	N241	Hex(6)HexNAc(3)Fuc(2)NeuAc(0)	6_3_2_0	Hybrid-Fucosylated
Q99523	N406	Hex(10)HexNAc(2)Fuc(0)NeuAc(0)	10_2_0_0	High mannose
Q99523	N406	Hex(9)HexNAc(2)Fuc(0)NeuAc(0)	9_2_0_0	High mannose
Q99571	N199	Hex(9)HexNAc(2)Fuc(0)NeuAc(0)	9_2_0_0	High mannose
Q99571	N208	Hex(8)HexNAc(2)Fuc(0)NeuAc(0)	8_2_0_0	High mannose
Q99571	N208	Hex(9)HexNAc(2)Fuc(0)NeuAc(0)	9_2_0_0	High mannose
Q99941	N676	Hex(8)HexNAc(2)Fuc(0)NeuAc(0)	8_2_0_0	High mannose
Q99985	N586	Hex(8)HexNAc(2)Fuc(0)NeuAc(0)	8_2_0_0	High mannose
Q99988	N70	Hex(4)HexNAc(6)Fuc(0)NeuAc(0)	4_6_0_0	Complex
Q99988	N70	Hex(3)HexNAc(6)Fuc(1)NeuAc(0)	3_6_1_0	Complex-Fucosylated
Q99988	N70	Hex(3)HexNAc(6)Fuc(2)NeuAc(0)	3_6_2_0	Complex-Fucosylated
Q99988	N70	Hex(8)HexNAc(2)Fuc(0)NeuAc(0)	8_2_0_0	High mannose
Q99988	N70	Hex(9)HexNAc(2)Fuc(0)NeuAc(0)	9_2_0_0	High mannose
Q9BRN9	N169	Hex(8)HexNAc(2)Fuc(0)NeuAc(0)	8_2_0_0	High mannose
Q9BRN9	N169	Hex(9)HexNAc(2)Fuc(0)NeuAc(0)	9_2_0_0	High mannose
Q9BRN9	N87	Hex(4)HexNAc(6)Fuc(0)NeuAc(0)	4_6_0_0	Complex
Q9BU23	N616	Hex(7)HexNAc(2)Fuc(0)NeuAc(0)	7_2_0_0	High mannose
Q9BU23	N616	Hex(9)HexNAc(2)Fuc(0)NeuAc(0)	9_2_0_0	High mannose
Q9BVK6	N125	Hex(3)HexNAc(4)Fuc(1)NeuAc(0)	3_4_1_0	Complex-Fucosylated
Q9BVK6	N125	Hex(6)HexNAc(2)Fuc(0)NeuAc(0)	6_2_0_0	High mannose
Q9BVK6	N125	Hex(7)HexNAc(2)Fuc(0)NeuAc(0)	7_2_0_0	High mannose
Q9BVK6	N125	Hex(8)HexNAc(2)Fuc(0)NeuAc(0)	8_2_0_0	High mannose
Q9BVK6	N125	Hex(9)HexNAc(2)Fuc(0)NeuAc(0)	9_2_0_0	High mannose
Q9BX74	N96	Hex(8)HexNAc(2)Fuc(0)NeuAc(0)	8_2_0_0	High mannose
Q9BY67	N113	Hex(7)HexNAc(6)Fuc(1)NeuAc(0)	7_6_1_0	Complex-Fucosylated
Q9BZC7	N1775	Hex(9)HexNAc(2)Fuc(0)NeuAc(0)	9_2_0_0	High mannose
Q9BZC7	N305	Hex(8)HexNAc(2)Fuc(0)NeuAc(0)	8_2_0_0	High mannose
Q9BZC7	N628	Hex(9)HexNAc(2)Fuc(0)NeuAc(0)	9_2_0_0	High mannose
Q9BZQ6	N195	Hex(8)HexNAc(2)Fuc(0)NeuAc(0)	8_2_0_0	High mannose
Q9GZU1	N159	Hex(8)HexNAc(2)Fuc(0)NeuAc(0)	8_2_0_0	High mannose
Q9H0X4	N389	Hex(6)HexNAc(5)Fuc(1)NeuAc(0)	6_5_1_0	Complex-Fucosylated
Q9H0X4	N389	Hex(6)HexNAc(5)Fuc(2)NeuAc(0)	6_5_2_0	Complex-Fucosylated
Q9H0X4	N389	Hex(10)HexNAc(2)Fuc(0)NeuAc(0)	10_2_0_0	High mannose
Q9H0X4	N389	Hex(8)HexNAc(2)Fuc(0)NeuAc(0)	8_2_0_0	High mannose
Q9H0X4	N389	Hex(9)HexNAc(2)Fuc(0)NeuAc(0)	9_2_0_0	High mannose
Q9H330	N551	Hex(8)HexNAc(2)Fuc(0)NeuAc(0)	8_2_0_0	High mannose
Q9H330	N551	Hex(9)HexNAc(2)Fuc(0)NeuAc(0)	9_2_0_0	High mannose
Q9H5K3	N67	Hex(8)HexNAc(2)Fuc(0)NeuAc(0)	8_2_0_0	High mannose
Q9H5V8	N122	Hex(8)HexNAc(2)Fuc(0)NeuAc(0)	8_2_0_0	High mannose
Q9H5V8	N339	Hex(5)HexNAc(4)Fuc(1)NeuAc(0)	5_4_1_0	Complex-Fucosylated
Q9H5V8	N339	Hex(5)HexNAc(4)Fuc(2)NeuAc(0)	5_4_2_0	Complex-Fucosylated
Q9H5V8	N339	Hex(9)HexNAc(2)Fuc(0)NeuAc(0)	9_2_0_0	High mannose
Q9H5V8	N386	Hex(5)HexNAc(4)Fuc(2)NeuAc(0)	5_4_2_0	Complex-Fucosylated
Q9H5V8	N477	Hex(5)HexNAc(4)Fuc(1)NeuAc(0)	5_4_1_0	Complex-Fucosylated
Q9H5V8	N477	Hex(5)HexNAc(4)Fuc(2)NeuAc(0)	5_4_2_0	Complex-Fucosylated
Q9H5V8	N512	Hex(7)HexNAc(2)Fuc(0)NeuAc(0)	7_2_0_0	High mannose
Q9H5V8	N512	Hex(8)HexNAc(2)Fuc(0)NeuAc(0)	8_2_0_0	High mannose
Q9H5V8	N577	Hex(9)HexNAc(2)Fuc(0)NeuAc(0)	9_2_0_0	High mannose
Q9H6L2	N221	Hex(10)HexNAc(2)Fuc(0)NeuAc(0)	10_2_0_0	High mannose
Q9H6L2	N221	Hex(9)HexNAc(2)Fuc(0)NeuAc(0)	9_2_0_0	High mannose
Q9HD45	N174	Hex(6)HexNAc(5)Fuc(4)NeuAc(0)	6_5_4_0	Complex-Fucosylated
Q9HD45	N174	Hex(7)HexNAc(6)Fuc(5)NeuAc(0)	7_6_5_0	Complex-Fucosylated
Q9HD45	N174	Hex(9)HexNAc(2)Fuc(0)NeuAc(0)	9_2_0_0	High mannose
Q9HD45	N174	Hex(5)HexNAc(3)Fuc(2)NeuAc(0)	5_3_2_0	Hybrid-Fucosylated
Q9HD45	N174	Hex(6)HexNAc(3)Fuc(2)NeuAc(0)	6_3_2_0	Hybrid-Fucosylated
Q9HDC9	N160	Hex(10)HexNAc(2)Fuc(0)NeuAc(0)	10_2_0_0	High mannose
Q9HDC9	N160	Hex(5)HexNAc(2)Fuc(0)NeuAc(0)	5_2_0_0	High mannose
Q9HDC9	N160	Hex(6)HexNAc(2)Fuc(0)NeuAc(0)	6_2_0_0	High mannose
Q9HDC9	N160	Hex(8)HexNAc(2)Fuc(0)NeuAc(0)	8_2_0_0	High mannose
Q9HDC9	N160	Hex(9)HexNAc(2)Fuc(0)NeuAc(0)	9_2_0_0	High mannose
Q9HDC9	N196	Hex(7)HexNAc(2)Fuc(0)NeuAc(0)	7_2_0_0	High mannose
Q9HDC9	N196	Hex(8)HexNAc(2)Fuc(0)NeuAc(0)	8_2_0_0	High mannose
Q9NU53	N46	Hex(8)HexNAc(2)Fuc(0)NeuAc(0)	8_2_0_0	High mannose
Q9NU53	N46	Hex(9)HexNAc(2)Fuc(0)NeuAc(0)	9_2_0_0	High mannose
Q9NX62	N259	Hex(5)HexNAc(7)Fuc(0)NeuAc(0)	5_7_0_0	Complex
Q9NX62	N259	Hex(6)HexNAc(7)Fuc(0)NeuAc(0)	6_7_0_0	Complex
Q9NX62	N259	Hex(7)HexNAc(6)Fuc(0)NeuAc(0)	7_6_0_0	Complex
Q9NX62	N259	Hex(3)HexNAc(4)Fuc(3)NeuAc(0)	3_4_3_0	Complex-Fucosylated
Q9NX62	N259	Hex(3)HexNAc(6)Fuc(3)NeuAc(0)	3_6_3_0	Complex-Fucosylated
Q9NX62	N259	Hex(4)HexNAc(5)Fuc(3)NeuAc(0)	4_5_3_0	Complex-Fucosylated
Q9NX62	N259	Hex(4)HexNAc(5)Fuc(4)NeuAc(0)	4_5_4_0	Complex-Fucosylated
Q9NX62	N259	Hex(5)HexNAc(5)Fuc(2)NeuAc(0)	5_5_2_0	Complex-Fucosylated
Q9NX62	N259	Hex(5)HexNAc(5)Fuc(3)NeuAc(0)	5_5_3_0	Complex-Fucosylated
Q9NX62	N259	Hex(4)HexNAc(4)Fuc(3)NeuAc(1)	4_4_3_1	Complex-Sialofucosylated
Q9NX62	N259	Hex(4)HexNAc(5)Fuc(1)NeuAc(1)	4_5_1_1	Complex-Sialofucosylated
Q9NX62	N259	Hex(4)HexNAc(5)Fuc(2)NeuAc(1)	4_5_2_1	Complex-Sialofucosylated
Q9NX62	N259	Hex(4)HexNAc(5)Fuc(3)NeuAc(1)	4_5_3_1	Complex-Sialofucosylated
Q9NX62	N259	Hex(5)HexNAc(4)Fuc(2)NeuAc(1)	5_4_2_1	Complex-Sialofucosylated
Q9NX62	N259	Hex(8)HexNAc(2)Fuc(0)NeuAc(0)	8_2_0_0	High mannose
Q9NXG6	N348	Hex(4)HexNAc(4)Fuc(2)NeuAc(1)	4_4_2_1	Complex-Sialofucosylated
Q9NXG6	N348	Hex(10)HexNAc(2)Fuc(0)NeuAc(0)	10_2_0_0	High mannose
Q9NXG6	N348	Hex(8)HexNAc(2)Fuc(0)NeuAc(0)	8_2_0_0	High mannose
Q9NY35	N72	Hex(8)HexNAc(2)Fuc(0)NeuAc(0)	8_2_0_0	High mannose
Q9NY35	N72	Hex(9)HexNAc(2)Fuc(0)NeuAc(0)	9_2_0_0	High mannose
Q9NZ53	N480	Hex(5)HexNAc(4)Fuc(1)NeuAc(0)	5_4_1_0	Complex-Fucosylated
Q9NZ53	N480	Hex(5)HexNAc(4)Fuc(2)NeuAc(0)	5_4_2_0	Complex-Fucosylated
Q9NZ53	N480	Hex(5)HexNAc(4)Fuc(0)NeuAc(1)	5_4_0_1	Complex/Hybrid-Sialylated
Q9P0T7	N47	Hex(10)HexNAc(2)Fuc(0)NeuAc(0)	10_2_0_0	High mannose
Q9P0T7	N47	Hex(6)HexNAc(2)Fuc(0)NeuAc(0)	6_2_0_0	High mannose
Q9P0T7	N47	Hex(8)HexNAc(2)Fuc(0)NeuAc(0)	8_2_0_0	High mannose
Q9P0T7	N47	Hex(9)HexNAc(2)Fuc(0)NeuAc(0)	9_2_0_0	High mannose
Q9P2B2	N286	Hex(7)HexNAc(6)Fuc(1)NeuAc(0)	7_6_1_0	Complex-Fucosylated
Q9P2B2	N286	Hex(9)HexNAc(2)Fuc(0)NeuAc(0)	9_2_0_0	High mannose
Q9P2B2	N618	Hex(7)HexNAc(6)Fuc(1)NeuAc(0)	7_6_1_0	Complex-Fucosylated
Q9P2K2	N460	Hex(9)HexNAc(2)Fuc(0)NeuAc(0)	9_2_0_0	High mannose
Q9UBS9	N524	Hex(8)HexNAc(2)Fuc(0)NeuAc(0)	8_2_0_0	High mannose
Q9UBS9	N530	Hex(8)HexNAc(2)Fuc(0)NeuAc(0)	8_2_0_0	High mannose
Q9UBS9	N530	Hex(6)HexNAc(3)Fuc(0)NeuAc(0)	6_3_0_0	Hybrid
Q9UBV2	N272	Hex(8)HexNAc(2)Fuc(0)NeuAc(0)	8_2_0_0	High mannose
Q9UBV2	N272	Hex(9)HexNAc(2)Fuc(0)NeuAc(0)	9_2_0_0	High mannose
Q9UBV2	N431	Hex(8)HexNAc(2)Fuc(0)NeuAc(0)	8_2_0_0	High mannose
Q9UBV2	N431	Hex(9)HexNAc(2)Fuc(0)NeuAc(0)	9_2_0_0	High mannose
Q9UBV2	N608	Hex(7)HexNAc(2)Fuc(0)NeuAc(0)	7_2_0_0	High mannose
Q9UBV2	N608	Hex(8)HexNAc(2)Fuc(0)NeuAc(0)	8_2_0_0	High mannose
Q9UBV2	N608	Hex(9)HexNAc(2)Fuc(0)NeuAc(0)	9_2_0_0	High mannose
Q9UH99	N636	Hex(6)HexNAc(2)Fuc(0)NeuAc(0)	6_2_0_0	High mannose
Q9UH99	N636	Hex(7)HexNAc(2)Fuc(0)NeuAc(0)	7_2_0_0	High mannose
Q9UH99	N636	Hex(8)HexNAc(2)Fuc(0)NeuAc(0)	8_2_0_0	High mannose
Q9UHG3	N353	Hex(8)HexNAc(2)Fuc(0)NeuAc(0)	8_2_0_0	High mannose
Q9UHG3	N353	Hex(9)HexNAc(2)Fuc(0)NeuAc(0)	9_2_0_0	High mannose
Q9UHN6	N1234	Hex(9)HexNAc(2)Fuc(0)NeuAc(0)	9_2_0_0	High mannose
Q9UHN6	N248	Hex(4)HexNAc(4)Fuc(2)NeuAc(1)	4_4_2_1	Complex-Sialofucosylated
Q9UHN6	N248	Hex(9)HexNAc(2)Fuc(0)NeuAc(0)	9_2_0_0	High mannose
Q9UHN6	N362	Hex(7)HexNAc(2)Fuc(0)NeuAc(0)	7_2_0_0	High mannose
Q9UHN6	N362	Hex(9)HexNAc(2)Fuc(0)NeuAc(0)	9_2_0_0	High mannose
Q9UHN6	N914	Hex(10)HexNAc(2)Fuc(0)NeuAc(0)	10_2_0_0	High mannose
Q9UIQ6	N145	Hex(7)HexNAc(2)Fuc(0)NeuAc(0)	7_2_0_0	High mannose
Q9UIQ6	N145	Hex(8)HexNAc(2)Fuc(0)NeuAc(0)	8_2_0_0	High mannose
Q9UIQ6	N145	Hex(9)HexNAc(2)Fuc(0)NeuAc(0)	9_2_0_0	High mannose
Q9UIQ6	N448	Hex(7)HexNAc(6)Fuc(1)NeuAc(0)	7_6_1_0	Complex-Fucosylated
Q9UKY4	N330	Hex(8)HexNAc(2)Fuc(0)NeuAc(0)	8_2_0_0	High mannose
Q9ULL4	N900	Hex(9)HexNAc(2)Fuc(0)NeuAc(0)	9_2_0_0	High mannose
Q9Y4L1	N515	Hex(9)HexNAc(2)Fuc(0)NeuAc(0)	9_2_0_0	High mannose
Q9Y4L1	N596	Hex(6)HexNAc(2)Fuc(0)NeuAc(0)	6_2_0_0	High mannose
Q9Y4L1	N862	Hex(9)HexNAc(2)Fuc(0)NeuAc(0)	9_2_0_0	High mannose
Q9Y4L1	N869	Hex(6)HexNAc(2)Fuc(0)NeuAc(0)	6_2_0_0	High mannose
Q9Y4L1	N869	Hex(8)HexNAc(2)Fuc(0)NeuAc(0)	8_2_0_0	High mannose
Q9Y4L1	N869	Hex(9)HexNAc(2)Fuc(0)NeuAc(0)	9_2_0_0	High mannose
Q9Y4L1	N931	Hex(6)HexNAc(2)Fuc(0)NeuAc(0)	6_2_0_0	High mannose
Q9Y4L1	N931	Hex(7)HexNAc(2)Fuc(0)NeuAc(0)	7_2_0_0	High mannose
Q9Y4L1	N931	Hex(8)HexNAc(2)Fuc(0)NeuAc(0)	8_2_0_0	High mannose
Q9Y4L1	N931	Hex(9)HexNAc(2)Fuc(0)NeuAc(0)	9_2_0_0	High mannose
Q9Y5E4	N169	Hex(9)HexNAc(2)Fuc(0)NeuAc(0)	9_2_0_0	High mannose
Q9Y5E4	N566	Hex(10)HexNAc(2)Fuc(0)NeuAc(0)	10_2_0_0	High mannose
Q9Y5F0	N567	Hex(10)HexNAc(2)Fuc(0)NeuAc(0)	10_2_0_0	High mannose
Q9Y5Y6	N109	Hex(5)HexNAc(4)Fuc(2)NeuAc(0)	5_4_2_0	Complex-Fucosylated
Q9Y5Y6	N109	Hex(5)HexNAc(4)Fuc(0)NeuAc(1)	5_4_0_1	Complex/Hybrid-Sialylated
Q9Y5Y6	N772	Hex(10)HexNAc(2)Fuc(0)NeuAc(0)	10_2_0_0	High mannose
Q9Y5Y6	N772	Hex(5)HexNAc(2)Fuc(0)NeuAc(0)	5_2_0_0	High mannose
Q9Y5Y6	N772	Hex(6)HexNAc(2)Fuc(0)NeuAc(0)	6_2_0_0	High mannose
Q9Y5Y6	N772	Hex(7)HexNAc(2)Fuc(0)NeuAc(0)	7_2_0_0	High mannose
Q9Y5Y6	N772	Hex(9)HexNAc(2)Fuc(0)NeuAc(0)	9_2_0_0	High mannose
Q9Y5Y6	N772	Hex(6)HexNAc(3)Fuc(0)NeuAc(0)	6_3_0_0	Hybrid
Q9Y5Y6	N772	Hex(6)HexNAc(3)Fuc(1)NeuAc(0)	6_3_1_0	Hybrid-Fucosylated
Q9Y624	N185	Hex(5)HexNAc(4)Fuc(1)NeuAc(0)	5_4_1_0	Complex-Fucosylated
Q9Y624	N185	Hex(5)HexNAc(4)Fuc(2)NeuAc(0)	5_4_2_0	Complex-Fucosylated
Q9Y624	N185	Hex(5)HexNAc(4)Fuc(3)NeuAc(0)	5_4_3_0	Complex-Fucosylated
Q9Y624	N185	Hex(5)HexNAc(4)Fuc(2)NeuAc(1)	5_4_2_1	Complex-Sialofucosylated
Q9Y624	N185	Hex(5)HexNAc(3)Fuc(1)NeuAc(0)	5_3_1_0	Hybrid-Fucosylated
Q9Y624	N185	Hex(5)HexNAc(3)Fuc(2)NeuAc(0)	5_3_2_0	Hybrid-Fucosylated
Q9Y624	N185	Hex(6)HexNAc(3)Fuc(1)NeuAc(0)	6_3_1_0	Hybrid-Fucosylated
Q9Y624	N185	Hex(6)HexNAc(3)Fuc(2)NeuAc(0)	6_3_2_0	Hybrid-Fucosylated
Q9Y624	N185	Hex(7)HexNAc(5)Fuc(3)NeuAc(0)	7_5_3_0	Hybrid-Fucosylated
Q9Y624	N185	Hex(5)HexNAc(3)Fuc(1)NeuAc(1)	5_3_1_1	Hybrid-Sialofucosylated
Q9Y624	N185	Hex(5)HexNAc(3)Fuc(0)NeuAc(1)	5_3_0_1	Hybrid-Sialylated
Q9Y639	N171	Hex(6)HexNAc(5)Fuc(2)NeuAc(0)	6_5_2_0	Complex-Fucosylated
Q9Y639	N197	Hex(5)HexNAc(4)Fuc(2)NeuAc(0)	5_4_2_0	Complex-Fucosylated
Q9Y639	N229	Hex(8)HexNAc(2)Fuc(0)NeuAc(0)	8_2_0_0	High mannose
Q9Y639	N229	Hex(9)HexNAc(2)Fuc(0)NeuAc(0)	9_2_0_0	High mannose
Q9Y666	N312	Hex(8)HexNAc(2)Fuc(0)NeuAc(0)	8_2_0_0	High mannose
Q9Y6M7	N796	Hex(7)HexNAc(2)Fuc(0)NeuAc(0)	7_2_0_0	High mannose
